# Supplementary material
Source: HighWire-hosted journal article supplement (https://gh.bmj.com/content/6/3/e004248)
Supplement: inline-supplementary-material-5 [file inline-supplementary-material-5.pdf]

**Table 4: Main results: Link between SIA exposure and maternal health service uptake**

| <i>Dependent variables: various indicators of maternal healthcare access (see right)</i> | Delivery                 |                               |                          | Antenatal care               |                           |
|------------------------------------------------------------------------------------------|--------------------------|-------------------------------|--------------------------|------------------------------|---------------------------|
|                                                                                          | At home                  | At private facility           | At public facility       | No. of antenatal care visits | No. of tetanus injections |
| EXP_PREG                                                                                 | 0.007<br>[-0.013, 0.027] | -0.065***<br>[-0.093, -0.036] | 0.010<br>[-0.009, 0.029] | -0.025*<br>[-0.054, 0.003]   | 0.001<br>[-0.008, 0.009]  |
| Level 1 Observations (child)                                                             | 34713                    | 34713                         | 34713                    | 35019                        | 36585                     |
| Level 2 Observations (LGA)                                                               | 686                      | 686                           | 686                      | 686                          | 687                       |
| Akaike Information Criterion                                                             | 26422.845                | 17601.384                     | 30318.818                | 193640.288                   | 111227.001                |
| Prob. > $\chi^2$                                                                         | <0.001                   | <0.001                        | <0.001                   | <0.001                       | <0.001                    |

95% confidence intervals in brackets

\* p &lt; 0.10, \*\* p &lt; 0.05, \*\*\* p &lt; 0.01

Table 4a: Detailed results: Link between SIA exposure and maternal health service uptake

| Dependent variables: various indicators of maternal healthcare access (see right) | Main results |                     |                    |                              |                           | Year-Interaction models |                     |                    |                              |                           | Robustness checks: reporting (date approximation) |                     |                    |                              |                           |
|-----------------------------------------------------------------------------------|--------------|---------------------|--------------------|------------------------------|---------------------------|-------------------------|---------------------|--------------------|------------------------------|---------------------------|---------------------------------------------------|---------------------|--------------------|------------------------------|---------------------------|
|                                                                                   | Delivery     |                     |                    | Antenatal care               |                           | Delivery                |                     |                    | Antenatal care               |                           | Delivery                                          |                     |                    | Antenatal care               |                           |
|                                                                                   | At home      | At private facility | At public facility | No. of antenatal care visits | No. of tetanus injections | At home                 | At private facility | At public facility | No. of antenatal care visits | No. of tetanus injections | At home                                           | At private facility | At public facility | No. of antenatal care visits | No. of tetanus injections |
| EXP_PREG                                                                          | 0.007        | -0.065***           | 0.010              | -0.025*                      | 0.001                     | 0.102                   | -0.094              | 0.005              | 0.027                        | -0.040                    | -0.004                                            | -0.060***           | 0.016**            | -0.013                       | 0.001                     |
| EXPxYR [yr = 2008]                                                                |              |                     |                    |                              |                           |                         |                     |                    |                              |                           |                                                   |                     |                    |                              |                           |
| EXPxYR [yr = 2013]                                                                |              |                     |                    |                              |                           |                         |                     |                    |                              |                           |                                                   |                     |                    |                              |                           |
| EXPxYR [yr = 2018]                                                                |              |                     |                    |                              |                           |                         |                     |                    |                              |                           |                                                   |                     |                    |                              |                           |
| MOT_ANC                                                                           | -0.137***    | 0.057***            | 0.062***           |                              |                           | -0.137***               | 0.057***            | 0.062***           |                              |                           |                                                   |                     |                    |                              |                           |
| MOT_EDM                                                                           | -0.065***    | 0.052***            | 0.057***           | 0.097***                     | 0.031***                  | -0.065***               | 0.052***            | 0.057***           | 0.097***                     | 0.031***                  |                                                   |                     |                    |                              |                           |
| MOT_EDF                                                                           | -0.030***    | 0.033***            | 0.035***           | 0.082***                     | 0.023***                  | -0.030***               | 0.033***            | 0.035***           | 0.082***                     | 0.023***                  |                                                   |                     |                    |                              |                           |
| MOT_AWE                                                                           | -0.913***    | 0.284***            | 0.978***           | 1.946***                     | 0.643***                  | -0.911***               | 0.282***            | 0.977***           | 1.928***                     | 0.637***                  |                                                   |                     |                    |                              |                           |
| MOT_AGE                                                                           | -0.002       | 0.001               | 0.002              | 0.011***                     | 0.000                     | -0.003                  | 0.001               | 0.002              | 0.011***                     | 0.001                     |                                                   |                     |                    |                              |                           |
| HH_RUR                                                                            | 0.538***     | -0.374***           | -0.325***          | -0.588***                    | -0.156***                 | 0.542***                | -0.376***           | -0.329***          | -0.585***                    | -0.159***                 |                                                   |                     |                    |                              |                           |
| HH_REL (ref: Catholic): Other Christian                                           | 0.094        | -0.097              | 0.012              | -0.055                       | -0.046*                   | 0.092                   | -0.097              | 0.013              | -0.060                       | -0.047*                   |                                                   |                     |                    |                              |                           |
| HH_REL (ref: Catholic): Islam                                                     | 0.225***     | -0.242***           | -0.025             | -0.168                       | -0.101***                 | 0.225***                | -0.242***           | -0.026             | -0.170                       | -0.100***                 |                                                   |                     |                    |                              |                           |
| HH_REL (ref: Catholic): Traditionalist                                            | 1.004***     | -0.911***           | -0.475***          | -0.653***                    | -0.350***                 | 1.004***                | -0.913***           | -0.474***          | -0.665***                    | -0.354***                 |                                                   |                     |                    |                              |                           |
| HH_REL (ref: Catholic): Other                                                     | -0.257       | 0.019               | 0.387              | -0.084                       | -0.142                    | -0.265                  | 0.028               | 0.388              | 0.020                        | -0.115                    |                                                   |                     |                    |                              |                           |
| HH_ETH (ref: Ekoi): Fulani                                                        | 0.672***     | -0.084              | -0.765***          | -0.741                       | -0.349***                 | 0.639***                | -0.080              | -0.731***          | -0.813                       | -0.324***                 |                                                   |                     |                    |                              |                           |
| HH_ETH (ref: Ekoi): Hausa                                                         | 0.941***     | -0.596              | -0.820***          | -0.436                       | -0.254***                 | 0.908***                | -0.591              | -0.787***          | -0.506                       | -0.228**                  |                                                   |                     |                    |                              |                           |
| HH_ETH (ref: Ekoi): Ibibio                                                        | 0.378        | 0.562               | -0.310             | -0.197                       | -0.102                    | 0.350                   | 0.565               | -0.281             | -0.254                       | -0.081                    |                                                   |                     |                    |                              |                           |
| HH_ETH (ref: Ekoi): Igala                                                         | -0.510*      | 1.297***            | 0.034              | 0.013                        | 0.277*                    | -0.545***               | 1.301***            | 0.069              | -0.066                       | 0.301**                   |                                                   |                     |                    |                              |                           |
| HH_ETH (ref: Ekoi): Igbo                                                          | -0.788***    | 1.877***            | -0.575***          | 1.258*                       | 0.120                     | -0.813***               | 1.881***            | -0.547***          | 1.201*                       | 0.141                     |                                                   |                     |                    |                              |                           |
| HH_ETH (ref: Ekoi): Ijaw / Izon                                                   | 0.887***     | 0.122               | -0.812***          | -0.683                       | -0.133                    | 0.863***                | 0.122               | -0.786***          | -0.749                       | -0.120                    |                                                   |                     |                    |                              |                           |
| HH_ETH (ref: Ekoi): Kanuri / Beriberi                                             | 0.996***     | -0.539              | -0.949***          | -0.503                       | -0.239                    | 0.961***                | -0.533              | -0.912***          | -0.591                       | -0.211                    |                                                   |                     |                    |                              |                           |
| HH_ETH (ref: Ekoi): Tiv                                                           | -0.776***    | 1.720***            | 0.133              | -0.896                       | -0.344**                  | -0.809***               | 1.722***            | 0.164              | -0.968                       | -0.321**                  |                                                   |                     |                    |                              |                           |
| HH_ETH (ref: Ekoi): Yoruba                                                        | -0.160       | 1.295***            | -0.418**           | 2.233***                     | 0.060                     | -0.189                  | 1.300***            | -0.388**           | 2.177***                     | 0.078                     |                                                   |                     |                    |                              |                           |
| HH_ETH (ref: Ekoi): Other                                                         | 0.206        | 0.905**             | -0.350*            | 0.035                        | -0.018                    | 0.174                   | 0.909**             | -0.318             | -0.035                       | 0.005                     |                                                   |                     |                    |                              |                           |
| HH_SIZ                                                                            | 0.032***     | -0.017**            | -0.020***          | -0.043***                    | -0.006***                 | 0.033***                | -0.017**            | -0.020***          | -0.043***                    | -0.006***                 |                                                   |                     |                    |                              |                           |
| HH_WEA                                                                            | -0.207***    | 0.120***            | 0.130***           | 0.286***                     | 0.058***                  | -0.207***               | 0.120***            | 0.129***           | 0.288***                     | 0.059***                  |                                                   |                     |                    |                              |                           |
| YEAR (ref: 2003): 2008                                                            | 0.013        | -0.240*             | 0.079              | -0.634***                    | -0.100*                   | 0.146                   | -0.266              | 0.162              | -0.459                       | -0.094                    |                                                   |                     |                    |                              |                           |
| YEAR (ref: 2003): 2013                                                            | -0.025       | -0.388***           | 0.143*             | -0.258                       | -0.024                    | 0.263                   | -0.449              | 0.064              | 0.186                        | -0.112                    |                                                   |                     |                    |                              |                           |
| YEAR (ref: 2003): 2018                                                            | -0.247***    | -0.401***           | 0.354***           | -1.242***                    | -0.046                    | -0.011                  | -0.498              | 0.350              | -1.370***                    | -0.217**                  |                                                   |                     |                    |                              |                           |
| Constant                                                                          | 2.049***     | -3.635***           | -2.439***          | 3.562***                     | 0.987***                  | 1.851***                | -3.572***           | -2.455***          | 3.498***                     | 1.065***                  |                                                   |                     |                    |                              |                           |
| Multilevel variance parameter: Level 1                                            | 0.449***     | 0.726***            | 0.462***           | 0.683***                     | -1.428***                 | 0.445***                | 0.723***            | 0.460***           | 0.672***                     | -1.456***                 |                                                   |                     |                    |                              |                           |
| Multilevel variance parameter: Residual                                           |              |                     |                    | 1.322***                     | 0.090***                  |                         |                     |                    | 1.321***                     | 0.090***                  |                                                   |                     |                    |                              |                           |
| Level 1 Observations (child)                                                      | 34713        | 34713               | 34713              | 35019                        | 36585                     | 34713                   | 34713               | 34713              | 35019                        | 36585                     | 45437                                             | 45437               | 45437              | 45839                        | 47644                     |
| Level 2 Observations (LGA)                                                        | 686          | 686                 | 686                | 686                          | 687                       | 686                     | 686                 | 686                | 686                          | 687                       | 689                                               | 689                 | 689                | 689                          | 690                       |
| Akaike Information Criterion                                                      | 26422.845    | 17601.384           | 30318.818          | 193640.288                   | 111227.001                | 26423.667               | 17606.418           | 30319.207          | 193610.157                   | 111190.932                | 34655.448                                         | 21928.17            | 39661.692          | 249499.916                   | 144291.105                |
| Prob. > X <sup>2</sup>                                                            | <0.001       | <0.001              | <0.001             | <0.001                       | <0.001                    | <0.001                  | <0.001              | <0.001             | <0.001                       | <0.001                    | <0.001                                            | <0.001              | <0.001             | <0.001                       | <0.001                    |

95% confidence intervals in brackets

\* p &lt; 0.10, \*\* p &lt; 0.05, \*\*\* p &lt; 0.01
