# Supplementary material
Source: HighWire-hosted journal article supplement (https://gh.bmj.com/content/6/3/e004248)
Supplement: inline-supplementary-material-10 [file inline-supplementary-material-10.pdf]

**Contents**

Figure 1: Overview of SIA coverage of Nigerian LGAs, 2000-2017

Table 1: Variable Summary

Table 2: Model overview

Table 3: Main results: Link between SIA exposure and routine childhood immunisation uptake

Table 4: Main results: Link between SIA exposure and maternal health service uptake

Table 5: Main results: Link between SIA exposure and child survival

Table 6: Relationship between health system performance and SIA frequency across regions in survey sample.

Table 7: Detailed results: Link between SIA exposure and child/maternal health outcomes, stratified by region.

Table 8: Intraclass correlation on LGA level in aggregate two-level models.

Table 3a: Detailed results: Link between SIA exposure and routine childhood immunisation uptake

Table 3b: Robustness check (3-level models): Link between SIA exposure and routine childhood immunisation uptake

Table 4a: Detailed results: Link between SIA exposure and maternal health service uptake

Table 4b: Robustness check (3-level models): Link between SIA exposure and maternal health service uptake

Table 5a: Detailed results: Link between SIA exposure and child survival

Table 5b: Robustness check (3-level models): Link between SIA exposure and child survival

Table 6a: Additional robustness checks: exclusion of 2018 survey round to compensate for mop-up variability

Table 6b: Additional robustness checks: year-wise stratification to detect time trends

Table 6c: Additional robustness checks: exclusion of measles vaccine from full immunisation outcome

Table 6d: Additional robustness checks: decomposition of SIA exposure into different campaign types

Table 6e: Additional robustness checks: fixed effects models

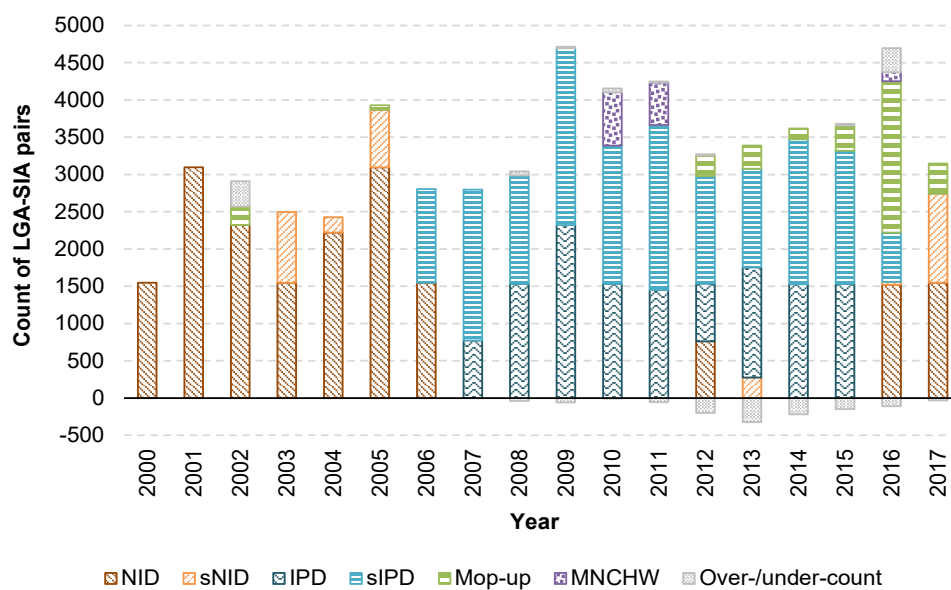

**Figure 1. Overview of SIA coverage of Nigerian LGAs, 2000-2017**

Source: Authors.

Notes:  $n = 59,127$  LGA-SIA pairs (a total of 145 SIAs and 744 LGAs, with 45-120 SIAs per LGA between 2000 and 2017).

NID = National Immunisation Day; sNID = sub-National Immunisation Day; IPD = Immunisation-Plus Day; sIPD = sub-national Immunisation-Plus Day; MNCHW = Maternal, Neonatal, and Child Health Week; SIA = Supplementary Immunisation Activity; LGA = Local Government Area. "Mop-up" campaigns include revaccination and outbreak response campaigns. Over-/under-count refers to ability to match LGAs in accordance with SIA register of the World Health Organization, with over-count being displayed as negative values (i.e. representing excess LGA count).

**Table 1: Variable Summary**

| Variable Name                                                  | Variable Description                                              | N      | Mean     | Std. Dev. | Min  | Max | Unique Values |    |
|----------------------------------------------------------------|-------------------------------------------------------------------|--------|----------|-----------|------|-----|---------------|----|
| <b>Outcome Variables: Childhood vaccination</b>                |                                                                   |        |          |           |      |     |               |    |
| VAC                                                            | Full vaccination (excl. polio & hepatitis B) [1 = yes]            | 69,376 | 0.27     | 0.44      | 0    | 1   | 2             |    |
| VAC_norep                                                      | Full vaccination (excl. polio & hepatitis B, health card only) [1 | 18,792 | 0.44     | 0.5       | 0    | 1   | 2             |    |
| <b>Outcome Variables: Pregnancy health service utilisation</b> |                                                                   |        |          |           |      |     |               |    |
| MOT_ANC                                                        | Number of antenatal visits during pregnancy                       | 55,790 | 4.57     | 5.07      | 0    | 29  | 30            |    |
| MOT_TET                                                        | Number of tetanus toxoid injections before birth                  | 57,962 | 1.31     | 1.32      | 0    | 9   | 10            |    |
| MOT_DEL_home                                                   | Place of delivery: home [1 = yes]                                 | 87,532 | 0.65     | 0.48      | 0    | 1   | 2             |    |
| MOT_DEL_priv                                                   | Place of delivery: private healthcare provider [1 = yes]          | 87,532 | 0.12     | 0.32      | 0    | 1   | 2             |    |
| MOT_DEL_pub                                                    | Place of delivery: public healthcare provider [1 = yes]           | 87,532 | 0.24     | 0.42      | 0    | 1   | 2             |    |
| <b>Outcome Variables: Child survival</b>                       |                                                                   |        |          |           |      |     |               |    |
| CHI_ALIVE                                                      | Child is alive [1 = alive]                                        | 88,881 | 0.9      | 0.3       | 0    | 1   | 2             |    |
| <b>Key Independent Variables: SIA Exposure</b>                 |                                                                   |        |          |           |      |     |               |    |
| EXP_CHI                                                        | SIA exposure since birth (exact date)                             | 58,453 | 11.11    | 9.71      | 0    | 42  | 43            |    |
| EXP_CHI_nod                                                    | SIA exposure since birth (approx. date)                           | 88,881 | 11.34    | 9.85      | 0    | 42  | 43            |    |
| EXP_CHI_RI                                                     | SIA exposure since birth (exact date, RI period)                  | 58,453 | 3.89     | 2.33      | 0    | 11  | 13            |    |
| EXP_CHI_RI_nod                                                 | SIA exposure since birth (approx. date, RI period)                | 88,881 | 3.73     | 2.44      | 0    | 10  | 13            |    |
| EXP_CHI_FU                                                     | SIA exposure since birth (exact date, follow-up period)           | 58,453 | 7.5      | 8.42      | 0    | 37  | 38            |    |
| EXP_CHI_FU_nod                                                 | SIA exposure since birth (approx. date, follow-up period)         | 88,881 | 7.77     | 8.53      | 0    | 37  | 38            |    |
| EXP_PREG                                                       | SIA exposure during pregnancy (exact date)                        | 58,453 | 3.67     | 2.01      | 0    | 9   | 12            |    |
| EXP_PREG_nod                                                   | SIA exposure during pregnancy (approximate date)                  | 88,881 | 3.83     | 2.12      | 0    | 9   | 12            |    |
| EXP_TOT_nod                                                    | Total SIA exposure pre- & post-birth (approximate date)           | 88,881 | 15.2     | 10.76     | 0    | 48  | 49            |    |
| <b>Other Control Variables</b>                                 |                                                                   |        |          |           |      |     |               |    |
| CHI_AGE                                                        | Age of child (months)                                             | 88,881 | 28.29    | 17.35     | 0    | 60  | 61            |    |
| CHI_ORD                                                        | Birth order of child                                              | 88,881 | 4.01     | 2.6       | 1    | 18  | 18            |    |
| CHI_SEX                                                        | Sex of child [1 = female]                                         | 88,881 | 0.49     | 0.5       | 0    | 1   | 2             |    |
| MOT_AWE                                                        | Child has health card [1 = yes]                                   | 68,957 | 0.52     | 0.5       | 0    | 1   | 2             |    |
| MOT_AGE                                                        | Age of mother at birth (years)                                    | 88,881 | 27.1     | 6.9       | 12   | 49  | 38            |    |
| MOT_EDM                                                        | Mother's highest year of education                                | 88,842 | 2.43     | 2.64      | 0    | 10  | 10            |    |
| MOT_EDF                                                        | Husband/partner's highest year of education                       | 84,741 | 3.01     | 2.7       | 0    | 9   | 10            |    |
| HH_REL                                                         | Mother's religion                                                 | 88,565 | Catholic | 0.08      | 0.28 | 0   | 1             | 5  |
|                                                                | (categorical variable) Other Christian                            |        | 0.3      | 0.46      | 0    | 1   |               |    |
|                                                                | Islam                                                             |        | 0.6      | 0.49      | 0    | 1   |               |    |
|                                                                | Traditionalist                                                    |        | 0.01     | 0.1       | 0    | 1   |               |    |
|                                                                | Other                                                             |        | 0        | 0.05      | 0    | 1   |               |    |
| HH_ETH                                                         | Mother's ethnicity                                                | 88,646 | Eko      | 0.01      | 0.08 | 0   | 1             | 11 |
|                                                                | (categorical variable) Fulani                                     |        | 0.09     | 0.29      | 0    | 1   |               |    |
|                                                                | Hausa                                                             |        | 0.32     | 0.47      | 0    | 1   |               |    |
|                                                                | Ibibio                                                            |        | 0.01     | 0.12      | 0    | 1   |               |    |
|                                                                | Igala                                                             |        | 0.01     | 0.1       | 0    | 1   |               |    |
|                                                                | Igbo                                                              |        | 0.11     | 0.31      | 0    | 1   |               |    |
|                                                                | Ijaw / Izon                                                       |        | 0.03     | 0.17      | 0    | 1   |               |    |
|                                                                | Kanuri / Beriberi                                                 |        | 0.02     | 0.15      | 0    | 1   |               |    |
| Tiv                                                            | 0.02                                                              | 0.14   | 0        | 1         |      |     |               |    |
| HH_SIZ                                                         | Number of household members                                       | 88,881 | 7.13     | 3.68      | 1    | 43  | 37            |    |
|                                                                | Household asset wealth (out of 12 assets)                         | 88,881 | 3.62     | 2.5       | 0    | 12  | 13            |    |
| HH_WEA                                                         | Household asset wealth (out of 12 assets)                         | 88,881 | 3.62     | 2.5       | 0    | 12  | 13            |    |
| INF_RUR                                                        | Rural/urban residence [1 = rural]                                 | 88,881 | 0.69     | 0.46      | 0    | 1   | 2             |    |
| YEAR                                                           | Survey year                                                       | 88,881 | 2003     | 0.02      | 0.15 | 0   | 1             | 4  |
|                                                                | (categorical variable) 2008                                       |        | 0.29     | 0.45      | 0    | 1   |               |    |
|                                                                | 2013                                                              |        | 0.35     | 0.48      | 0    | 1   |               |    |
|                                                                | 2018                                                              |        | 0.34     | 0.47      | 0    | 1   |               |    |
| SIA intensity                                                  | LGA above [2] or below [1] median total no. of SIAs 2000-2017     | 88,881 | 1.66     | 0.47      | 1    | 2   | 2             |    |

Table 2: Model overview

|                                             |                         | Childhood vaccination<br>(Table 1) |                   | Pregnancy health service utilisation<br>(Table 2) |                   |                                             |                   | Child survival<br>(Table 3) |                   |
|---------------------------------------------|-------------------------|------------------------------------|-------------------|---------------------------------------------------|-------------------|---------------------------------------------|-------------------|-----------------------------|-------------------|
|                                             |                         | VAC                                |                   | MOT_ANC<br>MOT_TET                                |                   | MOT_DEL_home<br>MOT_DEL_priv<br>MOT_DEL_pub |                   | CHI_ALIVE                   |                   |
| Outcome variables:                          |                         |                                    |                   |                                                   |                   |                                             |                   |                             |                   |
| Functional form:                            |                         | Logistic regression                |                   | Linear regression                                 |                   | Logistic regression                         |                   | Logistic regression         |                   |
| Analysis:                                   |                         | Main results                       | Robustness checks | Main results                                      | Robustness checks | Main results                                | Robustness checks | Main results                | Robustness checks |
| Key independent variables                   | EXP_CHI                 | ■                                  | ■                 |                                                   |                   |                                             |                   |                             |                   |
|                                             | EXP_CHI_RI              | ■                                  | ■                 |                                                   |                   |                                             |                   |                             |                   |
|                                             | EXP_CHI_FU              | ■                                  | ■                 |                                                   |                   |                                             |                   |                             |                   |
|                                             | EXP_CHI_nod             |                                    |                   |                                                   |                   |                                             |                   | ■                           | ■                 |
|                                             | EXP_CHI_RI_nod          |                                    |                   |                                                   |                   |                                             |                   |                             |                   |
|                                             | EXP_CHI_FU_nod          |                                    |                   |                                                   |                   |                                             |                   |                             |                   |
|                                             | EXP_PREG                |                                    |                   | ■                                                 | ■                 | ■                                           | ■                 |                             |                   |
|                                             | EXP_PREG_nod            |                                    |                   |                                                   | ■                 |                                             | ■                 | ■                           | ■                 |
|                                             | EXP_TOT_nod             |                                    |                   |                                                   |                   |                                             |                   | ■                           | ■                 |
|                                             | EXPxYR                  | ■                                  | ■                 | ■                                                 | ■                 | ■                                           | ■                 |                             |                   |
|                                             | EXPxAGE                 | ■                                  | ■                 |                                                   |                   |                                             |                   |                             |                   |
|                                             | EXPxAGExYEAR            | ■                                  | ■                 |                                                   |                   |                                             |                   |                             |                   |
|                                             | Other control variables | CHI_AGE                            | ■                 | ■                                                 |                   |                                             |                   |                             | ■                 |
| CHI_AGE <sup>2</sup>                        |                         | ■                                  | ■                 |                                                   |                   |                                             |                   | ■                           | ■                 |
| CHI_ORD                                     |                         | ■                                  | ■                 |                                                   |                   |                                             |                   | ■                           | ■                 |
| CHI_SEX                                     |                         | ■                                  | ■                 |                                                   |                   |                                             |                   | ■                           | ■                 |
| MOT_ANC                                     |                         | ■                                  | ■                 |                                                   |                   | ■                                           | ■                 | ■                           | ■                 |
| MOT_AWE                                     |                         | ■                                  | ■                 | ■                                                 | ■                 | ■                                           | ■                 |                             |                   |
| MOT_AGE                                     |                         | ■                                  | ■                 | ■                                                 | ■                 | ■                                           | ■                 | ■                           | ■                 |
| MOT_EDM                                     |                         | ■                                  | ■                 |                                                   |                   |                                             |                   | ■                           | ■                 |
| MOT_EDF                                     |                         | ■                                  | ■                 |                                                   |                   |                                             |                   | ■                           | ■                 |
| HH_REL                                      |                         | ■                                  | ■                 |                                                   |                   |                                             |                   | ■                           | ■                 |
| HH_ETH                                      |                         | ■                                  | ■                 |                                                   |                   |                                             |                   | ■                           | ■                 |
| HH_SIZ                                      |                         | ■                                  | ■                 |                                                   |                   |                                             |                   | ■                           | ■                 |
| HH_WEA                                      |                         | ■                                  | ■                 |                                                   |                   |                                             |                   | ■                           | ■                 |
| INF_RUR                                     |                         | ■                                  | ■                 |                                                   |                   |                                             |                   | ■                           | ■                 |
| YEAR                                        |                         | ■                                  | ■                 |                                                   |                   |                                             |                   | ■                           | ■                 |
| LGA random effect                           |                         | ■                                  | ■                 | ■                                                 | ■                 | ■                                           | ■                 | ■                           | ■                 |
| State random effect                         |                         |                                    |                   |                                                   |                   |                                             |                   |                             |                   |
| Fixed effects                               |                         |                                    |                   |                                                   |                   |                                             |                   |                             |                   |
| Decomposition of SIAs                       |                         |                                    |                   |                                                   |                   |                                             |                   |                             |                   |
| Stratification by region                    |                         |                                    |                   |                                                   |                   |                                             |                   |                             |                   |
| Stratification by survey round              |                         |                                    |                   |                                                   |                   |                                             |                   |                             |                   |
| Exclusion of 2018 round                     |                         |                                    |                   |                                                   |                   |                                             |                   |                             |                   |
| Non-polio/mealses RI outcome                |                         |                                    |                   |                                                   |                   |                                             |                   |                             |                   |
| Alternative reporting<br>(health card only) |                         |                                    |                   |                                                   |                   |                                             |                   |                             |                   |

**Table 3: Main results: Link between SIA exposure and routine childhood immunisation uptake**

| <i>Dependent variable: non-polio full immunisation status</i> | Full model                    | Interaction model (EXPxAGE)   | Exposure decomposition        |
|---------------------------------------------------------------|-------------------------------|-------------------------------|-------------------------------|
| EXP_CHI                                                       | -0.024***<br>[-0.036, -0.012] | 0.012<br>[-0.009, 0.034]      |                               |
| EXP_CHI_RI                                                    |                               |                               | -0.024*<br>[-0.048, 0.000]    |
| EXP_CHI_FU                                                    |                               |                               | -0.024***<br>[-0.037, -0.010] |
| EXPxAGE                                                       |                               | -0.001***<br>[-0.001, -0.001] |                               |
| EXPxYR<br>[yr = 2008]                                         |                               |                               |                               |
| EXPxYR<br>[yr = 2013]                                         |                               |                               |                               |
| EXPxYR<br>[yr = 2018]                                         |                               |                               |                               |
| AGExYR<br>[yr = 2008]                                         |                               |                               |                               |
| AGExYR<br>[yr = 2013]                                         |                               |                               |                               |
| AGExYR<br>[yr = 2018]                                         |                               |                               |                               |
| EXPxAGExYR<br>[yr = 2008]                                     |                               |                               |                               |
| EXPxAGExYR<br>[yr = 2013]                                     |                               |                               |                               |
| EXPxAGExYR<br>[yr = 2018]                                     |                               |                               |                               |
| CHI_AGE                                                       | 0.078***<br>[0.063, 0.093]    | 0.038***<br>[0.031, 0.044]    | 0.078***<br>[0.063, 0.093]    |
| CHI_AGE2                                                      | -0.001***<br>[-0.001, -0.001] |                               | -0.001***<br>[-0.001, -0.001] |
| Level 1 Observations (child)                                  | 24381                         | 24381                         | 24381                         |
| Level 2 Observations (LGA)                                    | 684                           | 684                           | 684                           |
| Akaike Information Criterion                                  | 18030.298                     | 18055.959                     | 18032.469                     |
| Prob. > $\chi^2$                                              | <0.001                        | <0.001                        | <0.001                        |

95% confidence intervals in brackets

\* p &lt; 0.10, \*\* p &lt; 0.05, \*\*\* p &lt; 0.01

**Table 4: Main results: Link between SIA exposure and maternal health service uptake**

| <i>Dependent variables: various indicators of maternal healthcare access (see right)</i> | Delivery                 |                               |                          | Antenatal care               |                           |
|------------------------------------------------------------------------------------------|--------------------------|-------------------------------|--------------------------|------------------------------|---------------------------|
|                                                                                          | At home                  | At private facility           | At public facility       | No. of antenatal care visits | No. of tetanus injections |
| EXP_PREG                                                                                 | 0.007<br>[-0.013, 0.027] | -0.065***<br>[-0.093, -0.036] | 0.010<br>[-0.009, 0.029] | -0.025*<br>[-0.054, 0.003]   | 0.001<br>[-0.008, 0.009]  |
| Level 1 Observations (child)                                                             | 34713                    | 34713                         | 34713                    | 35019                        | 36585                     |
| Level 2 Observations (LGA)                                                               | 686                      | 686                           | 686                      | 686                          | 687                       |
| Akaike Information Criterion                                                             | 26422.845                | 17601.384                     | 30318.818                | 193640.288                   | 111227.001                |
| Prob. > $\chi^2$                                                                         | <0.001                   | <0.001                        | <0.001                   | <0.001                       | <0.001                    |

95% confidence intervals in brackets

\* p &lt; 0.10, \*\* p &lt; 0.05, \*\*\* p &lt; 0.01

**Table 5: Main results: Link between SIA exposure and child survival**

| <i>Dependent variable: Child survival</i>        | Exposure decomposition        | Total exposure                |
|--------------------------------------------------|-------------------------------|-------------------------------|
| EXP_PREG_nod<br>(date approximation)             | -0.012<br>[-0.034, 0.010]     |                               |
| EXP_CHI_nod<br>(date approximation)              | -0.019***<br>[-0.029, -0.009] |                               |
| EXP_TOT_nod (total exposure, date approximation) |                               | -0.018***<br>[-0.027, -0.009] |
| Level 1 Observations (child)                     | 52431                         | 52431                         |
| Level 2 Observations (LGA)                       | 689                           | 689                           |
| <i>Akaike Information Criterion</i>              | 23684.534                     | 23682.853                     |
| Prob. > $\chi^2$                                 | <0.001                        | <0.001                        |

95% confidence intervals in brackets

\* p &lt; 0.10, \*\* p &lt; 0.05, \*\*\* p &lt; 0.01

**Table 6: Relationship between health system performance and SIA frequency across regions in survey sample.**

| Indicator                                           | Region        |            |            |            |             |            |
|-----------------------------------------------------|---------------|------------|------------|------------|-------------|------------|
|                                                     | North Central | North East | North West | South East | South South | South West |
| Average total number of SIAs at LGA level           | 75.81         | 100.17     | 113.94     | 47.07      | 47.38       | 50.61      |
| Full immunisation status (incl. polio) <sup>a</sup> | 21.9%         | 11.7%      | 8.3%       | 40.6%      | 31.5%       | 33.4%      |
| Child exposure to SIAs                              | 9.11          | 13.01      | 15.06      | 4.78       | 4.71        | 5.34       |
| Mother's exposure to SIAs in pregnancy              | 3.28          | 4.42       | 5.07       | 1.89       | 1.87        | 2.07       |
| Mother's average no. of ANC visits                  | 4.68          | 2.78       | 2.3        | 8.16       | 6.35        | 10.75      |
| Average place of delivery: home                     | 49.5%         | 80.1%      | 87.2%      | 17.8%      | 50.4%       | 23.2%      |
| Average place of delivery: private facility         | 16.5%         | 1.5%       | 1.5%       | 45.5%      | 15.6%       | 29.3%      |
| Average place of delivery: public facility          | 34.0%         | 18.4%      | 11.3%      | 36.8%      | 34.0%       | 47.4%      |
| Average survival of children under 5 years          | 91.8%         | 89.6%      | 87.4%      | 91.9%      | 93.1%       | 94.1%      |
| Mothers' average years of education                 | 3.05          | 1.49       | 1.16       | 4.57       | 4.42        | 4.25       |
| Average household wealth index                      | 3.88          | 2.54       | 2.93       | 4.96       | 4.75        | 5.1        |

*Notes.* Derived from DHS data. Unweighted statistics aggregated firstly at LGA and secondly at regional level, comprising full sample of children born between Oct 2000 and Dec 2017. ANC = antenatal care; DHS = Demographic and Health Survey; LGA = local government area; SIA = Supplementary Immunisation Activity.

<sup>a</sup> Full immunisation status for children aged between 10 and 60 months, including at least 1 dose of BCG, 3 doses of DPT, 1 dose of measles vaccine, and three doses of oral polio vaccine.



Table 7: Detailed results: Link between SIA exposure and child/maternal health outcomes, stratified by region.

| North Central                                    | Non-polio full immunisation   |                              | Delivery                      |                               |                               | Antenatal care                |                               | Child survival                |                               |
|--------------------------------------------------|-------------------------------|------------------------------|-------------------------------|-------------------------------|-------------------------------|-------------------------------|-------------------------------|-------------------------------|-------------------------------|
|                                                  | Full model                    | Interaction model (EXPxAGE)  | At home                       | At private facility           | At public facility            | No. of antenatal care visits  | No. of tetanus injections     | Exposure decomposition        | Total exposure                |
| EXP_CHI                                          | 0.026*<br>[-0.004, 0.056]     | 0.054**<br>[0.009, 0.100]    |                               |                               |                               |                               |                               |                               |                               |
| EXPxAGE                                          |                               | -0.001**<br>[-0.002, -0.000] |                               |                               |                               |                               |                               |                               |                               |
| EXP_PREG                                         |                               |                              | 0.003<br>[-0.036, 0.042]      | -0.015<br>[-0.061, 0.031]     | 0.002<br>[-0.034, 0.038]      | 0.034<br>[-0.030, 0.097]      | 0.003<br>[-0.015, 0.021]      |                               |                               |
| EXP_PREG_nod<br>(date approximation)             |                               |                              |                               |                               |                               |                               |                               | -0.019<br>[-0.076, 0.037]     |                               |
| EXP_CHI_nod<br>(date approximation)              |                               |                              |                               |                               |                               |                               |                               | 0.030*<br>[-0.001, 0.061]     |                               |
| EXP_TOT_nod (total exposure, date approximation) |                               |                              |                               |                               |                               |                               |                               |                               | 0.018<br>[-0.008, 0.044]      |
| CHI_AGE                                          | 0.056***<br>[0.025, 0.087]    | 0.017**<br>[0.001, 0.033]    |                               |                               |                               |                               |                               | -0.003<br>[-0.027, 0.022]     | -0.005<br>[-0.029, 0.018]     |
| CHI_AGE2                                         | -0.001***<br>[-0.001, -0.000] |                              |                               |                               |                               |                               |                               | 0.000                         | 0.000                         |
| CHI_ORD                                          | -0.035<br>[-0.088, 0.019]     | -0.034<br>[-0.087, 0.019]    |                               |                               |                               |                               |                               | -0.157***<br>[-0.220, -0.095] | -0.158***<br>[-0.221, -0.095] |
| CHI_SEX                                          | -0.077<br>[-0.230, 0.077]     | -0.075<br>[-0.228, 0.079]    |                               |                               |                               |                               |                               | 0.217**<br>[0.031, 0.404]     | 0.218**<br>[0.032, 0.405]     |
| MOT_ANC                                          | 0.093***<br>[0.071, 0.115]    | 0.094***<br>[0.072, 0.115]   | -0.161***<br>[-0.181, -0.142] | 0.061***<br>[0.043, 0.080]    | 0.083***<br>[0.067, 0.100]    |                               |                               | 0.004                         | 0.004                         |
| MOT_EDM                                          | 0.070***<br>[0.035, 0.104]    | 0.070***<br>[0.035, 0.104]   | -0.057***<br>[-0.085, -0.029] | 0.060***<br>[0.025, 0.096]    | 0.031**<br>[0.004, 0.059]     | 0.105***<br>[0.059, 0.151]    | 0.028***<br>[0.012, 0.043]    | 0.021                         | 0.021                         |
| MOT_EDF                                          | 0.005<br>[-0.032, 0.042]      | 0.005<br>[-0.031, 0.042]     | -0.024<br>[-0.053, 0.005]     | 0.029<br>[-0.008, 0.067]      | 0.023<br>[-0.005, 0.052]      | 0.053***<br>[0.016, 0.091]    | 0.008<br>[-0.008, 0.025]      | 0.010                         | 0.010                         |
| MOT_AWE                                          | 2.554***<br>[2.315, 2.793]    | 2.547***<br>[2.309, 2.786]   | -0.660***<br>[-0.809, -0.510] | -0.092<br>[-0.287, 0.102]     | 0.863***<br>[0.709, 1.018]    | 1.760***<br>[1.484, 2.035]    | 0.614***<br>[0.527, 0.701]    |                               |                               |
| MOT_AGE                                          | 0.016*<br>[-0.001, 0.034]     | 0.016*<br>[-0.001, 0.034]    | 0.005<br>[-0.005, 0.015]      | -0.003<br>[-0.016, 0.009]     | -0.003<br>[-0.013, 0.006]     | 0.026***<br>[0.010, 0.043]    | 0.004<br>[-0.002, 0.010]      | 0.010                         | 0.010                         |
| HH_RUR                                           | -0.035<br>[-0.257, 0.186]     | -0.033<br>[-0.255, 0.188]    | 0.750***<br>[0.553, 0.946]    | -0.405***<br>[-0.623, -0.187] | -0.425***<br>[-0.599, -0.251] | -0.559**<br>[-1.103, -0.014]  | -0.096*<br>[-0.201, 0.009]    | -0.079                        | -0.081                        |
| HH_REL (ref: Catholic): Other Christian          | -0.105<br>[-0.373, 0.163]     | -0.105<br>[-0.373, 0.163]    | 0.104<br>[-0.115, 0.324]      | 0.006<br>[-0.235, 0.246]      | -0.106<br>[-0.316, 0.105]     | 0.160<br>[-0.217, 0.536]      | 0.037<br>[-0.096, 0.170]      | 0.164                         | 0.165                         |
| HH_REL (ref: Catholic): Islam                    | -0.371**<br>[-0.674, -0.069]  | -0.370**<br>[-0.673, -0.068] | 0.095<br>[-0.160, 0.350]      | 0.000<br>[-0.289, 0.290]      | -0.094<br>[-0.331, 0.143]     | 0.612***<br>[0.149, 1.074]    | -0.069<br>[-0.232, 0.094]     | 0.118                         | 0.117                         |
| HH_REL (ref: Catholic): Traditionalist           | -0.719<br>[-1.837, 0.399]     | -0.695<br>[-1.811, 0.421]    | 0.277<br>[-0.415, 0.969]      | -0.011<br>[-0.861, 0.839]     | -0.612<br>[-1.424, 0.201]     | -0.985***<br>[-1.728, -0.243] | -0.625***<br>[-0.918, -0.331] | 0.422                         | 0.428                         |
| HH_REL (ref: Catholic): Other                    | 0.000<br>[0.000, 0.000]       | 0.000<br>[0.000, 0.000]      | -0.391<br>[-1.789, 1.007]     | 0.960<br>[-0.656, 2.575]      | -0.172<br>[-1.783, 1.438]     | -0.750<br>[-2.634, 1.134]     | -0.409<br>[-1.097, 0.280]     | 0.022                         | 0.015                         |
| HH_ETH (ref: Ekoi): Fulani                       | -0.085<br>[-0.632, 0.462]     | -0.065<br>[-0.611, 0.481]    | 0.749***<br>[0.286, 1.212]    | -1.294***<br>[-2.219, -0.368] | -0.500**<br>[-0.939, -0.061]  | 0.000<br>[0.000, 0.000]       | 0.000<br>[0.000, 0.000]       | 0.364                         | 0.370                         |
| HH_ETH (ref: Ekoi): Hausa                        | -0.492**<br>[-0.881, -0.104]  | -0.489**<br>[-0.877, -0.101] | 0.854***<br>[0.538, 1.170]    | -0.647***<br>[-1.117, -0.177] | -0.546***<br>[-0.850, -0.243] | 0.657*<br>[-0.026, 1.340]     | 0.305**<br>[0.031, 0.580]     | 0.079                         | 0.078                         |
| HH_ETH (ref: Ekoi): Ibibio                       | -0.624<br>[-2.729, 1.481]     | -0.628<br>[-2.732, 1.477]    | -0.658<br>[-2.862, 1.546]     | 0.903<br>[-0.485, 2.291]      | -0.511<br>[-1.878, 0.856]     | 1.908***<br>[0.643, 3.172]    | 0.364<br>[-0.234, 0.962]      | 0.000                         | 0.000                         |
| HH_ETH (ref: Ekoi): Igala                        | -0.139<br>[-0.531, 0.253]     | -0.141<br>[-0.533, 0.251]    | -0.579***<br>[-0.962, -0.195] | 0.276<br>[-0.102, 0.653]      | 0.418***<br>[0.102, 0.733]    | 1.477***<br>[0.605, 2.349]    | 0.848***<br>[0.551, 1.145]    | 0.019                         | 0.015                         |
| HH_ETH (ref: Ekoi): Igbo                         | -0.163<br>[-0.689, 0.364]     | -0.151<br>[-0.677, 0.374]    | -1.009***<br>[-1.546, -0.471] | 0.672***<br>[0.274, 1.069]    | 0.025<br>[-0.341, 0.391]      | 1.672***<br>[0.809, 2.535]    | 0.249*<br>[-0.043, 0.541]     | 0.217                         | 0.214                         |
| HH_ETH (ref: Ekoi): Ijaw / Izon                  | 0.000<br>[0.000, 0.000]       | 0.000<br>[0.000, 0.000]      | 0.000<br>[0.000, 0.000]       | 0.000<br>[0.000, 0.000]       | 0.000<br>[0.000, 0.000]       | -1.779<br>[-4.231, 0.674]     | 0.427**<br>[0.080, 0.774]     | 0.000                         | 0.000                         |
| HH_ETH (ref: Ekoi): Kanuri / Beriberi            | -0.722<br>[-2.342, 0.898]     | -0.707<br>[-2.327, 0.913]    | 0.647<br>[-0.406, 1.701]      | 0.100<br>[-1.070, 1.270]      | -0.611<br>[-1.666, 0.444]     | 2.708**<br>[0.535, 4.880]     | 0.213<br>[-0.284, 0.710]      | -0.902*<br>[-1.967, 0.162]    | -0.888<br>[-1.952, 0.176]     |
| HH_ETH (ref: Ekoi): Tiv                          | -0.116<br>[-0.491, 0.260]     | -0.118<br>[-0.493, 0.257]    | -0.808***<br>[-1.135, -0.481] | 0.945***<br>[0.578, 1.312]    | 0.095<br>[-0.207, 0.398]      | 0.824**<br>[0.013, 1.635]     | 0.218*<br>[-0.009, 0.445]     | 0.088                         | 0.084                         |
| HH_ETH (ref: Ekoi): Yoruba                       | 0.183<br>[-0.145, 0.511]      | 0.191<br>[-0.137, 0.518]     | -0.267<br>[-0.587, 0.052]     | 0.600***<br>[0.297, 0.904]    | -0.310**<br>[-0.568, -0.051]  | 2.871***<br>[2.117, 3.624]    | 0.472***<br>[0.214, 0.731]    | 0.301                         | 0.305                         |
| HH_ETH (ref: Ekoi): Other                        | 0.000<br>[0.000, 0.000]       | 0.000<br>[0.000, 0.000]      | 0.000<br>[0.000, 0.000]       | 0.000<br>[0.000, 0.000]       | 0.000<br>[0.000, 0.000]       | 1.335***<br>[0.666, 2.004]    | 0.516***<br>[0.319, 0.713]    | 0.000                         | 0.000                         |
| HH_SIZ                                           | -0.012<br>[-0.037, 0.014]     | -0.012<br>[-0.038, 0.013]    | 0.007<br>[-0.012, 0.025]      | 0.003<br>[-0.020, 0.027]      | -0.007<br>[-0.026, 0.011]     | -0.067***<br>[-0.098, -0.036] | -0.014***<br>[-0.022, -0.005] | 0.113***<br>[0.076, 0.149]    | 0.113***<br>[0.076, 0.150]    |
|                                                  | 0.150***                      | 0.149***                     | -0.182***                     | 0.088***                      | 0.116***                      | 0.304***                      | 0.055***                      | 0.015                         | 0.015                         |

|                                            |                  |                  |                  |                  |                  |                            |                            |                 |                 |
|--------------------------------------------|------------------|------------------|------------------|------------------|------------------|----------------------------|----------------------------|-----------------|-----------------|
| HH_WEA                                     | [0.107, 0.193]   | [0.106, 0.192]   | [-0.218, -0.146] | [0.046, 0.129]   | [0.082, 0.149]   | [0.225, 0.384]             | [0.032, 0.078]             | [-0.035, 0.065] | [-0.036, 0.065] |
|                                            | 0.988***         | 0.989***         | -0.331*          | -0.344*          | 0.562***         | -1.690***                  | -0.205                     | 0.183           | 0.170           |
| YEAR (ref: 2003): 2008                     | [0.475, 1.501]   | [0.474, 1.504]   | [-0.691, 0.029]  | [-0.742, 0.053]  | [0.209, 0.915]   | [-2.851, -0.529]           | [-0.486, 0.077]            | [-0.301, 0.667] | [-0.314, 0.653] |
|                                            | 0.818***         | 0.837***         | -0.433**         | -0.216           | 0.537***         | -1.049*                    | -0.120                     | 0.412           | 0.406           |
| YEAR (ref: 2003): 2013                     | [0.311, 1.326]   | [0.328, 1.345]   | [-0.792, -0.075] | [-0.607, 0.175]  | [0.189, 0.886]   | [-2.289, 0.191]            | [-0.393, 0.153]            | [-0.093, 0.917] | [-0.098, 0.911] |
|                                            | 1.134***         | 1.183***         | -0.775***        | -0.072           | 0.787***         | -2.272***                  | -0.304**                   | 0.398           | 0.376           |
| YEAR (ref: 2003): 2018                     | [0.609, 1.659]   | [0.660, 1.707]   | [-1.150, -0.400] | [-0.488, 0.343]  | [0.421, 1.153]   | [-3.442, -1.101]           | [-0.579, -0.030]           | [-0.090, 0.886] | [-0.111, 0.863] |
|                                            | -5.527***        | -5.158***        | 1.901***         | -2.371***        | -2.459***        | 1.800***                   | 0.579***                   | 1.877***        | 1.829***        |
| Constant                                   | [-6.348, -4.707] | [-5.930, -4.386] | [1.358, 2.444]   | [-3.004, -1.737] | [-2.986, -1.932] | [0.559, 3.042]             | [0.175, 0.983]             | [1.097, 2.657]  | [1.053, 2.606]  |
|                                            | 0.172***         | 0.172***         | 0.338***         | 0.410***         | 0.186***         | 0.030                      | -1.683***                  | 0.000           | 0.000           |
| Multilevel variance parameter: Level 1     | [0.066, 0.279]   | [0.066, 0.278]   | [0.185, 0.490]   | [0.193, 0.628]   | [0.090, 0.283]   | [-0.159, 0.219]            | [-2.031, -1.334]           | [-0.000, 0.000] | [-0.000, 0.000] |
| Multilevel variance parameter:<br>Residual |                  |                  |                  |                  |                  | 1.263***<br>[1.193, 1.333] | 0.254***<br>[0.199, 0.309] |                 |                 |
| Observations (Level 2)                     | 4342             | 4342             | 6071             | 6071             | 6071             | 6103                       | 6293                       | 9028            | 9028            |
| Observations (Level 1)                     | 113              | 113              | 113              | 113              | 113              | 113                        | 113                        | 113             | 113             |
| Akaike Information Criterion               | 4152.478         | 4159.676         | 6199.652         | 4691.431         | 6657.883         | 32962.923                  | 21185.627                  | 3710.053        | 3710.113        |
| Prob. > $\chi^2$                           | <0.001           | <0.001           | <0.001           | <0.001           | <0.001           | <0.001                     | <0.001                     | <0.001          | <0.001          |

| North East                                       | Non-polio full immunisation   |                               | Delivery                      |                            |                               | Antenatal care                |                               | Child survival                |                               |
|--------------------------------------------------|-------------------------------|-------------------------------|-------------------------------|----------------------------|-------------------------------|-------------------------------|-------------------------------|-------------------------------|-------------------------------|
|                                                  | Full model                    | Interaction model (EXPxAGE)   | At home                       | At private facility        | At public facility            | No. of antenatal care visits  | No. of tetanus injections     | Exposure decomposition        | Total exposure                |
| EXP_CHI                                          | -0.074***<br>[-0.106, -0.042] | -0.058**<br>[-0.104, -0.013]  |                               |                            |                               |                               |                               |                               |                               |
| EXPxAGE                                          |                               | 0.000<br>[-0.001, 0.001]      |                               |                            |                               |                               |                               |                               |                               |
| EXP_PREG                                         |                               |                               | -0.025<br>[-0.067, 0.017]     | 0.024<br>[-0.103, 0.151]   | 0.018<br>[-0.024, 0.060]      | 0.015<br>[-0.026, 0.055]      | 0.001<br>[-0.017, 0.019]      |                               |                               |
| EXP_PREG_nod (date approximation)                |                               |                               |                               |                            |                               |                               |                               | 0.019<br>[-0.022, 0.060]      |                               |
| EXP_CHI_nod (date approximation)                 |                               |                               |                               |                            |                               |                               |                               | 0.005<br>[-0.020, 0.029]      |                               |
| EXP_TOT_nod (total exposure, date approximation) |                               |                               |                               |                            |                               |                               |                               |                               | 0.008<br>[-0.013, 0.030]      |
| CHI_AGE                                          | 0.085***<br>[0.043, 0.128]    | 0.054***<br>[0.032, 0.077]    |                               |                            |                               |                               |                               | -0.014<br>[-0.035, 0.008]     | -0.014<br>[-0.035, 0.007]     |
| CHI_AGE2                                         | -0.001*<br>[-0.001, 0.000]    |                               |                               |                            |                               |                               |                               | 0.000<br>[-0.000, 0.000]      | 0.000<br>[-0.000, 0.000]      |
| CHI_ORD                                          | -0.072**<br>[-0.135, -0.010]  | -0.073**<br>[-0.136, -0.011]  |                               |                            |                               |                               |                               | -0.139***<br>[-0.186, -0.093] | -0.139***<br>[-0.186, -0.093] |
| CHI_SEX                                          | 0.026<br>[-0.163, 0.215]      | 0.024<br>[-0.165, 0.213]      |                               |                            |                               |                               |                               | 0.271***<br>[0.121, 0.421]    | 0.271***<br>[0.121, 0.420]    |
| MOT_ANC                                          | 0.144***<br>[0.109, 0.179]    | 0.144***<br>[0.109, 0.179]    | -0.218***<br>[-0.244, -0.192] | 0.134***<br>[0.069, 0.200] | 0.203***<br>[0.178, 0.229]    |                               |                               | 0.003<br>[-0.026, 0.031]      | 0.003<br>[-0.026, 0.031]      |
| MOT_EDM                                          | 0.072***<br>[0.030, 0.115]    | 0.071***<br>[0.029, 0.114]    | -0.083***<br>[-0.114, -0.051] | 0.120***<br>[0.030, 0.210] | 0.072***<br>[0.040, 0.104]    | 0.092***<br>[0.054, 0.130]    | 0.030***<br>[0.016, 0.044]    | -0.009<br>[-0.050, 0.031]     | -0.009<br>[-0.049, 0.031]     |
| MOT_EDF                                          | 0.006<br>[-0.036, 0.048]      | 0.006<br>[-0.036, 0.047]      | -0.028*<br>[-0.059, 0.003]    | 0.020<br>[-0.072, 0.112]   | 0.031*<br>[-0.000, 0.062]     | 0.104***<br>[0.071, 0.137]    | 0.029***<br>[0.013, 0.044]    | 0.038**<br>[0.002, 0.074]     | 0.038**<br>[0.003, 0.074]     |
| MOT_AWE                                          | 2.870***<br>[2.563, 3.177]    | 2.872***<br>[2.565, 3.179]    | -0.834***<br>[-0.998, -0.669] | 0.801***<br>[0.290, 1.311] | 0.806***<br>[0.640, 0.973]    | 1.847***<br>[1.626, 2.068]    | 0.740***<br>[0.663, 0.818]    |                               |                               |
| MOT_AGE                                          | 0.031***<br>[0.008, 0.055]    | 0.031***<br>[0.007, 0.055]    | 0.007<br>[-0.004, 0.019]      | 0.012<br>[-0.021, 0.046]   | -0.009<br>[-0.021, 0.003]     | 0.001<br>[-0.009, 0.010]      | 0.000<br>[-0.003, 0.004]      | 0.008<br>[-0.010, 0.026]      | 0.008<br>[-0.010, 0.026]      |
| HH_RUR                                           | -0.159<br>[-0.433, 0.115]     | -0.161<br>[-0.435, 0.114]     | 0.601***<br>[0.388, 0.814]    | 0.123<br>[-0.501, 0.748]   | -0.609***<br>[-0.817, -0.400] | -0.671***<br>[-1.014, -0.328] | -0.312***<br>[-0.443, -0.182] | -0.191<br>[-0.432, 0.050]     | -0.190<br>[-0.430, 0.051]     |
| HH_REL (ref: Catholic): Other Christian          | -0.546<br>[-1.203, 0.112]     | -0.558*<br>[-1.214, 0.098]    | -0.366<br>[-0.866, 0.133]     | 0.534<br>[-0.444, 1.512]   | 0.338<br>[-0.160, 0.836]      | 0.285<br>[-0.279, 0.848]      | 0.114<br>[-0.088, 0.315]      | -0.898**<br>[-1.663, -0.132]  | -0.895**<br>[-1.661, -0.129]  |
| HH_REL (ref: Catholic): Islam                    | -1.072***<br>[-1.741, -0.402] | -1.088***<br>[-1.756, -0.420] | -0.018<br>[-0.531, 0.495]     | 0.105<br>[-0.941, 1.151]   | 0.051<br>[-0.460, 0.562]      | 0.073<br>[-0.518, 0.663]      | 0.050<br>[-0.159, 0.260]      | -0.776**<br>[-1.548, -0.004]  | -0.772**<br>[-1.544, -0.000]  |
| HH_REL (ref: Catholic): Traditionalist           | -1.618**<br>[-3.129, -0.107]  | -1.630**<br>[-3.136, -0.124]  | 0.789<br>[-0.463, 2.042]      | 0.000<br>[0.000, 0.000]    | -0.609<br>[-1.842, 0.624]     | -0.676*<br>[-1.376, 0.024]    | -0.263<br>[-0.583, 0.056]     | -0.562<br>[-1.751, 0.628]     | -0.560<br>[-1.749, 0.629]     |
| HH_REL (ref: Catholic): Other                    | 0.000<br>[0.000, 0.000]       | 0.000<br>[0.000, 0.000]       | 0.000<br>[0.000, 0.000]       | 0.000<br>[0.000, 0.000]    | 0.000<br>[0.000, 0.000]       | -2.056***<br>[-2.585, -1.526] | -0.787***<br>[-0.978, -0.596] | 0.000<br>[0.000, 0.000]       | 0.000<br>[0.000, 0.000]       |
| HH_ETH (ref: Ekoi): Fulani                       | -0.057<br>[-0.358, 0.245]     | -0.065<br>[-0.366, 0.236]     | -0.039<br>[-0.265, 0.188]     | 0.172<br>[-0.518, 0.861]   | 0.026<br>[-0.201, 0.253]      | 0.000<br>[0.000, 0.000]       | 0.000<br>[0.000, 0.000]       | 0.172<br>[-0.049, 0.393]      | 0.172<br>[-0.049, 0.393]      |
| HH_ETH (ref: Ekoi): Hausa                        | -0.078<br>[-0.382, 0.226]     | -0.082<br>[-0.387, 0.222]     | 0.209*<br>[-0.019, 0.438]     | -0.302<br>[-1.060, 0.455]  | -0.168<br>[-0.396, 0.059]     | 0.552***<br>[0.197, 0.907]    | 0.128**<br>[0.025, 0.231]     | 0.005<br>[-0.224, 0.234]      | 0.004<br>[-0.224, 0.233]      |
| HH_ETH (ref: Ekoi): Ibibio                       | 0.000<br>[0.000, 0.000]       | 0.000<br>[0.000, 0.000]       | 0.000<br>[0.000, 0.000]       | 0.000<br>[0.000, 0.000]    | 0.000<br>[0.000, 0.000]       | -1.698***<br>[-2.025, -1.371] | -0.297***<br>[-0.447, -0.146] | 0.000<br>[0.000, 0.000]       | 0.000<br>[0.000, 0.000]       |
| HH_ETH (ref: Ekoi): Igala                        | 0.000<br>[0.000, 0.000]       | 0.000<br>[0.000, 0.000]       | -0.981<br>[-3.004, 1.041]     | 2.001<br>[-1.253, 5.254]   | 0.221<br>[-1.710, 2.152]      | 0.707<br>[-1.352, 2.765]      | 0.077<br>[-0.733, 0.888]      | -1.173<br>[-3.300, 0.954]     | -1.184<br>[-3.311, 0.943]     |
| HH_ETH (ref: Ekoi): Igbo                         | 0.487<br>[-1.189, 2.162]      | 0.501<br>[-1.172, 2.174]      | 0.000<br>[0.000, 0.000]       | 1.367**<br>[0.048, 2.687]  | 0.292<br>[-0.831, 1.415]      | 3.466***<br>[1.887, 5.045]    | 0.444**<br>[0.091, 0.796]     | -0.922<br>[-2.188, 0.343]     | -0.925<br>[-2.191, 0.341]     |
| HH_ETH (ref: Ekoi): Ijaw / Izon                  | -0.220<br>[-0.684, 0.245]     | -0.218<br>[-0.683, 0.246]     | 0.454***<br>[0.124, 0.784]    | -0.625<br>[-1.938, 0.688]  | -0.405**<br>[-0.732, -0.078]  | -0.059<br>[-0.373, 0.255]     | -0.021<br>[-0.149, 0.107]     | 0.121<br>[-0.183, 0.425]      | 0.123<br>[-0.181, 0.426]      |
| HH_ETH (ref: Ekoi): Kanuri / Beriberi            | -0.200<br>[-1.146, 0.746]     | -0.236<br>[-1.182, 0.710]     | -1.446***<br>[-2.017, -0.874] | -0.044<br>[-1.268, 1.180]  | 1.613***<br>[1.035, 2.191]    | -0.345<br>[-1.423, 0.733]     | -0.123<br>[-0.585, 0.340]     | 0.065<br>[-0.716, 0.847]      | 0.069<br>[-0.712, 0.851]      |
| HH_ETH (ref: Ekoi): Tiv                          | 0.351<br>[-1.116, 1.818]      | 0.367<br>[-1.095, 1.829]      | -0.990<br>[-2.250, 0.270]     | 1.845**<br>[0.224, 3.467]  | 0.112<br>[-1.022, 1.245]      | 0.855<br>[-1.072, 2.783]      | 0.000<br>[-0.583, 0.584]      | 0.000<br>[0.000, 0.000]       | 0.000<br>[0.000, 0.000]       |
| HH_ETH (ref: Ekoi): Yoruba                       |                               |                               |                               |                            |                               |                               |                               |                               |                               |

|                                            |                               |                               |                               |                               |                               |                               |                               |                            |                            |
|--------------------------------------------|-------------------------------|-------------------------------|-------------------------------|-------------------------------|-------------------------------|-------------------------------|-------------------------------|----------------------------|----------------------------|
| HH_ETH (ref: Ekoi): Other                  | 0.000<br>[0.000, 0.000]       | 0.000<br>[0.000, 0.000]       | 0.000<br>[0.000, 0.000]       | 0.000<br>[0.000, 0.000]       | 0.000<br>[0.000, 0.000]       | 0.415***<br>[0.151, 0.679]    | 0.191***<br>[0.085, 0.298]    | 0.000<br>[0.000, 0.000]    | 0.000<br>[0.000, 0.000]    |
| HH_SIZ                                     | -0.022*<br>[-0.047, 0.003]    | -0.021*<br>[-0.047, 0.004]    | 0.032***<br>[0.013, 0.051]    | -0.032<br>[-0.090, 0.027]     | -0.028***<br>[-0.046, -0.009] | -0.015*<br>[-0.033, 0.002]    | -0.007<br>[-0.016, 0.002]     | 0.096***<br>[0.071, 0.121] | 0.096***<br>[0.071, 0.121] |
| HH_WEA                                     | 0.103***<br>[0.050, 0.157]    | 0.103***<br>[0.049, 0.156]    | -0.237***<br>[-0.279, -0.196] | 0.040<br>[-0.073, 0.154]      | 0.230***<br>[0.188, 0.271]    | 0.240***<br>[0.185, 0.295]    | 0.071***<br>[0.051, 0.091]    | 0.033<br>[-0.015, 0.081]   | 0.033<br>[-0.015, 0.081]   |
| YEAR (ref: 2003): 2008                     | 0.788*<br>[-0.031, 1.608]     | 0.799*<br>[-0.024, 1.622]     | 0.726***<br>[0.299, 1.153]    | -1.900***<br>[-2.812, -0.988] | -0.354<br>[-0.790, 0.083]     | 0.217<br>[-0.214, 0.649]      | 0.109<br>[-0.068, 0.286]      | 0.097<br>[-0.318, 0.512]   | 0.108<br>[-0.305, 0.521]   |
| YEAR (ref: 2003): 2013                     | 1.338***<br>[0.525, 2.151]    | 1.358***<br>[0.542, 2.174]    | 0.396*<br>[-0.026, 0.818]     | -1.756***<br>[-2.679, -0.833] | -0.054<br>[-0.484, 0.377]     | 0.217<br>[-0.198, 0.632]      | 0.224**<br>[0.026, 0.421]     | 0.184<br>[-0.247, 0.615]   | 0.193<br>[-0.237, 0.623]   |
| YEAR (ref: 2003): 2018                     | 1.692***<br>[0.865, 2.518]    | 1.741***<br>[0.915, 2.568]    | 0.091<br>[-0.352, 0.534]      | -1.457***<br>[-2.441, -0.473] | 0.258<br>[-0.195, 0.711]      | -0.034<br>[-0.467, 0.400]     | 0.308***<br>[0.110, 0.505]    | 0.115<br>[-0.303, 0.532]   | 0.138<br>[-0.273, 0.548]   |
| Constant                                   | -5.962***<br>[-7.134, -4.790] | -5.653***<br>[-6.771, -4.535] | 2.646***<br>[1.930, 3.362]    | -5.294***<br>[-7.033, -3.555] | -2.948***<br>[-3.666, -2.230] | 1.088***<br>[0.398, 1.778]    | 0.410***<br>[0.106, 0.714]    | 3.024***<br>[2.074, 3.974] | 3.046***<br>[2.099, 3.993] |
| Multilevel variance parameter: Level 1     | 0.158**<br>[0.037, 0.278]     | 0.163***<br>[0.040, 0.286]    | 0.317***<br>[0.160, 0.475]    | 1.656***<br>[0.508, 2.804]    | 0.237***<br>[0.100, 0.374]    | -0.479***<br>[-0.643, -0.316] | -1.597***<br>[-1.924, -1.270] | 0.053*<br>[-0.007, 0.113]  | 0.052*<br>[-0.008, 0.112]  |
| Multilevel variance parameter:<br>Residual |                               |                               |                               |                               |                               | 0.924***<br>[0.864, 0.985]    | 0.079***<br>[0.035, 0.123]    |                            |                            |
| Observations (Level 2)                     | 5017                          | 5017                          | 7350                          | 7304                          | 7370                          | 7387                          | 7479                          | 11269                      | 11269                      |
| Observations (Level 1)                     | 100                           | 100                           | 100                           | 100                           | 100                           | 100                           | 100                           | 101                        | 101                        |
| Akaike Information Criterion               | 2854.824                      | 2857.651                      | 5075.901                      | 966.734                       | 5023.467                      | 34819.738                     | 22572.587                     | 5492.777                   | 5491.124                   |
| Prob. > $\chi^2$                           | <0.001                        | <0.001                        | <0.001                        | <0.001                        | <0.001                        | <0.001                        | <0.001                        | <0.001                     | <0.001                     |

| North West                                       | Non-polio full immunisation  |                             | Delivery                      |                               |                               | Antenatal care                |                               | Child survival                |                               |
|--------------------------------------------------|------------------------------|-----------------------------|-------------------------------|-------------------------------|-------------------------------|-------------------------------|-------------------------------|-------------------------------|-------------------------------|
|                                                  | Full model                   | Interaction model (EXPxAGE) | At home                       | At private facility           | At public facility            | No. of antenatal care visits  | No. of tetanus injections     | Exposure decomposition        | Total exposure                |
| EXP_CHI                                          | -0.076**<br>[-0.151, -0.002] | -0.034<br>[-0.110, 0.042]   |                               |                               |                               |                               |                               |                               |                               |
| EXPxAGE                                          |                              | -0.001*<br>[-0.002, 0.000]  |                               |                               |                               |                               |                               |                               |                               |
| EXP_PREG                                         |                              |                             | -0.015<br>[-0.067, 0.037]     | -0.059<br>[-0.197, 0.080]     | 0.025<br>[-0.028, 0.078]      | 0.025<br>[-0.005, 0.055]      | 0.002<br>[-0.013, 0.017]      |                               |                               |
| EXP_PREG_nod<br>(date approximation)             |                              |                             |                               |                               |                               |                               |                               | -0.008<br>[-0.051, 0.035]     |                               |
| EXP_CHI_nod<br>(date approximation)              |                              |                             |                               |                               |                               |                               |                               | 0.025<br>[-0.011, 0.060]      |                               |
| EXP_TOT_nod (total exposure, date approximation) |                              |                             |                               |                               |                               |                               |                               |                               | 0.013<br>[-0.019, 0.045]      |
| CHI_AGE                                          | 0.105***<br>[0.038, 0.172]   | 0.065***<br>[0.017, 0.114]  |                               |                               |                               |                               |                               | -0.047***<br>[-0.072, -0.021] | -0.043***<br>[-0.068, -0.018] |
| CHI_AGE2                                         | -0.001**<br>[-0.001, -0.000] |                             |                               |                               |                               |                               |                               | 0.000*<br>[-0.000, 0.001]     | 0.000**<br>[0.000, 0.001]     |
| CHI_ORD                                          | -0.063*<br>[-0.129, 0.002]   | -0.063*<br>[-0.129, 0.002]  |                               |                               |                               |                               |                               | -0.162***<br>[-0.200, -0.124] | -0.162***<br>[-0.200, -0.124] |
| CHI_SEX                                          | 0.045<br>[-0.154, 0.245]     | 0.045<br>[-0.154, 0.245]    |                               |                               |                               |                               |                               | 0.126**<br>[0.010, 0.241]     | 0.125**<br>[0.010, 0.241]     |
| MOT_ANC                                          | 0.063***<br>[0.026, 0.099]   | 0.063***<br>[0.027, 0.099]  | -0.203***<br>[-0.228, -0.178] | 0.221***<br>[0.147, 0.296]    | 0.188***<br>[0.162, 0.213]    |                               |                               | 0.015<br>[-0.009, 0.040]      | 0.015<br>[-0.009, 0.040]      |
| MOT_EDM                                          | 0.068***<br>[0.021, 0.114]   | 0.067***<br>[0.021, 0.114]  | -0.058***<br>[-0.091, -0.025] | 0.011<br>[-0.099, 0.120]      | 0.062***<br>[0.028, 0.095]    | 0.127***<br>[0.091, 0.163]    | 0.036***<br>[0.024, 0.049]    | 0.013<br>[-0.021, 0.048]      | 0.013<br>[-0.021, 0.048]      |
| MOT_EDF                                          | 0.029<br>[-0.013, 0.071]     | 0.029<br>[-0.013, 0.071]    | -0.007<br>[-0.039, 0.024]     | -0.043<br>[-0.158, 0.071]     | 0.017<br>[-0.015, 0.048]      | 0.106***<br>[0.083, 0.128]    | 0.034***<br>[0.026, 0.043]    | 0.043***<br>[0.016, 0.070]    | 0.043***<br>[0.015, 0.070]    |
| MOT_AWE                                          | 3.547***<br>[3.265, 3.828]   | 3.543***<br>[3.262, 3.824]  | -0.696***<br>[-0.864, -0.528] | 0.676**<br>[0.030, 1.323]     | 0.688***<br>[0.517, 0.858]    | 1.471***<br>[1.270, 1.673]    | 0.505***<br>[0.428, 0.582]    |                               |                               |
| MOT_AGE                                          | 0.037***<br>[0.012, 0.062]   | 0.037***<br>[0.012, 0.062]  | 0.007<br>[-0.004, 0.019]      | 0.003<br>[-0.036, 0.043]      | -0.009<br>[-0.021, 0.003]     | 0.004<br>[-0.003, 0.011]      | -0.002*<br>[-0.005, 0.000]    | 0.029***<br>[0.014, 0.044]    | 0.029***<br>[0.014, 0.044]    |
| HH_RUR                                           | -0.099<br>[-0.415, 0.218]    | -0.101<br>[-0.417, 0.215]   | 0.777***<br>[0.572, 0.982]    | -0.793**<br>[-1.465, -0.120]  | -0.765***<br>[-0.975, -0.555] | -0.776***<br>[-1.122, -0.429] | -0.260***<br>[-0.382, -0.139] | -0.131<br>[-0.317, 0.055]     | -0.133<br>[-0.319, 0.054]     |
| HH_REL (ref: Catholic): Other Christian          | 0.451<br>[-0.256, 1.157]     | 0.441<br>[-0.266, 1.147]    | -0.394<br>[-0.948, 0.160]     | -0.061<br>[-0.966, 0.845]     | 0.411<br>[-0.133, 0.955]      | 0.504<br>[-0.148, 1.156]      | 0.005<br>[-0.186, 0.195]      | 0.183<br>[-0.565, 0.930]      | 0.180<br>[-0.567, 0.927]      |
| HH_REL (ref: Catholic): Islam                    | -0.326<br>[-1.138, 0.487]    | -0.332<br>[-1.144, 0.479]   | 0.722**<br>[0.116, 1.327]     | -1.716***<br>[-2.973, -0.459] | -0.383<br>[-0.989, 0.224]     | -0.201<br>[-0.859, 0.457]     | -0.190<br>[-0.421, 0.041]     | 0.150<br>[-0.549, 0.850]      | 0.145<br>[-0.554, 0.844]      |
| HH_REL (ref: Catholic): Traditionalist           | -0.677<br>[-2.263, 0.910]    | -0.669<br>[-2.251, 0.913]   | 0.942<br>[-0.244, 2.127]      | 0.236<br>[-2.038, 2.511]      | -0.913<br>[-2.224, 0.398]     | -0.536<br>[-1.263, 0.192]     | -0.253**<br>[-0.496, -0.010]  | 0.132<br>[-0.787, 1.050]      | 0.131<br>[-0.787, 1.049]      |
| HH_REL (ref: Catholic): Other                    | 0.000<br>[0.000, 0.000]      | 0.000<br>[0.000, 0.000]     | 0.000<br>[0.000, 0.000]       | 0.000<br>[0.000, 0.000]       | 0.000<br>[0.000, 0.000]       | 1.210<br>[-0.710, 3.129]      | -0.414***<br>[-0.636, -0.192] | -1.208<br>[-3.688, 1.271]     | -1.195<br>[-3.677, 1.286]     |
| HH_ETH (ref: Ekoi): Fulani                       | 0.087<br>[-0.590, 0.763]     | 0.089<br>[-0.587, 0.766]    | 0.537**<br>[0.041, 1.032]     | -0.375<br>[-1.834, 1.084]     | -0.552**<br>[-1.053, -0.050]  | 0.389***<br>[0.232, 0.546]    | 0.208***<br>[0.138, 0.278]    | 2.211<br>[-0.597, 5.018]      | 2.191<br>[-0.615, 4.996]      |
| HH_ETH (ref: Ekoi): Hausa                        | 0.339<br>[-0.180, 0.859]     | 0.338<br>[-0.181, 0.857]    | 0.474**<br>[0.096, 0.851]     | -0.792<br>[-1.816, 0.233]     | -0.401**<br>[-0.782, -0.021]  | 0.735***<br>[0.581, 0.889]    | 0.333***<br>[0.272, 0.394]    | 1.858<br>[-0.943, 4.659]      | 1.841<br>[-0.959, 4.641]      |
| HH_ETH (ref: Ekoi): Ibibio                       | 0.000<br>[0.000, 0.000]      | 0.000<br>[0.000, 0.000]     | 0.000<br>[0.000, 0.000]       | 0.000<br>[0.000, 0.000]       | 0.000<br>[0.000, 0.000]       | 0.980***<br>[0.667, 1.292]    | -0.492<br>[-2.642, 1.658]     | 0.000<br>[0.000, 0.000]       | 0.000<br>[0.000, 0.000]       |
| HH_ETH (ref: Ekoi): Igala                        | 0.000<br>[0.000, 0.000]      | 0.000<br>[0.000, 0.000]     | 0.000<br>[0.000, 0.000]       | 0.000<br>[0.000, 0.000]       | 0.000<br>[0.000, 0.000]       | 3.909***<br>[3.548, 4.269]    | 2.169***<br>[2.042, 2.296]    | 0.000<br>[0.000, 0.000]       | 0.000<br>[0.000, 0.000]       |
| HH_ETH (ref: Ekoi): Igbo                         | 0.216<br>[-0.866, 1.298]     | 0.209<br>[-0.872, 1.290]    | -1.134*<br>[-2.357, 0.088]    | -0.479<br>[-1.729, 0.772]     | 0.412<br>[-0.482, 1.306]      | 1.275**<br>[0.105, 2.444]     | 0.422***<br>[0.130, 0.714]    | 0.000<br>[0.000, 0.000]       | 0.000<br>[0.000, 0.000]       |
| HH_ETH (ref: Ekoi): Ijaw / Izon                  |                              |                             |                               |                               |                               |                               |                               |                               |                               |
| HH_ETH (ref: Ekoi): Kanuri / Beriberi            | 0.626<br>[-0.630, 1.882]     | 0.641<br>[-0.614, 1.895]    | 1.715**<br>[0.170, 3.259]     | 0.000<br>[0.000, 0.000]       | -1.428*<br>[-2.963, 0.107]    | 1.051***<br>[0.453, 1.649]    | 0.828***<br>[0.349, 1.307]    | 2.261<br>[-0.649, 5.170]      | 2.241<br>[-0.667, 5.149]      |
| HH_ETH (ref: Ekoi): Tiv                          | 0.000<br>[0.000, 0.000]      | 0.000<br>[0.000, 0.000]     | 0.000<br>[0.000, 0.000]       | 1.472<br>[-1.265, 4.208]      | 0.197<br>[-2.515, 2.909]      | 0.694<br>[-0.510, 1.898]      | -0.069<br>[-0.478, 0.339]     | 0.000<br>[0.000, 0.000]       | 0.000<br>[0.000, 0.000]       |
| HH_ETH (ref: Ekoi): Yoruba                       | 0.609<br>[-0.739, 1.958]     | 0.610<br>[-0.736, 1.957]    | -0.492<br>[-1.475, 0.491]     | 0.489<br>[-0.939, 1.918]      | 0.230<br>[-0.676, 1.136]      | 0.606<br>[-0.445, 1.656]      | 0.475***<br>[0.162, 0.787]    | 2.118<br>[-1.034, 5.270]      | 2.107<br>[-1.043, 5.258]      |
|                                                  | 0.000                        | 0.000                       | 0.000                         | 0.000                         | 0.000                         | 0.760***                      | 0.386***                      | 2.275                         | 2.257                         |

|                                            |                  |                  |                  |                  |                  |                  |                  |                 |                 |
|--------------------------------------------|------------------|------------------|------------------|------------------|------------------|------------------|------------------|-----------------|-----------------|
| HH_ETH (ref: Ekoi): Other                  | [0.000, 0.000]   | [0.000, 0.000]   | [0.000, 0.000]   | [0.000, 0.000]   | [0.000, 0.000]   | [0.412, 1.107]   | [0.256, 0.516]   | [-0.546, 5.096] | [-0.563, 5.076] |
|                                            | -0.009           | -0.009           | 0.044***         | -0.012           | -0.038***        | -0.016*          | -0.006*          | 0.122***        | 0.122***        |
| HH_SIZ                                     | [-0.037, 0.020]  | [-0.037, 0.020]  | [0.022, 0.065]   | [-0.081, 0.058]  | [-0.060, -0.017] | [-0.033, 0.001]  | [-0.013, 0.001]  | [0.101, 0.143]  | [0.101, 0.143]  |
|                                            | 0.133***         | 0.133***         | -0.203***        | 0.286***         | 0.170***         | 0.221***         | 0.063***         | -0.005          | -0.005          |
| HH_WEA                                     | [0.080, 0.186]   | [0.080, 0.186]   | [-0.243, -0.163] | [0.166, 0.405]   | [0.130, 0.209]   | [0.183, 0.259]   | [0.048, 0.079]   | [-0.042, 0.031] | [-0.042, 0.031] |
|                                            | 1.387***         | 1.287***         | 0.109            | -0.886*          | 0.023            | -0.710***        | -0.120*          | 0.276           | 0.270           |
| YEAR (ref: 2003): 2008                     | [0.505, 2.270]   | [0.402, 2.172]   | [-0.313, 0.531]  | [-1.808, 0.035]  | [-0.417, 0.462]  | [-1.208, -0.212] | [-0.257, 0.018]  | [-0.075, 0.627] | [-0.081, 0.621] |
|                                            | 1.739***         | 1.575***         | -0.181           | -1.844***        | 0.376*           | -0.523*          | 0.032            | 0.289           | 0.309           |
| YEAR (ref: 2003): 2013                     | [0.753, 2.726]   | [0.593, 2.557]   | [-0.602, 0.239]  | [-2.814, -0.874] | [-0.062, 0.813]  | [-1.053, 0.006]  | [-0.126, 0.190]  | [-0.146, 0.723] | [-0.127, 0.745] |
|                                            | 1.087**          | 1.170***         | -0.450**         | 0.043            | 0.476**          | -0.116           | 0.268***         | 0.272           | 0.207           |
| YEAR (ref: 2003): 2018                     | [0.216, 1.959]   | [0.304, 2.035]   | [-0.872, -0.028] | [-0.846, 0.932]  | [0.037, 0.915]   | [-0.623, 0.391]  | [0.113, 0.424]   | [-0.054, 0.599] | [-0.106, 0.520] |
|                                            | -8.155***        | -7.870***        | 2.044***         | -3.822***        | -2.524***        | 1.132**          | 0.415**          | -0.185          | -0.229          |
| Constant                                   | [-9.559, -6.752] | [-9.212, -6.529] | [1.300, 2.788]   | [-5.669, -1.975] | [-3.287, -1.760] | [0.205, 2.059]   | [0.095, 0.736]   | [-3.118, 2.747] | [-3.160, 2.701] |
|                                            | 0.708***         | 0.705***         | 0.134***         | 0.290            | 0.143***         | -0.338***        | -1.448***        | 0.025           | 0.026           |
| Multilevel variance parameter: Level 1     | [0.391, 1.025]   | [0.389, 1.020]   | [0.038, 0.230]   | [-0.208, 0.789]  | [0.041, 0.244]   | [-0.492, -0.183] | [-1.629, -1.267] | [-0.012, 0.062] | [-0.012, 0.063] |
|                                            |                  |                  |                  |                  |                  | 0.845***         | -0.043*          |                 |                 |
| Multilevel variance parameter:<br>Residual |                  |                  |                  |                  |                  | [0.798, 0.892]   | [-0.094, 0.007]  |                 |                 |
| Observations (Level 2)                     | 7249             | 7249             | 10429            | 10383            | 10432            | 10447            | 10663            | 16552           | 16552           |
| Observations (Level 1)                     | 166              | 166              | 166              | 166              | 166              | 166              | 166              | 166             | 166             |
| Akaike Information Criterion               | 2869.01          | 2870.86          | 5101.199         | 687.393          | 5117.543         | 47639.029        | 29619.064        | 8734.342        | 8734.38         |
| Prob. > $\chi^2$                           | <0.001           | <0.001           | <0.001           | <0.001           | <0.001           | <0.001           | <0.001           | <0.001          | <0.001          |

| South East                                       | Non-polio full immunisation   |                               | Delivery                      |                               |                              | Antenatal care                |                               | Child survival                |                               |
|--------------------------------------------------|-------------------------------|-------------------------------|-------------------------------|-------------------------------|------------------------------|-------------------------------|-------------------------------|-------------------------------|-------------------------------|
|                                                  | Full model                    | Interaction model (EXPxAGE)   | At home                       | At private facility           | At public facility           | No. of antenatal care visits  | No. of tetanus injections     | Exposure decomposition        | Total exposure                |
| EXP_CHI                                          | 0.092<br>[-0.035, 0.220]      | 0.238**<br>[0.056, 0.420]     |                               |                               |                              |                               |                               |                               |                               |
| EXPxAGE                                          |                               | -0.005***<br>[-0.008, -0.002] |                               |                               |                              |                               |                               |                               |                               |
| EXP_PREG                                         |                               |                               | 0.036<br>[-0.062, 0.135]      | 0.020<br>[-0.060, 0.099]      | -0.049<br>[-0.129, 0.030]    | 0.155**<br>[0.001, 0.308]     | 0.010<br>[-0.021, 0.042]      |                               |                               |
| EXP_PREG_nod<br>(date approximation)             |                               |                               |                               |                               |                              |                               |                               | 0.036<br>[-0.116, 0.189]      |                               |
| EXP_CHI_nod<br>(date approximation)              |                               |                               |                               |                               |                              |                               |                               | -0.043<br>[-0.171, 0.085]     |                               |
| EXP_TOT_nod (total exposure, date approximation) |                               |                               |                               |                               |                              |                               |                               |                               | -0.013<br>[-0.126, 0.099]     |
| CHI_AGE                                          | 0.112***<br>[0.069, 0.155]    | 0.048***<br>[0.019, 0.078]    |                               |                               |                              |                               |                               | -0.017<br>[-0.056, 0.022]     | -0.013<br>[-0.052, 0.025]     |
| CHI_AGE2                                         | -0.002***<br>[-0.002, -0.001] |                               |                               |                               |                              |                               |                               | 0.000<br>[-0.000, 0.001]      | 0.000<br>[-0.000, 0.001]      |
| CHI_ORD                                          | -0.037<br>[-0.100, 0.026]     | -0.036<br>[-0.099, 0.027]     |                               |                               |                              |                               |                               | -0.122***<br>[-0.195, -0.048] | -0.122***<br>[-0.195, -0.048] |
| CHI_SEX                                          | -0.149<br>[-0.362, 0.063]     | -0.148<br>[-0.360, 0.065]     |                               |                               |                              |                               |                               | 0.386***<br>[0.127, 0.645]    | 0.383***<br>[0.124, 0.642]    |
| MOT_ANC                                          | 0.030***<br>[0.007, 0.053]    | 0.030***<br>[0.007, 0.053]    | -0.104***<br>[-0.131, -0.077] | 0.037***<br>[0.020, 0.055]    | 0.021**<br>[0.003, 0.038]    |                               |                               | -0.008<br>[-0.033, 0.017]     | -0.007<br>[-0.032, 0.018]     |
| MOT_EDM                                          | 0.055*<br>[-0.004, 0.115]     | 0.055*<br>[-0.004, 0.114]     | -0.075**<br>[-0.132, -0.018]  | -0.027<br>[-0.075, 0.021]     | 0.099***<br>[0.049, 0.148]   | 0.056<br>[-0.061, 0.173]      | 0.040***<br>[0.020, 0.061]    | -0.001<br>[-0.071, 0.069]     | -0.001<br>[-0.071, 0.069]     |
| MOT_EDF                                          | 0.016<br>[-0.046, 0.079]      | 0.016<br>[-0.047, 0.078]      | -0.106***<br>[-0.164, -0.048] | 0.055**<br>[0.003, 0.106]     | 0.036<br>[-0.016, 0.088]     | 0.008<br>[-0.095, 0.111]      | -0.004<br>[-0.032, 0.024]     | 0.024<br>[-0.046, 0.095]      | 0.026<br>[-0.045, 0.096]      |
| MOT_AWE                                          | 2.623***<br>[2.236, 3.011]    | 2.613***<br>[2.226, 3.000]    | -0.974***<br>[-1.244, -0.703] | 0.199<br>[-0.055, 0.452]      | 0.802***<br>[0.520, 1.083]   | 1.372***<br>[0.702, 2.042]    | 0.448***<br>[0.274, 0.621]    |                               |                               |
| MOT_AGE                                          | 0.013<br>[-0.010, 0.036]      | 0.013<br>[-0.011, 0.036]      | -0.020**<br>[-0.037, -0.002]  | -0.001<br>[-0.015, 0.013]     | 0.012*<br>[-0.002, 0.026]    | -0.001<br>[-0.024, 0.022]     | 0.002<br>[-0.003, 0.007]      | -0.019<br>[-0.044, 0.007]     | -0.019<br>[-0.044, 0.007]     |
| HH_RUR                                           | -0.094<br>[-0.343, 0.155]     | -0.102<br>[-0.351, 0.147]     | -0.003<br>[-0.271, 0.264]     | -0.129<br>[-0.333, 0.075]     | 0.181*<br>[-0.020, 0.382]    | -0.018<br>[-0.493, 0.457]     | -0.060<br>[-0.141, 0.020]     | -0.306**<br>[-0.571, -0.041]  | -0.305**<br>[-0.570, -0.041]  |
| HH_REL (ref: Catholic): Other Christian          | -0.110<br>[-0.338, 0.118]     | -0.103<br>[-0.330, 0.125]     | 0.016<br>[-0.221, 0.254]      | -0.189**<br>[-0.366, -0.012]  | 0.206**<br>[0.028, 0.384]    | -0.235<br>[-0.572, 0.103]     | -0.099**<br>[-0.175, -0.023]  | -0.316**<br>[-0.590, -0.041]  | -0.312**<br>[-0.587, -0.038]  |
| HH_REL (ref: Catholic): Islam                    | -0.055<br>[-2.549, 2.440]     | -0.031<br>[-2.503, 2.442]     | -0.726<br>[-3.253, 1.801]     | 1.069<br>[-0.661, 2.798]      | -0.588<br>[-2.638, 1.463]    | 0.705<br>[-2.529, 3.938]      | -0.146<br>[-0.858, 0.567]     | 0.000<br>[0.000, 0.000]       | 0.000<br>[0.000, 0.000]       |
| HH_REL (ref: Catholic): Traditionalist           | -0.235<br>[-0.870, 0.400]     | -0.223<br>[-0.859, 0.412]     | 1.728***<br>[1.049, 2.407]    | -1.829***<br>[-2.694, -0.964] | -0.951**<br>[-1.693, -0.209] | -1.223**<br>[-2.193, -0.254]  | -0.326**<br>[-0.646, -0.005]  | -0.303<br>[-1.031, 0.424]     | -0.299<br>[-1.027, 0.429]     |
| HH_REL (ref: Catholic): Other                    | 0.000<br>[0.000, 0.000]       | 0.000<br>[0.000, 0.000]       | 0.000<br>[0.000, 0.000]       | 0.000<br>[0.000, 0.000]       | 0.000<br>[0.000, 0.000]      | 16.125***<br>[15.152, 17.099] | 1.493***<br>[1.304, 1.683]    | -1.997<br>[-4.770, 0.776]     | -2.025<br>[-4.787, 0.737]     |
| HH_ETH (ref: Ekoi): Fulani                       | 0.000<br>[0.000, 0.000]       | 0.000<br>[0.000, 0.000]       | 0.000<br>[0.000, 0.000]       | 0.000<br>[0.000, 0.000]       | 0.000<br>[0.000, 0.000]      | 0.000<br>[0.000, 0.000]       | 0.000<br>[0.000, 0.000]       | 0.000<br>[0.000, 0.000]       | 0.000<br>[0.000, 0.000]       |
| HH_ETH (ref: Ekoi): Hausa                        | -1.150<br>[-2.979, 0.679]     | -1.069<br>[-2.890, 0.753]     | -0.604<br>[-3.250, 2.042]     | 0.283<br>[-1.011, 1.577]      | -0.489<br>[-1.841, 0.863]    | 3.793***<br>[2.817, 4.769]    | 0.286*<br>[-0.006, 0.578]     | 0.370<br>[-1.248, 1.989]      | 0.389<br>[-1.227, 2.006]      |
| HH_ETH (ref: Ekoi): Ibibio                       | -0.356<br>[-2.952, 2.240]     | -0.310<br>[-2.905, 2.285]     | 0.975<br>[-1.143, 3.094]      | -1.174<br>[-3.019, 0.671]     | 0.507<br>[-1.176, 2.190]     | 0.393<br>[-1.936, 2.722]      | 0.100<br>[-0.733, 0.933]      | 0.296<br>[-2.029, 2.622]      | 0.303<br>[-2.023, 2.629]      |
| HH_ETH (ref: Ekoi): Igala                        | -0.604<br>[-3.173, 1.964]     | -0.637<br>[-3.211, 1.936]     | -0.394<br>[-2.689, 1.901]     | -2.032<br>[-4.466, 0.402]     | 1.572*<br>[-0.222, 3.366]    | 3.192***<br>[1.463, 4.921]    | 0.983<br>[-0.706, 2.673]      | 0.282<br>[-1.560, 2.124]      | 0.279<br>[-1.562, 2.121]      |
| HH_ETH (ref: Ekoi): Igbo                         | -0.887<br>[-2.193, 0.419]     | -0.856<br>[-2.161, 0.449]     | -0.040<br>[-1.256, 1.177]     | -0.183<br>[-1.007, 0.640]     | 0.120<br>[-0.754, 0.994]     | 3.875***<br>[3.160, 4.590]    | 0.400***<br>[0.282, 0.518]    | 0.828<br>[-0.257, 1.914]      | 0.839<br>[-0.246, 1.924]      |
| HH_ETH (ref: Ekoi): Ijaw / Izon                  | 0.000<br>[0.000, 0.000]       | 0.000<br>[0.000, 0.000]       | 0.000<br>[0.000, 0.000]       | 0.000<br>[0.000, 0.000]       | 0.000<br>[0.000, 0.000]      | -0.404<br>[-1.516, 0.707]     | -1.627***<br>[-1.814, -1.440] | 0.000<br>[0.000, 0.000]       | 0.000<br>[0.000, 0.000]       |
| HH_ETH (ref: Ekoi): Kanuri / Beriberi            |                               |                               |                               |                               |                              |                               |                               |                               |                               |
| HH_ETH (ref: Ekoi): Tiv                          | 0.000<br>[0.000, 0.000]       | 0.000<br>[0.000, 0.000]       | 0.000<br>[0.000, 0.000]       | 0.000<br>[0.000, 0.000]       | 0.000<br>[0.000, 0.000]      | -3.047***<br>[-3.747, -2.348] | -1.582***<br>[-1.708, -1.456] | 0.000<br>[0.000, 0.000]       | 0.000<br>[0.000, 0.000]       |
| HH_ETH (ref: Ekoi): Yoruba                       | 0.000<br>[0.000, 0.000]       | 0.000<br>[0.000, 0.000]       | 0.220<br>[-2.478, 2.919]      | -1.742*<br>[-3.529, 0.045]    | 1.350<br>[-0.360, 3.060]     | 2.502**<br>[0.025, 4.978]     | 0.491<br>[-0.231, 1.212]      | 0.000<br>[0.000, 0.000]       | 0.000<br>[0.000, 0.000]       |
| HH_ETH (ref: Ekoi): Other                        | 0.000                         | 0.000                         | 0.000                         | 0.000                         | 0.000                        | 4.086***                      | 0.676***                      | 0.000                         | 0.000                         |

|                                         |                  |                  |                  |                  |                  |                  |                  |                 |                 |
|-----------------------------------------|------------------|------------------|------------------|------------------|------------------|------------------|------------------|-----------------|-----------------|
|                                         | [0.000, 0.000]   | [0.000, 0.000]   | [0.000, 0.000]   | [0.000, 0.000]   | [0.000, 0.000]   | [1.888, 6.284]   | [0.389, 0.964]   | [0.000, 0.000]  | [0.000, 0.000]  |
|                                         | -0.012           | -0.013           | 0.023            | -0.002           | -0.012           | -0.101***        | -0.006           | 0.206***        | 0.206***        |
| HH_SIZ                                  | [-0.052, 0.028]  | [-0.053, 0.027]  | [-0.017, 0.064]  | [-0.035, 0.030]  | [-0.045, 0.021]  | [-0.166, -0.037] | [-0.018, 0.007]  | [0.132, 0.280]  | [0.132, 0.280]  |
|                                         | 0.165***         | 0.164***         | -0.214***        | 0.152***         | -0.016           | 0.297***         | 0.046***         | 0.034           | 0.034           |
| HH_WEA                                  | [0.114, 0.217]   | [0.113, 0.215]   | [-0.268, -0.161] | [0.111, 0.192]   | [-0.055, 0.024]  | [0.201, 0.393]   | [0.029, 0.064]   | [-0.025, 0.093] | [-0.025, 0.093] |
|                                         | 0.876***         | 0.878***         | -0.072           | 0.063            | -0.165           | -0.647           | -0.070           | 0.265           | 0.227           |
| YEAR (ref: 2003): 2008                  | [0.211, 1.541]   | [0.214, 1.542]   | [-0.638, 0.494]  | [-0.404, 0.530]  | [-0.641, 0.312]  | [-1.778, 0.484]  | [-0.286, 0.147]  | [-0.444, 0.973] | [-0.477, 0.930] |
|                                         | 0.906***         | 0.914***         | -0.075           | -0.150           | 0.092            | 0.659            | 0.113            | 0.234           | 0.166           |
| YEAR (ref: 2003): 2013                  | [0.250, 1.563]   | [0.258, 1.571]   | [-0.629, 0.479]  | [-0.602, 0.302]  | [-0.367, 0.551]  | [-0.404, 1.722]  | [-0.119, 0.345]  | [-0.475, 0.943] | [-0.529, 0.861] |
|                                         | 1.159***         | 1.301***         | -0.147           | -0.237           | 0.217            | -0.653           | 0.027            | 0.468           | 0.462           |
| YEAR (ref: 2003): 2018                  | [0.408, 1.910]   | [0.534, 2.067]   | [-0.738, 0.444]  | [-0.718, 0.244]  | [-0.268, 0.702]  | [-1.764, 0.458]  | [-0.217, 0.270]  | [-0.359, 1.295] | [-0.365, 1.289] |
|                                         | -4.957***        | -4.578***        | 2.123***         | -1.095**         | -2.661***        | 2.038**          | 1.009***         | 1.657**         | 1.685**         |
| Constant                                | [-6.650, -3.263] | [-6.238, -2.917] | [0.628, 3.618]   | [-2.177, -0.013] | [-3.796, -1.526] | [0.300, 3.777]   | [0.663, 1.355]   | [0.114, 3.199]  | [0.144, 3.226]  |
|                                         | 0.169**          | 0.169**          | 0.750***         | 0.355***         | 0.238***         | 0.613***         | -1.893***        | 0.000           | 0.000           |
| Multilevel variance parameter: Level 1  | [0.034, 0.304]   | [0.033, 0.304]   | [0.346, 1.154]   | [0.183, 0.528]   | [0.105, 0.371]   | [0.435, 0.791]   | [-2.192, -1.594] | [-0.000, 0.000] | [-0.000, 0.000] |
|                                         |                  |                  |                  |                  |                  | 1.510***         | -0.008           |                 |                 |
| Multilevel variance parameter: Residual |                  |                  |                  |                  |                  | [1.439, 1.582]   | [-0.073, 0.056]  |                 |                 |
| Observations (Level 2)                  | 2036             | 2036             | 2900             | 2900             | 2900             | 2949             | 3229             | 4362            | 4362            |
| Observations (Level 1)                  | 85               | 85               | 86               | 86               | 123              | 86               | 87               | 87              | 87              |
| Akaike Information Criterion            | 2198.177         | 2202.549         | 2361.019         | 3572.969         | 3513.076         | 17468.034        | 9205.156         | 1926.233        | 1925.154        |
| Prob. > $\chi^2$                        | <0.001           | <0.001           | <0.001           | <0.001           | <0.001           | <0.001           | <0.001           | <0.001          | <0.001          |



| South South                                      | Non-polio full immunisation   |                               | Delivery                      |                               |                               | Antenatal care                |                               | Child survival                |                               |
|--------------------------------------------------|-------------------------------|-------------------------------|-------------------------------|-------------------------------|-------------------------------|-------------------------------|-------------------------------|-------------------------------|-------------------------------|
|                                                  | Full model                    | Interaction model (EXPxAGE)   | At home                       | At private facility           | At public facility            | No. of antenatal care visits  | No. of tetanus injections     | Exposure decomposition        | Total exposure                |
| EXP_CHI                                          | 0.065<br>[-0.042, 0.171]      | 0.171**<br>[0.001, 0.341]     |                               |                               |                               |                               |                               |                               |                               |
| EXPxAGE                                          |                               | -0.003***<br>[-0.006, -0.001] |                               |                               |                               |                               |                               |                               |                               |
| EXP_PREG                                         |                               |                               | -0.023<br>[-0.102, 0.056]     | 0.038<br>[-0.074, 0.150]      | 0.014<br>[-0.060, 0.088]      | 0.072<br>[-0.055, 0.198]      | 0.037*<br>[-0.000, 0.074]     |                               |                               |
| EXP_PREG_nod<br>(date approximation)             |                               |                               |                               |                               |                               |                               |                               | -0.056<br>[-0.206, 0.094]     |                               |
| EXP_CHI_nod<br>(date approximation)              |                               |                               |                               |                               |                               |                               |                               | -0.005<br>[-0.139, 0.128]     |                               |
| EXP_TOT_nod (total exposure, date approximation) |                               |                               |                               |                               |                               |                               |                               |                               | -0.026<br>[-0.142, 0.091]     |
| CHI_AGE                                          | 0.073***<br>[0.035, 0.110]    | 0.028**<br>[0.003, 0.053]     |                               |                               |                               |                               |                               | 0.023<br>[-0.015, 0.061]      | 0.021<br>[-0.016, 0.059]      |
| CHI_AGE2                                         | -0.001***<br>[-0.002, -0.000] |                               |                               |                               |                               |                               |                               | 0.000<br>[-0.001, 0.000]      | 0.000<br>[-0.001, 0.000]      |
| CHI_ORD                                          | -0.073**<br>[-0.135, -0.010]  | -0.074**<br>[-0.137, -0.011]  |                               |                               |                               |                               |                               | -0.239***<br>[-0.318, -0.160] | -0.239***<br>[-0.318, -0.160] |
| CHI_SEX                                          | 0.176*<br>[-0.016, 0.368]     | 0.173*<br>[-0.019, 0.365]     |                               |                               |                               |                               |                               | 0.317**<br>[0.054, 0.580]     | 0.317**<br>[0.054, 0.580]     |
| MOT_ANC                                          | 0.039***<br>[0.019, 0.060]    | 0.039***<br>[0.019, 0.060]    | -0.143***<br>[-0.162, -0.124] | 0.072***<br>[0.050, 0.093]    | 0.083***<br>[0.067, 0.100]    |                               |                               | 0.017<br>[-0.011, 0.046]      | 0.017<br>[-0.011, 0.046]      |
| MOT_EDM                                          | 0.050*<br>[-0.000, 0.101]     | 0.050*<br>[-0.001, 0.101]     | -0.023<br>[-0.069, 0.023]     | 0.028<br>[-0.038, 0.094]      | 0.015<br>[-0.028, 0.058]      | 0.075**<br>[0.005, 0.146]     | 0.031***<br>[0.010, 0.051]    | 0.033<br>[-0.032, 0.097]      | 0.033<br>[-0.032, 0.097]      |
| MOT_EDF                                          | 0.010<br>[-0.046, 0.066]      | 0.010<br>[-0.046, 0.065]      | -0.005<br>[-0.055, 0.044]     | 0.029<br>[-0.044, 0.101]      | -0.007<br>[-0.054, 0.040]     | 0.094*<br>[-0.000, 0.188]     | -0.011<br>[-0.032, 0.010]     | -0.036<br>[-0.113, 0.040]     | -0.036<br>[-0.113, 0.040]     |
| MOT_AWE                                          | 2.921***<br>[2.577, 3.265]    | 2.908***<br>[2.564, 3.251]    | -1.262***<br>[-1.510, -1.015] | 0.825***<br>[0.411, 1.239]    | 1.080***<br>[0.830, 1.330]    | 2.596***<br>[2.197, 2.995]    | 0.657***<br>[0.539, 0.775]    |                               |                               |
| MOT_AGE                                          | 0.026**<br>[0.005, 0.047]     | 0.026**<br>[0.005, 0.048]     | -0.030***<br>[-0.044, -0.016] | 0.007<br>[-0.013, 0.027]      | 0.023***<br>[0.010, 0.036]    | 0.019<br>[-0.006, 0.045]      | 0.001<br>[-0.005, 0.007]      | -0.003<br>[-0.031, 0.025]     | -0.003<br>[-0.031, 0.025]     |
| HH_RUR                                           | -0.040<br>[-0.280, 0.200]     | -0.047<br>[-0.288, 0.193]     | 0.715***<br>[0.476, 0.953]    | -0.564***<br>[-0.874, -0.253] | -0.322***<br>[-0.543, -0.100] | -1.067***<br>[-1.594, -0.539] | -0.065<br>[-0.192, 0.062]     | -0.405**<br>[-0.762, -0.048]  | -0.405**<br>[-0.762, -0.049]  |
| HH_REL (ref: Catholic): Other Christian          | -0.391**<br>[-0.741, -0.042]  | -0.396**<br>[-0.746, -0.046]  | 0.312**<br>[0.027, 0.598]     | 0.237<br>[-0.166, 0.641]      | -0.446***<br>[-0.710, -0.182] | -0.375<br>[-1.003, 0.253]     | -0.106*<br>[-0.226, 0.015]    | 0.054<br>[-0.403, 0.510]      | 0.054<br>[-0.402, 0.510]      |
| HH_REL (ref: Catholic): Islam                    | 0.009<br>[-0.761, 0.779]      | 0.006<br>[-0.765, 0.776]      | -0.084<br>[-0.771, 0.603]     | 0.063<br>[-0.702, 0.829]      | 0.157<br>[-0.457, 0.771]      | 0.019<br>[-1.728, 1.765]      | 0.169<br>[-0.139, 0.477]      | 0.786<br>[-0.598, 2.169]      | 0.787<br>[-0.597, 2.171]      |
| HH_REL (ref: Catholic): Traditionalist           | -0.746<br>[-1.750, 0.258]     | -0.727<br>[-1.732, 0.277]     | 0.634<br>[-0.311, 1.579]      | -0.113<br>[-1.255, 1.030]     | -0.469<br>[-1.335, 0.397]     | 0.748<br>[-0.852, 2.347]      | -0.339<br>[-0.789, 0.112]     | -0.562<br>[-1.539, 0.415]     | -0.557<br>[-1.534, 0.420]     |
| HH_REL (ref: Catholic): Other                    | -0.300<br>[-1.524, 0.924]     | -0.294<br>[-1.520, 0.932]     | -0.562<br>[-1.606, 0.482]     | 0.000<br>[0.000, 0.000]       | 0.518<br>[-0.484, 1.519]      | -0.793<br>[-2.518, 0.933]     | -0.237<br>[-1.005, 0.532]     | 0.000<br>[0.000, 0.000]       | 0.000<br>[0.000, 0.000]       |
| HH_ETH (ref: Ekoi): Fulani                       | -1.438<br>[-3.691, 0.815]     | -1.440<br>[-3.692, 0.813]     | 0.033<br>[-1.779, 1.845]      | 0.177<br>[-2.288, 2.643]      | 0.135<br>[-1.520, 1.790]      | 1.450<br>[-2.747, 5.646]      | -0.187<br>[-0.686, 0.312]     | -1.042<br>[-3.402, 1.317]     | -1.025<br>[-3.384, 1.334]     |
| HH_ETH (ref: Ekoi): Hausa                        | -0.923***<br>[-1.445, -0.401] | -0.920***<br>[-1.444, -0.397] | 0.244<br>[-0.267, 0.754]      | 0.183<br>[-0.805, 1.171]      | -0.129<br>[-0.625, 0.367]     | 0.598<br>[-0.506, 1.701]      | -0.003<br>[-0.274, 0.267]     | -0.496<br>[-1.258, 0.265]     | -0.494<br>[-1.255, 0.267]     |
| HH_ETH (ref: Ekoi): Ibibio                       | -0.758<br>[-3.413, 1.898]     | -0.740<br>[-3.351, 1.871]     | 0.050<br>[-1.849, 1.949]      | 1.096<br>[-1.306, 3.499]      | -0.256<br>[-1.947, 1.436]     | 0.828<br>[-1.132, 2.787]      | -0.337<br>[-1.153, 0.479]     | -0.964<br>[-3.153, 1.225]     | -0.963<br>[-3.151, 1.224]     |
| HH_ETH (ref: Ekoi): Igala                        | -0.492*<br>[-1.051, 0.067]    | -0.488*<br>[-1.049, 0.073]    | -0.025<br>[-0.539, 0.488]     | 1.214***<br>[0.297, 2.130]    | -0.488**<br>[-0.975, -0.000]  | 1.838***<br>[0.562, 3.114]    | 0.088<br>[-0.165, 0.342]      | -0.304<br>[-1.113, 0.506]     | -0.300<br>[-1.109, 0.509]     |
| HH_ETH (ref: Ekoi): Ijaw / Izon                  | -0.640**<br>[-1.138, -0.143]  | -0.639**<br>[-1.140, -0.139]  | 0.804***<br>[0.290, 1.317]    | -0.043<br>[-1.023, 0.938]     | -0.679***<br>[-1.178, -0.180] | 0.095<br>[-1.029, 1.219]      | -0.018<br>[-0.265, 0.229]     | -0.213<br>[-0.951, 0.526]     | -0.212<br>[-0.950, 0.526]     |
| HH_ETH (ref: Ekoi): Kanuri / Beriberi            | 0.000<br>[0.000, 0.000]       | 0.000<br>[0.000, 0.000]       | 0.000<br>[0.000, 0.000]       | 0.000<br>[0.000, 0.000]       | 0.000<br>[0.000, 0.000]       |                               |                               | 0.000<br>[0.000, 0.000]       | 0.000<br>[0.000, 0.000]       |
| HH_ETH (ref: Ekoi): Tiv                          | 0.000<br>[0.000, 0.000]       | 0.000<br>[0.000, 0.000]       | 0.000<br>[0.000, 0.000]       | 0.000<br>[0.000, 0.000]       | 0.000<br>[0.000, 0.000]       | 1.582**<br>[0.257, 2.906]     | -1.433***<br>[-1.688, -1.177] | 0.000<br>[0.000, 0.000]       | 0.000<br>[0.000, 0.000]       |
| HH_ETH (ref: Ekoi): Yoruba                       | -2.193***<br>[-3.155, -1.231] | -2.185***<br>[-3.148, -1.222] | -0.089<br>[-0.970, 0.791]     | 2.236***<br>[1.101, 3.371]    | -1.470***<br>[-2.336, -0.604] | 1.253<br>[-0.524, 3.030]      | 0.005<br>[-0.370, 0.380]      | 0.131<br>[-1.496, 1.757]      | 0.137<br>[-1.491, 1.765]      |
|                                                  | -0.887***                     | -0.885***                     | 0.126                         | 0.953**                       | -0.384*                       | 1.037*                        | 0.063                         | -0.202                        | -0.201                        |

|                                            |                  |                  |                  |                  |                  |                            |                            |                 |                 |
|--------------------------------------------|------------------|------------------|------------------|------------------|------------------|----------------------------|----------------------------|-----------------|-----------------|
| HH_ETH (ref: Ekoi): Other                  | [-1.352, -0.423] | [-1.352, -0.419] | [-0.319, 0.571]  | [0.066, 1.840]   | [-0.814, 0.046]  | [-0.022, 2.095]            | [-0.169, 0.294]            | [-0.905, 0.500] | [-0.903, 0.501] |
|                                            | -0.016           | -0.017           | 0.058***         | -0.043           | -0.030*          | -0.002                     | -0.016*                    | 0.314***        | 0.315***        |
| HH_SIZ                                     | [-0.060, 0.027]  | [-0.060, 0.027]  | [0.020, 0.095]   | [-0.095, 0.010]  | [-0.065, 0.005]  | [-0.067, 0.064]            | [-0.033, 0.002]            | [0.236, 0.393]  | [0.236, 0.394]  |
|                                            | 0.120***         | 0.119***         | -0.180***        | 0.139***         | 0.103***         | 0.409***                   | 0.066***                   | -0.041          | -0.041          |
| HH_WEA                                     | [0.074, 0.167]   | [0.072, 0.166]   | [-0.223, -0.137] | [0.079, 0.199]   | [0.063, 0.144]   | [0.316, 0.502]             | [0.043, 0.088]             | [-0.105, 0.022] | [-0.104, 0.023] |
|                                            | 0.898**          | 0.906**          | 0.499*           | -0.197           | -0.311           | -0.350                     | -0.306***                  | 1.135***        | 1.150***        |
| YEAR (ref: 2003): 2008                     | [0.146, 1.650]   | [0.153, 1.658]   | [-0.031, 1.029]  | [-0.819, 0.425]  | [-0.800, 0.179]  | [-1.507, 0.807]            | [-0.519, -0.093]           | [0.505, 1.765]  | [0.522, 1.779]  |
|                                            | 1.469***         | 1.461***         | 0.489*           | -0.851***        | -0.036           | -1.238**                   | -0.284**                   | 1.092***        | 1.138***        |
| YEAR (ref: 2003): 2013                     | [0.726, 2.212]   | [0.716, 2.207]   | [-0.034, 1.013]  | [-1.468, -0.234] | [-0.517, 0.446]  | [-2.391, -0.084]           | [-0.503, -0.064]           | [0.480, 1.704]  | [0.543, 1.733]  |
|                                            | 1.745***         | 1.874***         | 0.674**          | -0.759**         | -0.153           | -1.744***                  | -0.372***                  | 1.288***        | 1.287***        |
| YEAR (ref: 2003): 2018                     | [0.917, 2.572]   | [1.022, 2.726]   | [0.117, 1.231]   | [-1.427, -0.091] | [-0.669, 0.363]  | [-2.894, -0.594]           | [-0.601, -0.144]           | [0.519, 2.058]  | [0.518, 2.056]  |
|                                            | -5.197***        | -4.898***        | 2.076***         | -4.455***        | -2.101***        | 2.123**                    | 1.270***                   | 1.540**         | 1.500**         |
| Constant                                   | [-6.400, -3.994] | [-6.061, -3.736] | [1.189, 2.964]   | [-5.818, -3.092] | [-2.943, -1.259] | [0.111, 4.135]             | [0.854, 1.686]             | [0.273, 2.808]  | [0.238, 2.761]  |
|                                            | 0.024            | 0.027            | 0.389***         | 0.640***         | 0.365***         | 0.216**                    | -1.507***                  | 0.057           | 0.057           |
| Multilevel variance parameter: Level 1     | [-0.040, 0.087]  | [-0.038, 0.092]  | [0.190, 0.587]   | [0.282, 0.997]   | [0.193, 0.538]   | [0.007, 0.426]             | [-1.738, -1.276]           | [-0.072, 0.187] | [-0.072, 0.186] |
| Multilevel variance parameter:<br>Residual |                  |                  |                  |                  |                  | 1.554***<br>[1.495, 1.614] | 0.190***<br>[0.136, 0.244] |                 |                 |
| Observations (Level 2)                     | 2514             | 2514             | 3552             | 3528             | 3552             | 3620                       | 3975                       | 4979            | 4979            |
| Observations (Level 1)                     | 111              | 111              | 112              | 112              | 112              | 112                        | 112                        | 113             | 113             |
| Akaike Information Criterion               | 2613.206         | 2616.454         | 3449.379         | 2094.164         | 3846.725         | 21688.628                  | 12916.658                  | 1912.315        | 1910.708        |
| Prob. > $\chi^2$                           | <0.001           | <0.001           | <0.001           | <0.001           | <0.001           | <0.001                     | <0.001                     | <0.001          | <0.001          |

| South West                                       | Non-polio full immunisation              |                                          | Delivery                                  |                                           |                                           | Antenatal care                         |                                        | Child survival                            |                                           |
|--------------------------------------------------|------------------------------------------|------------------------------------------|-------------------------------------------|-------------------------------------------|-------------------------------------------|----------------------------------------|----------------------------------------|-------------------------------------------|-------------------------------------------|
|                                                  | Full model                               | Interaction model (EXPxAGE)              | At home                                   | At private facility                       | At public facility                        | No. of antenatal care visits           | No. of tetanus injections              | Exposure decomposition                    | Total exposure                            |
| EXP_CHI                                          | -0.060<br>[-0.144, 0.024]                | -0.019<br>[-0.138, 0.101]                |                                           |                                           |                                           |                                        |                                        |                                           |                                           |
| EXPxAGE                                          |                                          | -0.002 <sup>*</sup><br>[-0.004, 0.000]   |                                           |                                           |                                           |                                        |                                        |                                           |                                           |
| EXP_PREG                                         |                                          |                                          | 0.055<br>[-0.013, 0.122]                  | -0.003<br>[-0.059, 0.052]                 | -0.033<br>[-0.087, 0.022]                 | -0.069<br>[-0.206, 0.069]              | 0.034 <sup>***</sup><br>[0.009, 0.058] |                                           |                                           |
| EXP_PREG_nod<br>(date approximation)             |                                          |                                          |                                           |                                           |                                           |                                        |                                        | -0.021<br>[-0.145, 0.102]                 |                                           |
| EXP_CHI_nod<br>(date approximation)              |                                          |                                          |                                           |                                           |                                           |                                        |                                        | 0.018<br>[-0.103, 0.139]                  |                                           |
| EXP_TOT_nod (total exposure, date approximation) |                                          |                                          |                                           |                                           |                                           |                                        |                                        |                                           | -0.001<br>[-0.103, 0.101]                 |
| CHI_AGE                                          | 0.083 <sup>***</sup><br>[0.050, 0.117]   | 0.056 <sup>***</sup><br>[0.035, 0.077]   |                                           |                                           |                                           |                                        |                                        | 0.035 <sup>*</sup><br>[-0.001, 0.071]     | 0.035 <sup>*</sup><br>[-0.001, 0.071]     |
| CHI_AGE2                                         | -0.001 <sup>**</sup><br>[-0.001, -0.000] |                                          |                                           |                                           |                                           |                                        |                                        | 0.000<br>[-0.001, 0.000]                  | 0.000<br>[-0.001, 0.000]                  |
| CHI_ORD                                          | -0.087 <sup>**</sup><br>[-0.156, -0.017] | -0.087 <sup>**</sup><br>[-0.157, -0.018] |                                           |                                           |                                           |                                        |                                        | -0.369 <sup>***</sup><br>[-0.468, -0.271] | -0.367 <sup>***</sup><br>[-0.466, -0.269] |
| CHI_SEX                                          | -0.006<br>[-0.182, 0.171]                | -0.002<br>[-0.179, 0.174]                |                                           |                                           |                                           |                                        |                                        | 0.213<br>[-0.061, 0.486]                  | 0.212<br>[-0.061, 0.486]                  |
| MOT_ANC                                          | 0.039 <sup>***</sup><br>[0.024, 0.054]   | 0.039 <sup>***</sup><br>[0.024, 0.054]   | -0.064 <sup>***</sup><br>[-0.078, -0.049] | 0.034 <sup>***</sup><br>[0.023, 0.045]    | 0.011 <sup>*</sup><br>[-0.000, 0.022]     |                                        |                                        | -0.023 <sup>**</sup><br>[-0.045, -0.001]  | -0.022 <sup>**</sup><br>[-0.044, -0.000]  |
| MOT_EDM                                          | 0.042 <sup>*</sup><br>[-0.004, 0.088]    | 0.042 <sup>*</sup><br>[-0.004, 0.088]    | -0.040 <sup>*</sup><br>[-0.082, 0.003]    | 0.054 <sup>***</sup><br>[0.016, 0.091]    | -0.013<br>[-0.049, 0.023]                 | 0.068<br>[-0.024, 0.160]               | 0.002<br>[-0.015, 0.019]               | 0.012<br>[-0.058, 0.082]                  | 0.012<br>[-0.058, 0.082]                  |
| MOT_EDF                                          | -0.031<br>[-0.080, 0.018]                | -0.031<br>[-0.080, 0.018]                | -0.015<br>[-0.059, 0.029]                 | -0.001<br>[-0.041, 0.038]                 | 0.018<br>[-0.019, 0.055]                  | 0.034<br>[-0.077, 0.146]               | 0.008<br>[-0.012, 0.028]               | 0.003<br>[-0.070, 0.075]                  | 0.002<br>[-0.070, 0.074]                  |
| MOT_AWE                                          | 2.962 <sup>***</sup><br>[2.589, 3.336]   | 2.953 <sup>***</sup><br>[2.580, 3.327]   | -1.082 <sup>***</sup><br>[-1.294, -0.870] | 0.072<br>[-0.142, 0.286]                  | 0.973 <sup>***</sup><br>[0.756, 1.190]    | 2.383 <sup>***</sup><br>[1.878, 2.889] | 0.582 <sup>***</sup><br>[0.488, 0.675] |                                           |                                           |
| MOT_AGE                                          | 0.031 <sup>***</sup><br>[0.011, 0.051]   | 0.031 <sup>***</sup><br>[0.011, 0.051]   | -0.006<br>[-0.020, 0.008]                 | -0.005<br>[-0.018, 0.007]                 | 0.011 <sup>*</sup><br>[-0.001, 0.023]     | 0.012<br>[-0.016, 0.041]               | 0.002<br>[-0.003, 0.006]               | -0.012<br>[-0.041, 0.018]                 | -0.012<br>[-0.042, 0.017]                 |
| HH_RUR                                           | -0.242 <sup>*</sup><br>[-0.489, 0.006]   | -0.243 <sup>*</sup><br>[-0.490, 0.005]   | 0.028<br>[-0.217, 0.273]                  | -0.455 <sup>***</sup><br>[-0.668, -0.242] | 0.333 <sup>***</sup><br>[0.129, 0.537]    | 0.423<br>[-0.286, 1.133]               | -0.006<br>[-0.098, 0.086]              | 0.038<br>[-0.304, 0.380]                  | 0.044<br>[-0.297, 0.385]                  |
| HH_REL (ref: Catholic): Other Christian          | -0.095<br>[-0.593, 0.403]                | -0.098<br>[-0.596, 0.400]                | -0.232<br>[-0.672, 0.207]                 | 0.171<br>[-0.186, 0.529]                  | -0.032<br>[-0.385, 0.321]                 | 0.380<br>[-0.733, 1.493]               | 0.053<br>[-0.078, 0.185]               | -0.180<br>[-0.859, 0.500]                 | -0.180<br>[-0.859, 0.499]                 |
| HH_REL (ref: Catholic): Islam                    | -0.402<br>[-0.919, 0.115]                | -0.402<br>[-0.918, 0.114]                | -0.261<br>[-0.718, 0.195]                 | 0.213<br>[-0.164, 0.589]                  | -0.042<br>[-0.412, 0.328]                 | 0.431<br>[-0.780, 1.642]               | 0.098<br>[-0.040, 0.235]               | 0.080<br>[-0.642, 0.803]                  | 0.082<br>[-0.640, 0.804]                  |
| HH_REL (ref: Catholic): Traditionalist           | -0.218<br>[-1.501, 1.066]                | -0.228<br>[-1.508, 1.051]                | 0.404<br>[-0.674, 1.481]                  | -0.846<br>[-2.038, 0.345]                 | 0.350<br>[-0.641, 1.341]                  | 1.704<br>[-3.022, 6.429]               | -0.393 <sup>*</sup><br>[-0.803, 0.017] | 0.124<br>[-2.049, 2.298]                  | 0.112<br>[-2.061, 2.285]                  |
| HH_REL (ref: Catholic): Other                    | 0.994<br>[-3.233, 5.221]                 | 0.992<br>[-3.182, 5.167]                 | 0.337<br>[-2.751, 3.425]                  | 0.000<br>[0.000, 0.000]                   | 1.628<br>[-1.684, 4.939]                  | 0.461<br>[-12.702, 13.625]             | 1.825<br>[-2.055, 5.705]               | 0.000<br>[0.000, 0.000]                   | 0.000<br>[0.000, 0.000]                   |
| HH_ETH (ref: Ekoi): Fulani                       | -0.720<br>[-1.789, 0.349]                | -0.713<br>[-1.784, 0.359]                | 1.513 <sup>***</sup><br>[0.758, 2.268]    | -0.523<br>[-1.340, 0.294]                 | -2.137 <sup>***</sup><br>[-3.144, -1.131] | 0.000<br>[0.000, 0.000]                | 0.000<br>[0.000, 0.000]                | 0.993<br>[-1.064, 3.050]                  | 1.003<br>[-1.053, 3.060]                  |
| HH_ETH (ref: Ekoi): Hausa                        | -0.224<br>[-1.123, 0.675]                | -0.227<br>[-1.125, 0.671]                | 0.613 <sup>*</sup><br>[-0.096, 1.322]     | -0.986 <sup>***</sup><br>[-1.735, -0.237] | 0.418<br>[-0.268, 1.105]                  | 2.791 <sup>**</sup><br>[0.122, 5.461]  | 0.594 <sup>**</sup><br>[0.121, 1.067]  | 0.383<br>[-0.869, 1.634]                  | 0.381<br>[-0.869, 1.631]                  |
| HH_ETH (ref: Ekoi): Ibibio                       | 1.109<br>[-0.248, 2.466]                 | 1.115<br>[-0.237, 2.468]                 | -0.264<br>[-1.248, 0.720]                 | 0.026<br>[-0.791, 0.844]                  | 0.257<br>[-0.618, 1.132]                  | 3.338 <sup>**</sup><br>[0.715, 5.961]  | 0.499 <sup>**</sup><br>[0.045, 0.952]  | -0.060<br>[-1.552, 1.433]                 | -0.068<br>[-1.560, 1.423]                 |
| HH_ETH (ref: Ekoi): Igala                        | 0.685<br>[-0.655, 2.024]                 | 0.694<br>[-0.645, 2.032]                 | -0.676<br>[-1.738, 0.385]                 | 0.647<br>[-0.253, 1.547]                  | -0.081<br>[-1.019, 0.857]                 | 3.470 <sup>***</sup><br>[1.030, 5.910] | 0.776 <sup>***</sup><br>[0.247, 1.305] | 0.000<br>[0.000, 0.000]                   | 0.000<br>[0.000, 0.000]                   |
| HH_ETH (ref: Ekoi): Igbo                         | 0.521 <sup>**</sup><br>[0.014, 1.028]    | 0.531 <sup>**</sup><br>[0.025, 1.038]    | -1.501 <sup>***</sup><br>[-2.066, -0.936] | 0.786 <sup>***</sup><br>[0.422, 1.150]    | 0.009<br>[-0.366, 0.384]                  | 4.918 <sup>***</sup><br>[2.881, 6.955] | 0.908 <sup>***</sup><br>[0.502, 1.315] | -0.024<br>[-0.650, 0.603]                 | -0.020<br>[-0.647, 0.606]                 |
| HH_ETH (ref: Ekoi): Ijaw / Izon                  | -0.625<br>[-2.141, 0.891]                | -0.638<br>[-2.160, 0.884]                | 0.804<br>[-0.205, 1.812]                  | -0.273<br>[-1.215, 0.668]                 | -1.925 <sup>**</sup><br>[-3.431, -0.419]  | 2.087 <sup>*</sup><br>[-0.170, 4.344]  | 0.107<br>[-0.322, 0.536]               | 0.497<br>[-0.809, 1.804]                  | 0.505<br>[-0.801, 1.811]                  |
| HH_ETH (ref: Ekoi): Kanuri / Beriberi            | 2.769 <sup>*</sup><br>[-0.166, 5.704]    | 2.780 <sup>*</sup><br>[-0.149, 5.710]    | 1.245<br>[-1.500, 3.990]                  | 0.000<br>[0.000, 0.000]                   | 1.406<br>[-1.171, 3.984]                  | 2.783<br>[-2.223, 7.790]               | 0.080<br>[-1.800, 1.960]               | 0.000<br>[0.000, 0.000]                   | 0.000<br>[0.000, 0.000]                   |
| HH_ETH (ref: Ekoi): Tiv                          | 1.769 <sup>*</sup><br>[-0.032, 3.569]    | 1.775 <sup>*</sup><br>[-0.025, 3.574]    | -0.566<br>[-1.650, 0.518]                 | -0.238<br>[-1.545, 1.068]                 | 0.530<br>[-0.532, 1.592]                  | 1.717<br>[-1.581, 5.014]               | 0.661 <sup>*</sup><br>[-0.123, 1.445]  | -0.015<br>[-2.100, 2.070]                 | -0.011<br>[-2.096, 2.074]                 |
| HH_ETH (ref: Ekoi): Yoruba                       | 0.289 <sup>*</sup><br>[-0.008, 0.587]    | 0.294 <sup>*</sup><br>[-0.004, 0.591]    | -0.244 <sup>*</sup><br>[-0.505, 0.016]    | -0.118<br>[-0.361, 0.126]                 | 0.341 <sup>***</sup><br>[0.102, 0.580]    | 5.612 <sup>***</sup><br>[3.766, 7.457] | 0.944 <sup>***</sup><br>[0.562, 1.325] | 0.438 <sup>**</sup><br>[0.030, 0.846]     | 0.440 <sup>**</sup><br>[0.032, 0.848]     |

|                                            |                               |                               |                               |                               |                               |                               |                               |                            |                            |
|--------------------------------------------|-------------------------------|-------------------------------|-------------------------------|-------------------------------|-------------------------------|-------------------------------|-------------------------------|----------------------------|----------------------------|
| HH_ETH (ref: Ekoi): Other                  | 0.000<br>[0.000, 0.000]       | 0.000<br>[0.000, 0.000]       | 0.000<br>[0.000, 0.000]       | 0.000<br>[0.000, 0.000]       | 0.000<br>[0.000, 0.000]       | 4.747***<br>[2.737, 6.757]    | 0.845***<br>[0.439, 1.250]    | 0.000<br>[0.000, 0.000]    | 0.000<br>[0.000, 0.000]    |
| HH_SIZ                                     | -0.011<br>[-0.058, 0.036]     | -0.011<br>[-0.059, 0.036]     | 0.031<br>[-0.010, 0.071]      | -0.020<br>[-0.056, 0.016]     | -0.008<br>[-0.042, 0.026]     | -0.136***<br>[-0.238, -0.035] | 0.002<br>[-0.014, 0.018]      | 0.499***<br>[0.399, 0.599] | 0.498***<br>[0.398, 0.598] |
| HH_WEA                                     | 0.142***<br>[0.090, 0.195]    | 0.142***<br>[0.089, 0.195]    | -0.154***<br>[-0.203, -0.105] | 0.066***<br>[0.024, 0.108]    | 0.059***<br>[0.019, 0.099]    | 0.298***<br>[0.193, 0.403]    | 0.040***<br>[0.022, 0.058]    | -0.012<br>[-0.088, 0.064]  | -0.011<br>[-0.087, 0.064]  |
| YEAR (ref: 2003): 2008                     | -0.257<br>[-0.891, 0.378]     | -0.252<br>[-0.889, 0.385]     | -0.027<br>[-0.516, 0.461]     | -0.356*<br>[-0.754, 0.041]    | 0.338<br>[-0.086, 0.763]      | -1.254**<br>[-2.220, -0.288]  | -0.181**<br>[-0.337, -0.024]  | -0.084<br>[-0.845, 0.677]  | -0.065<br>[-0.823, 0.694]  |
| YEAR (ref: 2003): 2013                     | -0.749**<br>[-1.390, -0.108]  | -0.726**<br>[-1.368, -0.084]  | 0.236<br>[-0.256, 0.728]      | -0.495**<br>[-0.891, -0.100]  | 0.258<br>[-0.165, 0.681]      | -0.078<br>[-1.055, 0.898]     | -0.261***<br>[-0.415, -0.107] | 0.140<br>[-0.628, 0.908]   | 0.174<br>[-0.584, 0.933]   |
| YEAR (ref: 2003): 2018                     | -0.694**<br>[-1.384, -0.003]  | -0.656*<br>[-1.349, 0.037]    | -0.072<br>[-0.595, 0.452]     | -0.716***<br>[-1.140, -0.292] | 0.709***<br>[0.265, 1.153]    | -3.705***<br>[-4.735, -2.674] | -0.425***<br>[-0.602, -0.247] | 0.159<br>[-0.675, 0.993]   | 0.149<br>[-0.684, 0.982]   |
| Constant                                   | -4.520***<br>[-5.602, -3.439] | -4.319***<br>[-5.373, -3.265] | 1.438***<br>[0.624, 2.252]    | -1.088***<br>[-1.786, -0.390] | -2.422***<br>[-3.131, -1.714] | 3.280***<br>[0.838, 5.722]    | 0.345<br>[-0.119, 0.808]      | 1.871***<br>[0.540, 3.202] | 1.849***<br>[0.520, 3.178] |
| Multilevel variance parameter: Level 1     | 0.255***<br>[0.097, 0.414]    | 0.257***<br>[0.098, 0.416]    | 0.479***<br>[0.264, 0.694]    | 0.357***<br>[0.207, 0.506]    | 0.543***<br>[0.342, 0.744]    | 0.483***<br>[0.285, 0.681]    | -1.886***<br>[-2.158, -1.614] | 0.027<br>[-0.106, 0.161]   | 0.026<br>[-0.107, 0.158]   |
| Multilevel variance parameter:<br>Residual |                               |                               |                               |                               |                               | 1.786***<br>[1.756, 1.816]    | 0.023<br>[-0.039, 0.086]      |                            |                            |
| Level 1 Observations (child)               | 3196                          | 3196                          | 4373                          | 4368                          | 4373                          | 4513                          | 4946                          | 6002                       | 6002                       |
| Level 2 Observations (LGA)                 | 121                           | 121                           | 121                           | 121                           | 121                           | 121                           | 121                           | 121                        | 121                        |
| Akaike Information Criterion               | 3244.008                      | 3246.792                      | 3803.166                      | 5074.963                      | 5338.697                      | 29126.36                      | 14392.094                     | 1819.029                   | 1817.343                   |
| Prob. > $\chi^2$                           | <0.001                        | <0.001                        | <0.001                        | <0.001                        | <0.001                        | <0.001                        | <0.001                        | <0.001                     | <0.001                     |

95% confidence intervals in brackets

\* p &lt; 0.10, \*\* p &lt; 0.05, \*\*\* p &lt; 0.01

**Table 8: Intraclass correlation on LGA level in aggregate two-level models.**

| <b>Model</b>                                         | <b>Intraclass correlation</b> |
|------------------------------------------------------|-------------------------------|
| Routine childhood immunisation                       | 8.0%                          |
| Routine childhood immunisation (EXPxAGE interaction) | 8.0%                          |
| Place of delivery: home                              | 12.0%                         |
| Place of delivery: private facility                  | 18.1%                         |
| Place of delivery: public facility                   | 12.3%                         |
| No. of antenatal care visits                         | 21.8%                         |
| No. of tetanus toxoid injections                     | 4.6%                          |
| Child survival (exposure decomposition)              | 1.2%                          |
| Child survival (total exposure)                      | 1.2%                          |
| Routine childhood immunisation                       | 8.0%                          |

*Notes.* Intraclass correlations for main results reported in Section 4.2, based on two-level logistic regression with LGA random effect. LGA = local government area.

Table 3a: Detailed results: Link between SIA exposure and routine childhood immunisation uptake

| Dependent variable: non-polio full immunisation status | Main results          |                             |                        |                         | Robustness checks: reporting |                                                |                                  |                                                |                                  |
|--------------------------------------------------------|-----------------------|-----------------------------|------------------------|-------------------------|------------------------------|------------------------------------------------|----------------------------------|------------------------------------------------|----------------------------------|
|                                                        | Full model            | Interaction model (EXPxAGE) | Exposure decomposition | Year-Interaction models |                              | Full model                                     |                                  | Interaction model (EXPxAGE)                    |                                  |
|                                                        |                       |                             |                        | (EXPxYR)                | (EXPxAGExYR)                 | Only health card reported vaccines (VAC_norep) | Date approximation (EXP_CHI_nod) | Only health card reported vaccines (VAC_norep) | Date approximation (EXP_CHI_nod) |
| EXP_CHI                                                | -0.024 <sup>***</sup> | 0.012                       |                        | -0.053                  | -0.551                       | -0.002                                         | -0.025 <sup>***</sup>            | 0.036 <sup>*</sup>                             | 0.004                            |
|                                                        | [-0.036, -0.012]      | [-0.009, 0.034]             |                        | [-0.217, 0.112]         | [-1.460, 0.359]              | [-0.021, 0.018]                                | [-0.036, -0.015]                 | [0.002, 0.070]                                 | [-0.014, 0.022]                  |
| EXP_CHI_RI                                             |                       |                             | -0.024 <sup>†</sup>    |                         |                              |                                                |                                  |                                                |                                  |
|                                                        |                       |                             | [-0.048, 0.000]        |                         |                              |                                                |                                  |                                                |                                  |
| EXP_CHI_FU                                             |                       |                             | -0.024 <sup>***</sup>  |                         |                              |                                                |                                  |                                                |                                  |
|                                                        |                       |                             | [-0.037, -0.010]       |                         |                              |                                                |                                  |                                                |                                  |
| EXPxAGE                                                |                       | -0.001 <sup>***</sup>       |                        |                         | 0.020                        |                                                |                                  | -0.001 <sup>***</sup>                          | -0.001 <sup>***</sup>            |
|                                                        |                       | [-0.001, -0.001]            |                        |                         | [-0.032, 0.072]              |                                                |                                  | [-0.002, -0.000]                               | [-0.001, -0.000]                 |
| EXPxYR                                                 |                       |                             |                        | 0.010                   | 0.531                        |                                                |                                  |                                                |                                  |
| [yr = 2008]                                            |                       |                             |                        | [-0.154, 0.174]         | [-0.379, 1.440]              |                                                |                                  |                                                |                                  |
| EXPxYR                                                 |                       |                             |                        | 0.027                   | 0.570                        |                                                |                                  |                                                |                                  |
| [yr = 2013]                                            |                       |                             |                        | [-0.137, 0.190]         | [-0.339, 1.479]              |                                                |                                  |                                                |                                  |
| EXPxYR                                                 |                       |                             |                        | 0.041                   | 0.711                        |                                                |                                  |                                                |                                  |
| [yr = 2018]                                            |                       |                             |                        | [-0.124, 0.205]         | [-0.203, 1.626]              |                                                |                                  |                                                |                                  |
| AGEXYR                                                 |                       |                             |                        |                         | -0.062                       |                                                |                                  |                                                |                                  |
| [yr = 2008]                                            |                       |                             |                        |                         | [-0.251, 0.126]              |                                                |                                  |                                                |                                  |
| AGEXYR                                                 |                       |                             |                        |                         | -0.058                       |                                                |                                  |                                                |                                  |
| [yr = 2013]                                            |                       |                             |                        |                         | [-0.246, 0.130]              |                                                |                                  |                                                |                                  |
| AGEXYR                                                 |                       |                             |                        |                         | -0.060                       |                                                |                                  |                                                |                                  |
| [yr = 2018]                                            |                       |                             |                        |                         | [-0.249, 0.129]              |                                                |                                  |                                                |                                  |
| EXPxAGEXYR                                             |                       |                             |                        |                         | -0.020                       |                                                |                                  |                                                |                                  |
| [yr = 2008]                                            |                       |                             |                        |                         | [-0.072, 0.032]              |                                                |                                  |                                                |                                  |
| EXPxAGEXYR                                             |                       |                             |                        |                         | -0.021                       |                                                |                                  |                                                |                                  |
| [yr = 2013]                                            |                       |                             |                        |                         | [-0.073, 0.031]              |                                                |                                  |                                                |                                  |
| EXPxAGEXYR                                             |                       |                             |                        |                         | -0.026                       |                                                |                                  |                                                |                                  |
| [yr = 2018]                                            |                       |                             |                        |                         | [-0.078, 0.026]              |                                                |                                  |                                                |                                  |
| CHI_AGE                                                | 0.078 <sup>***</sup>  | 0.038 <sup>***</sup>        | 0.078 <sup>***</sup>   | 0.033 <sup>***</sup>    | 0.098                        | 0.069 <sup>***</sup>                           | 0.070 <sup>***</sup>             | 0.033 <sup>***</sup>                           | 0.036 <sup>***</sup>             |
|                                                        | [0.063, 0.093]        | [0.031, 0.044]              | [0.063, 0.093]         | [0.027, 0.039]          | [-0.090, 0.286]              | [0.046, 0.091]                                 | [0.057, 0.083]                   | [0.023, 0.043]                                 | [0.030, 0.042]                   |
| CHI_AGE2                                               | -0.001 <sup>***</sup> |                             | -0.001 <sup>***</sup>  |                         |                              | -0.001 <sup>***</sup>                          | -0.001 <sup>***</sup>            |                                                |                                  |
|                                                        | [-0.001, -0.001]      |                             | [-0.001, -0.001]       |                         |                              | [-0.001, -0.000]                               | [-0.001, -0.000]                 |                                                |                                  |
| CHI_ORD                                                | -0.060 <sup>***</sup> | -0.061 <sup>***</sup>       | -0.061 <sup>***</sup>  | -0.061 <sup>***</sup>   | -0.062 <sup>***</sup>        | -0.083 <sup>***</sup>                          | -0.076 <sup>***</sup>            | -0.083 <sup>***</sup>                          | -0.077 <sup>***</sup>            |
|                                                        | [-0.085, -0.036]      | [-0.086, -0.037]            | [-0.085, -0.036]       | [-0.085, -0.036]        | [-0.086, -0.037]             | [-0.121, -0.046]                               | [-0.098, -0.055]                 | [-0.121, -0.046]                               | [-0.099, -0.055]                 |
| CHI_SEX                                                | -0.003                | -0.004                      | -0.003                 | -0.007                  | -0.006                       | -0.036                                         | 0.014                            | -0.037                                         | 0.013                            |
|                                                        | [-0.078, 0.071]       | [-0.079, 0.070]             | [-0.078, 0.071]        | [-0.081, 0.068]         | [-0.081, 0.069]              | [-0.146, 0.074]                                | [-0.050, 0.079]                  | [-0.147, 0.073]                                | [-0.051, 0.078]                  |
| MOT_ANC                                                | 0.055 <sup>***</sup>  | 0.056 <sup>***</sup>        | 0.055 <sup>***</sup>   | 0.055 <sup>***</sup>    | 0.055 <sup>***</sup>         | 0.037 <sup>***</sup>                           | 0.059 <sup>***</sup>             | 0.037 <sup>***</sup>                           | 0.059 <sup>***</sup>             |
|                                                        | [0.046, 0.064]        | [0.047, 0.064]              | [0.046, 0.064]         | [0.046, 0.064]          | [0.047, 0.064]               | [0.025, 0.049]                                 | [0.051, 0.067]                   | [0.025, 0.050]                                 | [0.051, 0.067]                   |
| MOT_EDM                                                | 0.061 <sup>***</sup>  | 0.061 <sup>***</sup>        | 0.061 <sup>***</sup>   | 0.061 <sup>***</sup>    | 0.062 <sup>***</sup>         | 0.050 <sup>***</sup>                           | 0.057 <sup>***</sup>             | 0.049 <sup>***</sup>                           | 0.057 <sup>***</sup>             |
|                                                        | [0.043, 0.079]        | [0.044, 0.079]              | [0.043, 0.079]         | [0.043, 0.079]          | [0.044, 0.080]               | [0.023, 0.077]                                 | [0.041, 0.072]                   | [0.022, 0.076]                                 | [0.041, 0.072]                   |
| MOT_EDF                                                | 0.010                 | 0.010                       | 0.010                  | 0.009                   | 0.010                        | -0.021                                         | 0.008                            | -0.021                                         | 0.008                            |
|                                                        | [-0.008, 0.028]       | [-0.008, 0.028]             | [-0.008, 0.028]        | [-0.009, 0.028]         | [-0.009, 0.028]              | [-0.049, 0.007]                                | [-0.008, 0.024]                  | [-0.049, 0.008]                                | [-0.008, 0.024]                  |
| MOT_AWE                                                | 2.972 <sup>***</sup>  | 2.969 <sup>***</sup>        | 2.972 <sup>***</sup>   | 2.957 <sup>***</sup>    | 2.965 <sup>***</sup>         | 0.000                                          | 2.990 <sup>***</sup>             | 0.000                                          | 2.986 <sup>***</sup>             |
|                                                        | [2.848, 3.096]        | [2.846, 3.093]              | [2.848, 3.096]         | [2.833, 3.080]          | [2.841, 3.089]               | [0.000, 0.000]                                 | [2.882, 3.099]                   | [0.000, 0.000]                                 | [2.878, 3.095]                   |
| MOT_AGE                                                | 0.026 <sup>***</sup>  | 0.026 <sup>***</sup>        | 0.026 <sup>***</sup>   | 0.026 <sup>***</sup>    | 0.027 <sup>***</sup>         | 0.037 <sup>***</sup>                           | 0.031 <sup>***</sup>             | 0.037 <sup>***</sup>                           | 0.032 <sup>***</sup>             |
|                                                        | [0.018, 0.035]        | [0.018, 0.035]              | [0.018, 0.035]         | [0.017, 0.035]          | [0.018, 0.035]               | [0.024, 0.050]                                 | [0.024, 0.039]                   | [0.024, 0.050]                                 | [0.024, 0.039]                   |
| HH_RUR                                                 | -0.087 <sup>***</sup> | -0.090 <sup>***</sup>       | -0.087 <sup>***</sup>  | -0.093 <sup>***</sup>   | -0.096 <sup>***</sup>        | -0.182 <sup>***</sup>                          | -0.094 <sup>***</sup>            | -0.184 <sup>***</sup>                          | -0.097 <sup>***</sup>            |
|                                                        | [-0.190, 0.016]       | [-0.193, 0.013]             | [-0.190, 0.016]        | [-0.195, 0.010]         | [-0.201, 0.005]              | [-0.324, -0.039]                               | [-0.186, -0.002]                 | [-0.326, -0.042]                               | [-0.189, -0.005]                 |
| HH_REL (ref: Catholic): Other Christian                | -0.126 <sup>†</sup>   | -0.128 <sup>†</sup>         | -0.126 <sup>†</sup>    | -0.130 <sup>†</sup>     | -0.124 <sup>†</sup>          | -0.131                                         | -0.105 <sup>†</sup>              | -0.133                                         | -0.107 <sup>†</sup>              |
|                                                        | [-0.267, 0.015]       | [-0.269, 0.013]             | [-0.267, 0.015]        | [-0.271, 0.011]         | [-0.265, 0.017]              | [-0.318, 0.056]                                | [-0.230, 0.020]                  | [-0.320, 0.054]                                | [-0.232, 0.018]                  |
| HH_REL (ref: Catholic): Islam                          | -0.472 <sup>***</sup> | -0.481 <sup>***</sup>       | -0.472 <sup>***</sup>  | -0.467 <sup>***</sup>   | -0.476 <sup>***</sup>        | -0.460 <sup>***</sup>                          | -0.427 <sup>***</sup>            | -0.472 <sup>***</sup>                          | -0.434 <sup>***</sup>            |
|                                                        | [-0.644, -0.300]      | [-0.653, -0.308]            | [-0.645, -0.300]       | [-0.639, -0.295]        | [-0.649, -0.304]             | [-0.697, -0.222]                               | [-0.580, -0.275]                 | [-0.709, -0.234]                               | [-0.586, -0.281]                 |
| HH_REL (ref: Catholic): Traditionalist                 | -0.546 <sup>***</sup> | -0.543 <sup>***</sup>       | -0.546 <sup>***</sup>  | -0.552 <sup>***</sup>   | -0.559 <sup>***</sup>        | -0.470                                         | -0.513 <sup>***</sup>            | -0.474                                         | -0.508 <sup>***</sup>            |
|                                                        | [-0.954, -0.139]      | [-0.950, -0.137]            | [-0.954, -0.139]       | [-0.959, -0.146]        | [-0.967, -0.152]             | [-1.121, 0.182]                                | [-0.892, -0.135]                 | [-1.126, 0.178]                                | [-0.886, -0.129]                 |
| HH_REL (ref: Catholic): Other                          | -0.228                | -0.222                      | -0.229                 | -0.207                  | -0.185                       | -0.956                                         | -0.158                           | -0.957                                         | -0.160                           |
|                                                        | [-1.246, 0.789]       | [-1.236, 0.792]             | [-1.246, 0.789]        | [-1.220, 0.805]         | [-1.198, 0.827]              | [-2.528, 0.616]                                | [-0.927, 0.611]                  | [-2.528, 0.614]                                | [-0.927, 0.608]                  |
| HH_ETH (ref: Ekoi): Fulani                             | -0.930 <sup>***</sup> | -0.958 <sup>***</sup>       | -0.931 <sup>***</sup>  | -0.866 <sup>***</sup>   | -0.900 <sup>***</sup>        | -0.782 <sup>***</sup>                          | -0.961 <sup>***</sup>            | -0.799 <sup>***</sup>                          | -0.983 <sup>***</sup>            |
|                                                        | [-1.438, -0.422]      | [-1.467, -0.450]            | [-1.438, -0.423]       | [-1.374, -0.358]        | [-1.411, -0.390]             | [-1.430, -0.133]                               | [-1.423, -0.499]                 | [-1.448, -0.149]                               | [-1.445, -0.521]                 |
| HH_ETH (ref: Ekoi): Hausa                              | -0.851 <sup>***</sup> | -0.892 <sup>***</sup>       | -0.852 <sup>***</sup>  | -0.777 <sup>***</sup>   | -0.828 <sup>***</sup>        | -0.983 <sup>***</sup>                          | -0.771 <sup>***</sup>            | -1.018 <sup>***</sup>                          | -0.798 <sup>***</sup>            |
|                                                        | [-1.337, -0.365]      | [-1.379, -0.404]            | [-1.339, -0.365]       | [-1.263, -0.290]        | [-1.318, -0.339]             | [-1.585, -0.382]                               | [-1.217, -0.325]                 | [-1.621, -0.414]                               | [-1.245, -0.352]                 |
| HH_ETH (ref: Ekoi): Ibibio                             | -0.636 <sup>***</sup> | -0.629 <sup>***</sup>       | -0.636 <sup>***</sup>  | -0.589 <sup>***</sup>   | -0.579 <sup>***</sup>        | -0.704 <sup>***</sup>                          | -0.622 <sup>***</sup>            | -0.696 <sup>***</sup>                          | -0.620 <sup>***</sup>            |
|                                                        | [-1.171, -0.101]      | [-1.165, -0.094]            | [-1.171, -0.101]       | [-1.123, -0.055]        | [-1.115, -0.044]             | [-1.360, -0.047]                               | [-1.117, -0.126]                 | [-1.354, -0.038]                               | [-1.115, -0.124]                 |
| HH_ETH (ref: Ekoi): Igala                              | -0.660 <sup>***</sup> | -0.659 <sup>***</sup>       | -0.660 <sup>***</sup>  | -0.610 <sup>***</sup>   | -0.600 <sup>***</sup>        | -0.540                                         | -0.519 <sup>***</sup>            | -0.532                                         | -0.521 <sup>†</sup>              |
|                                                        | [-1.245, -0.075]      | [-1.245, -0.073]            | [-1.246, -0.075]       | [-1.194, -0.026]        | [-1.186, -0.014]             | [-1.326, 0.246]                                | [-1.058, 0.020]                  | [-1.320, 0.255]                                | [-1.061, 0.018]                  |
| HH_ETH (ref: Ekoi): Igbo                               | -0.453 <sup>†</sup>   | -0.449 <sup>†</sup>         | -0.453 <sup>†</sup>    | -0.409 <sup>†</sup>     | -0.404 <sup>†</sup>          | -0.804 <sup>***</sup>                          | -0.428 <sup>†</sup>              | -0.804 <sup>***</sup>                          | -0.427 <sup>†</sup>              |
|                                                        | [-0.922, 0.016]       | [-0.919, 0.020]             | [-0.922, 0.016]        | [-0.876, 0.059]         | [-0.874, 0.065]              | [-1.362, -0.245]                               | [-0.864, 0.009]                  | [-1.364, -0.245]                               | [-0.864, 0.009]                  |
| HH_ETH (ref: Ekoi): Ijaw / Izon                        | -0.489 <sup>†</sup>   | -0.487 <sup>†</sup>         | -0.489 <sup>†</sup>    | -0.456 <sup>†</sup>     | -0.443 <sup>†</sup>          | -1.058 <sup>***</sup>                          | -0.358                           | -1.051 <sup>***</sup>                          | -0.357                           |
|                                                        | [-1.029, 0.052]       | [-1.029, 0.054]             | [-1.029, 0.052]        | [-0.995, 0.083]         | [-0.984, 0.098]              | [-1.737, -0.378]                               | [-0.859, 0.143]                  | [-1.731, -0.370]                               | [-0.858, 0.145]                  |
| HH_ETH (ref: Ekoi): Kanuri / Beriberi                  | -0.994 <sup>***</sup> | -1.025 <sup>***</sup>       | -0.994 <sup>***</sup>  | -0.900 <sup>***</sup>   | -0.966 <sup>***</sup>        | -1.482 <sup>***</sup>                          | -0.949 <sup>***</sup>            | -1.518 <sup>***</sup>                          | -0.972 <sup>***</sup>            |
|                                                        | [-1.598, -0.389]      | [-1.630, -0.420]            | [-1.599, -0.390]       | [-1.504, -0.295]        | [-1.574, -0.359]             | [-2.320, -0.643]                               | [-1.492, -0.405]                 | [-2.357, -0.679]                               | [-1.515, -0.428]                 |
| HH_ETH (ref: Ekoi): Tiv                                | -0.601 <sup>***</sup> | -0.618 <sup>***</sup>       | -0.602 <sup>***</sup>  | -0.566 <sup>***</sup>   | -0.565 <sup>***</sup>        | -1.137 <sup>***</sup>                          | -0.497 <sup>***</sup>            | -1.145 <sup>***</sup>                          | -0.515 <sup>***</sup>            |
|                                                        | [-1.158, -0.045]      | [-1.175, -0.060]            | [-1.158, -0.045]       | [-1.121, -0.010]        | [-1.123, -0.007]             | [-1.828, -0.445]                               | [-1.010, 0.017]                  | [-1.838, -0.452]                               | [-1.028, -0.001]                 |
| HH_ETH (ref: Ekoi): Yoruba                             | -0.574 <sup>***</sup> | -0.573 <sup>***</sup>       | -0.574 <sup>***</sup>  | -0.526 <sup>***</sup>   | -0.527 <sup>***</sup>        | -0.775 <sup>***</sup>                          | -0.479 <sup>***</sup>            | -0.773 <sup>***</sup>                          | -0.480 <sup>***</sup>            |
|                                                        | [-1.051, -0.096]      | [-1.051, -0.095]            | [-1.051, -0.096]       | [-1.002, -0.050]        | [-1.006, -0.049]             | [-1.351, -0.198]                               | [-0.923, -0.036]                 | [-1.351, -0.195]                               | [-0.924, -0.036]                 |
| HH_ETH (ref: Ekoi): Other                              | -0.620 <sup>***</sup> | -0.632 <sup>***</sup>       | -0.620 <sup>***</sup>  | -0.558 <sup>***</sup>   | -0.577 <sup>***</sup>        | -0.802 <sup>***</sup>                          | -0.542 <sup>***</sup>            | -0.810 <sup>***</sup>                          | -0.553 <sup>***</sup>            |
|                                                        | [-1.081, -0.158]      | [-1.094, -0.170]            | [-1.082, -0.159]       | [-1.019, -0.097]        | [-1.040, -0.113]             | [-1.356, -0.248]                               | [-0.970, -0.114]                 | [-1.365, -0.254]                               | [-0.981, -0.125]                 |
| HH_SIZ                                                 | -0.013 <sup>†</sup>   | -0.013 <sup>†</sup>         | -0.013 <sup>†</sup>    | -0.013 <sup>†</sup>     | -0.013 <sup>†</sup>          | -0.023 <sup>†</sup>                            | -0.006                           | -0.023 <sup>†</sup>                            | -0.006                           |
|                                                        | [-0.026, -0.000]      | [-0.026, -0.001]            | [-0.026, -0.000]       | [-0.026, -0.001]        | [-0.026, -0.001]             | [-0.042, -0.003]                               | [-0.016, 0.005]                  | [-0.042, -0.003]                               | [-0.016, 0.005]                  |
| HH_WEA                                                 | 0.142 <sup>***</sup>  | 0.141 <sup>***</sup>        | 0.142 <sup>***</sup>   | 0.141 <sup>***</sup>    | 0.142 <sup>***</sup>         | 0.119 <sup>***</sup>                           | 0.119 <sup>***</sup>             | 0.118 <sup>***</sup>                           | 0.119 <sup>***</sup>             |
|                                                        | [0.122, 0.162]        | [0.121, 0.161]              | [0.122, 0.162]         | [0.121, 0.161]          | [0.123, 0.162]               | [0.090, 0.147]                                 | [0.102, 0.136]                   | [0.089, 0.146]                                 | [0.102, 0.135]                   |
| YEAR (ref: 2003): 2008                                 | 0.606 <sup>***</sup>  | 0.604 <sup>***</sup>        | 0.606 <sup>***</sup>   | 0.693 <sup>***</sup>    | 0.944                        | 0.753 <sup>***</sup>                           | 0.712 <sup>***</sup>             | 0.745 <sup>***</sup>                           | 0.710 <sup>***</sup>             |
|                                                        | [0.346, 0.866]        | [0.343, 0.865]              | [0.346, 0.866]         | [0.102, 1.283]          | [-1.902, 3.790]              | [0.392, 1.113]                                 | [0.470, 0.954]                   | [0.384, 1.107]                                 | [0.467, 0.953]                   |
| YEAR (ref: 2003): 2013                                 | 0.749 <sup>***</sup>  | 0.740 <sup>***</sup>        | 0.748 <sup>***</sup>   | 0.703 <sup>***</sup>    | 0.779                        | 0.873 <sup>***</sup>                           | 0.902 <sup>***</sup>             | 0.864 <sup>***</sup>                           | 0.894 <sup>***</sup>             |
|                                                        | [0.491, 1.006]        | [0.482, 0.999]              | [0.491, 1.006]         | [0.117, 1.289]          | [-2.061, 3.618]              | [0.518, 1.228]                                 | [0.662, 1.142]                   | [0.509, 1.220]                                 | [0.653, 1.135]                   |
| YEAR (ref: 2003): 2018                                 | 0.843 <sup>***</sup>  | 0.919 <sup>***</sup>        | 0.844 <sup>***</sup>   | 0.771 <sup>***</sup>    | 0.977                        | 1.161 <sup>***</sup>                           | 1.056 <sup>***</sup>             | 1.222 <sup>***</sup>                           | 1.115 <sup>***</sup>             |
|                                                        | [0.578, 1.108]        | [0.654, 1.183]              |                        |                         |                              |                                                |                                  |                                                |                                  |

Table 3b: Robustness Check (3-Level models): Link between SIA exposure and routine childhood immunisation uptake

| Dependent variable: non-polio full immunisation status | Main results                  |                               |                               |                               |                               | Robustness checks: reporting                   |                                  |                                                |                                  |
|--------------------------------------------------------|-------------------------------|-------------------------------|-------------------------------|-------------------------------|-------------------------------|------------------------------------------------|----------------------------------|------------------------------------------------|----------------------------------|
|                                                        | Full model                    | Exposure decomposition        | Interaction model (EXPxAGE)   | Year-Interaction models       |                               | Full model                                     |                                  | Interaction model (EXPxAGE)                    |                                  |
|                                                        |                               |                               |                               | (EXPxYR)                      | (EXPxAGExYR)                  | Only health card reported vaccines (VAC_norep) | Date approximation (EXP_CHI_nod) | Only health card reported vaccines (VAC_norep) | Date approximation (EXP_CHI_nod) |
| EXP_CHI                                                | -0.020***<br>[-0.033, -0.006] |                               | 0.023*<br>[-0.001, 0.047]     | -0.067<br>[-0.231, 0.098]     | -0.453<br>[-1.359, 0.453]     | 0.001<br>[-0.021, 0.022]                       | -0.022***<br>[-0.034, -0.011]    | 0.043*<br>[0.007, 0.079]                       | 0.010<br>[-0.009, 0.030]         |
| EXP_CHI_RI                                             |                               | -0.020<br>[-0.046, 0.005]     |                               |                               |                               |                                                |                                  |                                                |                                  |
| EXP_CHI_FU                                             |                               | -0.020***<br>[-0.034, -0.005] |                               |                               |                               |                                                |                                  |                                                |                                  |
| EXPxAGE                                                |                               |                               | -0.001***<br>[-0.001, -0.001] |                               | 0.015<br>[-0.037, 0.066]      |                                                |                                  | -0.001***<br>[-0.002, -0.000]                  | -0.001***<br>[-0.001, -0.000]    |
| EXPxYR<br>[yr = 2008]                                  |                               |                               |                               | 0.028<br>[-0.135, 0.191]      | 0.449<br>[-0.456, 1.354]      |                                                |                                  |                                                |                                  |
| EXPxYR<br>[yr = 2013]                                  |                               |                               |                               | 0.043<br>[-0.120, 0.206]      | 0.481<br>[-0.424, 1.386]      |                                                |                                  |                                                |                                  |
| EXPxYR<br>[yr = 2018]                                  |                               |                               |                               | 0.057<br>[-0.107, 0.220]      | 0.624<br>[-0.286, 1.534]      |                                                |                                  |                                                |                                  |
| AGExYR<br>[yr = 2008]                                  |                               |                               |                               |                               | -0.071<br>[-0.259, 0.117]     |                                                |                                  |                                                |                                  |
| AGExYR<br>[yr = 2013]                                  |                               |                               |                               |                               | -0.067<br>[-0.255, 0.121]     |                                                |                                  |                                                |                                  |
| AGExYR<br>[yr = 2018]                                  |                               |                               |                               |                               | -0.070<br>[-0.259, 0.118]     |                                                |                                  |                                                |                                  |
| EXPxAGExYR<br>[yr = 2008]                              |                               |                               |                               |                               | -0.015<br>[-0.067, 0.037]     |                                                |                                  |                                                |                                  |
| EXPxAGExYR<br>[yr = 2013]                              |                               |                               |                               |                               | -0.016<br>[-0.068, 0.036]     |                                                |                                  |                                                |                                  |
| EXPxAGExYR<br>[yr = 2018]                              |                               |                               |                               |                               | -0.021<br>[-0.073, 0.032]     |                                                |                                  |                                                |                                  |
| CHI_AGE                                                | 0.076***<br>[0.061, 0.091]    | 0.076***<br>[0.061, 0.091]    | 0.036***<br>[0.029, 0.042]    | 0.032***<br>[0.025, 0.038]    | 0.106<br>[-0.082, 0.294]      | 0.068***<br>[0.045, 0.091]                     | 0.069***<br>[0.055, 0.082]       | 0.032***<br>[0.022, 0.043]                     | 0.034***<br>[0.028, 0.040]       |
| CHI_AGE2                                               | -0.001***<br>[-0.001, -0.001] | -0.001***<br>[-0.001, -0.001] |                               |                               |                               | -0.001***<br>[-0.001, -0.000]                  | -0.001***<br>[-0.001, -0.000]    |                                                |                                  |
| CHI_ORD                                                | -0.060***<br>[-0.085, -0.036] | -0.060***<br>[-0.085, -0.036] | -0.061***<br>[-0.086, -0.036] | -0.061***<br>[-0.085, -0.036] | -0.061***<br>[-0.086, -0.037] | -0.082***<br>[-0.120, -0.045]                  | -0.075***<br>[-0.097, -0.054]    | -0.082***<br>[-0.120, -0.045]                  | -0.076***<br>[-0.098, -0.054]    |
| CHI_SEX                                                | -0.002<br>[-0.076, 0.073]     | -0.002<br>[-0.076, 0.073]     | -0.003<br>[-0.077, 0.072]     | -0.004<br>[-0.079, 0.070]     | -0.004<br>[-0.078, 0.070]     | -0.040<br>[-0.150, 0.069]                      | 0.014<br>[-0.050, 0.079]         | -0.041<br>[-0.151, 0.069]                      | 0.013<br>[-0.052, 0.078]         |
| MOT_ANC                                                | 0.057***<br>[0.048, 0.066]    | 0.057***<br>[0.048, 0.066]    | 0.057***<br>[0.048, 0.066]    | 0.056***<br>[0.048, 0.065]    | 0.057***<br>[0.048, 0.066]    | 0.038***<br>[0.025, 0.051]                     | 0.060***<br>[0.052, 0.068]       | 0.038***<br>[0.025, 0.051]                     | 0.060***<br>[0.052, 0.068]       |
| MOT_EDM                                                | 0.060***<br>[0.042, 0.078]    | 0.060***<br>[0.042, 0.078]    | 0.060***<br>[0.042, 0.078]    | 0.060***<br>[0.042, 0.078]    | 0.061***<br>[0.043, 0.079]    | 0.049***<br>[0.022, 0.076]                     | 0.056***<br>[0.040, 0.071]       | 0.048***<br>[0.021, 0.075]                     | 0.056***<br>[0.040, 0.071]       |
| MOT_EDF                                                | 0.009<br>[-0.010, 0.027]      | 0.009<br>[-0.010, 0.027]      | 0.009<br>[-0.010, 0.027]      | 0.008<br>[-0.010, 0.027]      | 0.008<br>[-0.010, 0.027]      | -0.023<br>[-0.051, 0.005]                      | 0.007<br>[-0.008, 0.023]         | -0.023<br>[-0.051, 0.005]                      | 0.007<br>[-0.009, 0.023]         |
| MOT_AWE                                                | 2.962***<br>[2.838, 3.086]    | 2.962***<br>[2.838, 3.086]    | 2.960***<br>[2.836, 3.084]    | 2.946***<br>[2.822, 3.070]    | 2.955***<br>[2.831, 3.079]    | 0.000<br>[0.000, 0.000]                        | 2.991***<br>[2.882, 3.100]       | 0.000<br>[0.000, 0.000]                        | 2.987***<br>[2.878, 3.096]       |
| MOT_AGE                                                | 0.027***<br>[0.018, 0.035]    | 0.027***<br>[0.018, 0.035]    | 0.027***<br>[0.018, 0.036]    | 0.027***<br>[0.018, 0.035]    | 0.027***<br>[0.019, 0.036]    | 0.037***<br>[0.024, 0.050]                     | 0.032***<br>[0.024, 0.039]       | 0.037***<br>[0.024, 0.050]                     | 0.032***<br>[0.024, 0.039]       |
| HH_RUR                                                 | -0.062<br>[-0.165, 0.040]     | -0.062<br>[-0.165, 0.040]     | -0.065<br>[-0.168, 0.038]     | -0.068<br>[-0.170, 0.035]     | -0.072<br>[-0.175, 0.031]     | -0.176**<br>[-0.320, -0.033]                   | -0.066<br>[-0.159, 0.026]        | -0.180**<br>[-0.323, -0.037]                   | -0.068<br>[-0.161, 0.024]        |
| HH_REL (ref: Catholic): Other Christian                | -0.112<br>[-0.254, 0.030]     | -0.112<br>[-0.253, 0.030]     | -0.114<br>[-0.256, 0.028]     | -0.116<br>[-0.257, 0.025]     | -0.109<br>[-0.251, 0.033]     | -0.160<br>[-0.349, 0.029]                      | -0.093<br>[-0.218, 0.033]        | -0.163*<br>[-0.352, 0.026]                     | -0.094<br>[-0.220, 0.031]        |
| HH_REL (ref: Catholic): Islam                          | -0.429***<br>[-0.605, -0.254] | -0.429***<br>[-0.605, -0.254] | -0.433***<br>[-0.608, -0.257] | -0.430***<br>[-0.605, -0.255] | -0.432***<br>[-0.607, -0.256] | -0.437***<br>[-0.680, -0.194]                  | -0.392***<br>[-0.548, -0.237]    | -0.447***<br>[-0.690, -0.204]                  | -0.394***<br>[-0.550, -0.239]    |
| HH_REL (ref: Catholic): Traditionalist                 | -0.498**<br>[-0.906, -0.091]  | -0.498**<br>[-0.906, -0.090]  | -0.493**<br>[-0.901, -0.085]  | -0.503**<br>[-0.910, -0.096]  | -0.509**<br>[-0.918, -0.101]  | -0.476<br>[-1.127, 0.176]                      | -0.459**<br>[-0.840, -0.079]     | -0.480<br>[-1.131, 0.172]                      | -0.453**<br>[-0.833, -0.073]     |
| HH_REL (ref: Catholic): Other                          | -0.318<br>[-1.344, 0.709]     | -0.318<br>[-1.345, 0.708]     | -0.316<br>[-1.339, 0.708]     | -0.292<br>[-1.312, 0.729]     | -0.280<br>[-1.302, 0.742]     | -1.100<br>[-2.685, 0.485]                      | -0.212<br>[-0.986, 0.562]        | -1.106<br>[-2.689, 0.478]                      | -0.215<br>[-0.989, 0.558]        |
| HH_ETH (ref: Ekoi): Fulani                             | -0.802***<br>[-1.341, -0.262] | -0.802***<br>[-1.342, -0.263] | -0.816***<br>[-1.357, -0.275] | -0.751***<br>[-1.290, -0.212] | -0.772***<br>[-1.314, -0.229] | -0.833***<br>[-1.522, -0.145]                  | -0.888***<br>[-1.378, -0.399]    | -0.845***<br>[-1.535, -0.155]                  | -0.901***<br>[-1.391, -0.411]    |
| HH_ETH (ref: Ekoi): Hausa                              | -0.703***<br>[-1.227, -0.179] | -0.703***<br>[-1.227, -0.179] | -0.722***<br>[-1.248, -0.196] | -0.649***<br>[-1.172, -0.125] | -0.677***<br>[-1.205, -0.150] | -1.106***<br>[-1.756, -0.455]                  | -0.673***<br>[-1.152, -0.195]    | -1.131***<br>[-1.783, -0.479]                  | -0.686***<br>[-1.165, -0.207]    |
| HH_ETH (ref: Ekoi): Ibibio                             | -0.468<br>[-1.030, 0.095]     | -0.468<br>[-1.030, 0.095]     | -0.458<br>[-1.022, 0.106]     | -0.418<br>[-0.980, 0.144]     | -0.419<br>[-0.983, 0.145]     | -0.550<br>[-1.258, 0.159]                      | -0.492**<br>[-1.009, 0.026]      | -0.537<br>[-1.247, 0.173]                      | -0.489<br>[-1.007, 0.029]        |
| HH_ETH (ref: Ekoi): Igala                              | -0.637**<br>[-1.266, -0.008]  | -0.637**<br>[-1.266, -0.009]  | -0.639**<br>[-1.268, -0.009]  | -0.595**<br>[-1.222, 0.032]   | -0.594**<br>[-1.224, 0.036]   | -0.651<br>[-1.495, 0.194]                      | -0.505**<br>[-1.080, 0.069]      | -0.646<br>[-1.492, 0.200]                      | -0.510**<br>[-1.085, 0.065]      |
| HH_ETH (ref: Ekoi): Igbo                               | -0.332<br>[-0.849, 0.185]     | -0.332<br>[-0.849, 0.185]     | -0.324<br>[-0.842, 0.195]     | -0.291<br>[-0.806, 0.225]     | -0.294<br>[-0.812, 0.225]     | -0.737**<br>[-1.358, -0.116]                   | -0.382<br>[-0.859, 0.095]        | -0.732**<br>[-1.354, -0.109]                   | -0.382<br>[-0.859, 0.095]        |
| HH_ETH (ref: Ekoi): Ijaw / Izon                        | -0.545**<br>[-1.142, 0.053]   | -0.545**<br>[-1.142, 0.053]   | -0.548**<br>[-1.147, 0.052]   | -0.512**<br>[-1.108, 0.084]   | -0.507**<br>[-1.106, 0.092]   | -1.211***<br>[-1.974, -0.448]                  | -0.417<br>[-0.964, 0.130]        | -1.202***<br>[-1.966, -0.437]                  | -0.418<br>[-0.966, 0.129]        |
| HH_ETH (ref: Ekoi): Kanuri / Beriberi                  | -0.751***<br>[-1.386, -0.116] | -0.751***<br>[-1.387, -0.116] | -0.765***<br>[-1.401, -0.128] | -0.678***<br>[-1.312, -0.043] | -0.729***<br>[-1.367, -0.091] | -1.423***<br>[-2.294, -0.552]                  | -0.809***<br>[-1.379, -0.240]    | -1.450***<br>[-2.322, -0.578]                  | -0.821***<br>[-1.391, -0.251]    |
| HH_ETH (ref: Ekoi): Tiv                                | -0.556*<br>[-1.178, 0.067]    | -0.556*<br>[-1.178, 0.067]    | -0.571*<br>[-1.195, 0.053]    | -0.530*<br>[-1.151, 0.091]    | -0.526*<br>[-1.150, 0.099]    | -0.969**<br>[-1.750, -0.188]                   | -0.482**<br>[-1.052, 0.088]      | -0.974**<br>[-1.757, -0.191]                   | -0.497**<br>[-1.067, 0.074]      |
| HH_ETH (ref: Ekoi): Yoruba                             | -0.428<br>[-0.950, 0.094]     | -0.428<br>[-0.950, 0.094]     | -0.427<br>[-0.950, 0.097]     | -0.386<br>[-0.907, 0.135]     | -0.394<br>[-0.918, 0.130]     | -0.630<br>[-1.269, 0.009]                      | -0.371<br>[-0.853, 0.111]        | -0.624<br>[-1.265, 0.016]                      | -0.373<br>[-0.855, 0.110]        |
| HH_ETH (ref: Ekoi): Other                              | -0.526**<br>[-1.020, -0.031]  | -0.526**<br>[-1.021, -0.032]  | -0.530**<br>[-1.026, -0.034]  | -0.475**<br>[-0.969, 0.019]   | -0.487**<br>[-0.984, 0.010]   | -0.828***<br>[-1.426, -0.230]                  | -0.496**<br>[-0.952, -0.039]     | -0.833***<br>[-1.432, -0.233]                  | -0.501**<br>[-0.958, -0.044]     |
| HH_SIZ                                                 | -0.014**<br>[-0.027, -0.001]  | -0.014**<br>[-0.027, -0.001]  | -0.014**<br>[-0.027, -0.001]  | -0.014**<br>[-0.027, -0.001]  | -0.014**<br>[-0.027, -0.001]  | -0.023**<br>[-0.043, -0.004]                   | -0.007<br>[-0.017, 0.004]        | -0.024**<br>[-0.043, -0.004]                   | -0.007<br>[-0.017, 0.004]        |
| HH_WEA                                                 | 0.140***<br>[0.121, 0.160]    | 0.140***<br>[0.121, 0.160]    | 0.139***<br>[0.119, 0.159]    | 0.140***<br>[0.120, 0.159]    | 0.141***<br>[0.121, 0.161]    | 0.116***<br>[0.087, 0.145]                     | 0.119***<br>[0.102, 0.136]       | 0.115***<br>[0.086, 0.144]                     | 0.118***<br>[0.101, 0.135]       |
| YEAR (ref: 2003): 2008                                 | 0.636***<br>[0.377, 0.894]    | 0.636***<br>[0.377, 0.894]    | 0.625***<br>[0.366, 0.885]    | 0.662***<br>[0.076, 1.248]    | 1.088<br>[-1.748, 3.924]      | 0.789***<br>[0.429, 1.149]                     | 0.729***<br>[0.487, 0.971]       | 0.774***<br>[0.414, 1.135]                     | 0.723***<br>[0.480, 0.965]       |
| YEAR (ref: 2003): 2013                                 | 0.768***<br>[0.511, 1.025]    | 0.768***<br>[0.511, 1.025]    | 0.746***<br>[0.487, 1.005]    | 0.679***<br>[0.097, 1.261]    | 0.943<br>[-1.887, 3.773]      | 0.894***<br>[0.538, 1.250]                     | 0.908***<br>[0.667, 1.148]       | 0.875***<br>[0.518, 1.233]                     | 0.893***<br>[0.651, 1.134]       |
| YEAR (ref: 2003): 2018                                 | 0.899***<br>[0.635, 1.163]    | 0.900***<br>[0.635, 1.164]    | 0.980***<br>[0.717, 1.243]    | 0.774***<br>[0.182, 1.367]    | 1.222<br>[-1.626, 4.069]      | 1.202***<br>[0.838, 1.567]                     | 1.094***<br>[0.855, 1.333]       | 1.266***<br>[0.902, 1.629]                     | 1.155***<br>[0.917, 1.393]       |
| Constant                                               | -5.446***<br>[-6.091, -4.801] | -5.445***<br>[-6.090, -4.800] | -5.111***<br>[-5.743, -4.479] | -4.829***<br>[-5.638, -4.021] | -5.451***<br>[-6.332, -2.571] | -1.929***<br>[-2.749, -1.108]                  | -5.572***<br>[-6.166, -4.979]    | -1.635***<br>[-2.430, -0.839]                  | -5.271***<br>[-5.853, -4.690]    |
| Multilevel variance parameter: Level 1                 | 0.133***<br>[0.054, 0.211]    | 0.133***<br>[0.054, 0.212]    | 0.144***<br>[0.058, 0.231]    | 0.127***<br>[0.052, 0.202]    | 0.140***<br>[0.056, 0.223]    | 0.114***<br>[0.036, 0.192]                     | 0.146***<br>[0.064, 0.227]       | 0.118***<br>[0.038, 0.197]                     | 0.152***<br>[0.067, 0.237]       |
| Multilevel variance parameter: Level 2                 | 0.177***<br>[0.122, 0.233]    | 0.177***<br>[0.122, 0.233]    | 0.176***<br>[0.120, 0.231]    | 0.174***<br>[0.119, 0.229]    | 0.174***<br>[0.119, 0.229]    | 0.165***<br>[0.086, 0.244]                     | 0.225***<br>[0.168, 0.283]       | 0.164***<br>[0.085, 0.243]                     | 0.222***<br>[0.166, 0.279]       |
| Level 1 Observations (child)                           | 24381                         | 24381                         | 24381                         | 24381                         | 24381                         | 6514                                           | 31805                            | 6514                                           | 31805                            |
| Level 2 Observations (LGA)                             | 684                           | 684                           | 684                           | 684                           | 684                           | 622                                            | 687                              | 622                                            | 687                              |
| Level 3 Observations (state)                           | 37                            | 37                            | 37                            | 37                            | 37                            | 37                                             | 37                               | 37                                             | 37                               |
| Akaike Information Criterion                           | 17947.458                     | 17949.558                     | 17969.372                     | 17988.064                     | 17966.35                      | 7940.803                                       | 23768.277                        | 7947.817                                       | 23790.225                        |
| Prob. > X <sup>2</sup>                                 | <0.001                        | <0.001                        | <0.001                        | <0.001                        | <0.001                        | <0.001                                         | <0.001                           | <0.001                                         | <0.001                           |

95% confidence intervals in brackets

\* p &lt; 0.10, \*\* p &lt; 0.05, \*\*\* p &lt; 0.01

Table 4a: Detailed results: Link between SIA exposure and maternal health service uptake

| Dependent variables: various indicators of maternal healthcare access (see right) | Main results                  |                               |                               |                               |                               |  | Year-Interaction models       |                               |                               |                               |                               |  | Robustness checks: reporting (date approximation) |                               |                               |                               |                               |  |
|-----------------------------------------------------------------------------------|-------------------------------|-------------------------------|-------------------------------|-------------------------------|-------------------------------|--|-------------------------------|-------------------------------|-------------------------------|-------------------------------|-------------------------------|--|---------------------------------------------------|-------------------------------|-------------------------------|-------------------------------|-------------------------------|--|
|                                                                                   | Delivery                      |                               |                               | Antenatal care                |                               |  | Delivery                      |                               |                               | Antenatal care                |                               |  | Delivery                                          |                               |                               | Antenatal care                |                               |  |
|                                                                                   | At home                       | At private facility           | At public facility            | No. of antenatal care visits  | No. of tetanus injections     |  | At home                       | At private facility           | At public facility            | No. of antenatal care visits  | No. of tetanus injections     |  | At home                                           | At private facility           | At public facility            | No. of antenatal care visits  | No. of tetanus injections     |  |
| EXP_PREG                                                                          | 0.007<br>[-0.013, 0.027]      | -0.065***<br>[-0.093, -0.036] | 0.010<br>[-0.009, 0.029]      | -0.025***<br>[-0.054, 0.003]  | 0.001<br>[-0.008, 0.009]      |  | 0.102<br>[-0.086, 0.289]      | -0.094<br>[-0.332, 0.144]     | 0.005<br>[-0.177, 0.187]      | 0.027<br>[-0.239, 0.292]      | -0.040<br>[-0.107, 0.028]     |  | -0.004<br>[-0.019, 0.012]                         | -0.060***<br>[-0.084, -0.036] | 0.016**<br>[0.001, 0.031]     | -0.013<br>[-0.033, 0.007]     | 0.001<br>[-0.005, 0.008]      |  |
| EXPxYR<br>[yr = 2008]                                                             |                               |                               |                               |                               |                               |  | -0.064<br>[-0.253, 0.126]     | 0.013<br>[-0.230, 0.256]      | -0.027<br>[-0.212, 0.157]     | -0.065<br>[-0.337, 0.208]     | 0.009<br>[-0.060, 0.077]      |  |                                                   |                               |                               |                               |                               |  |
| EXPxYR<br>[yr = 2013]                                                             |                               |                               |                               |                               |                               |  | -0.110<br>[-0.298, 0.078]     | 0.028<br>[-0.213, 0.268]      | 0.023<br>[-0.159, 0.206]      | -0.130<br>[-0.401, 0.141]     | 0.037<br>[-0.032, 0.106]      |  |                                                   |                               |                               |                               |                               |  |
| EXPxYR<br>[yr = 2018]                                                             |                               |                               |                               |                               |                               |  | -0.097<br>[-0.286, 0.092]     | 0.047<br>[-0.195, 0.289]      | 0.002<br>[-0.181, 0.185]      | 0.034<br>[-0.237, 0.304]      | 0.064*<br>[-0.005, 0.133]     |  |                                                   |                               |                               |                               |                               |  |
| MOT_ANC                                                                           | -0.137***<br>[-0.146, -0.129] | 0.057***<br>[0.049, 0.065]    | 0.062***<br>[0.055, 0.068]    |                               |                               |  | -0.137***<br>[-0.146, -0.129] | 0.057***<br>[0.049, 0.064]    | 0.062***<br>[0.055, 0.068]    |                               |                               |  | -0.144***<br>[-0.151, -0.136]                     | 0.060***<br>[0.053, 0.068]    | 0.063***<br>[0.057, 0.069]    |                               |                               |  |
| MOT_EDM                                                                           | -0.065***<br>[-0.079, -0.050] | 0.052***<br>[0.032, 0.073]    | 0.057***<br>[0.043, 0.071]    | 0.097***<br>[0.074, 0.120]    | 0.031***<br>[0.024, 0.038]    |  | -0.065***<br>[-0.079, -0.050] | 0.052***<br>[0.032, 0.073]    | 0.057***<br>[0.043, 0.071]    | 0.097***<br>[0.074, 0.120]    | 0.031***<br>[0.024, 0.038]    |  | -0.066***<br>[-0.078, -0.053]                     | 0.051***<br>[0.033, 0.069]    | 0.061***<br>[0.049, 0.073]    | 0.095***<br>[0.075, 0.115]    | 0.031***<br>[0.025, 0.037]    |  |
| MOT_EDF                                                                           | -0.030***<br>[-0.045, -0.016] | 0.033***<br>[0.012, 0.054]    | 0.035***<br>[0.020, 0.049]    | 0.082***<br>[0.063, 0.102]    | 0.023***<br>[0.017, 0.029]    |  | -0.030***<br>[-0.045, -0.016] | 0.033***<br>[0.011, 0.054]    | 0.035***<br>[0.020, 0.049]    | 0.082***<br>[0.063, 0.101]    | 0.023***<br>[0.017, 0.029]    |  | -0.028***<br>[-0.040, -0.015]                     | 0.027***<br>[0.007, 0.046]    | 0.038***<br>[0.026, 0.050]    | 0.076***<br>[0.059, 0.092]    | 0.025***<br>[0.020, 0.031]    |  |
| MOT_AWE                                                                           | -0.913***<br>[-0.988, -0.838] | 0.284***<br>[0.172, 0.397]    | 0.978***<br>[0.901, 1.055]    | 1.946***<br>[1.813, 2.078]    | 0.643***<br>[0.603, 0.683]    |  | -0.911***<br>[-0.986, -0.835] | 0.282***<br>[0.169, 0.394]    | 0.977***<br>[0.900, 1.054]    | 1.928***<br>[1.796, 2.060]    | 0.637***<br>[0.596, 0.677]    |  | -0.903***<br>[-0.968, -0.837]                     | 0.282***<br>[0.181, 0.383]    | 0.957***<br>[0.890, 1.023]    | 1.905***<br>[1.791, 2.019]    | 0.646***<br>[0.611, 0.681]    |  |
| MOT_AGE                                                                           | -0.002<br>[-0.007, 0.003]     | 0.001<br>[-0.005, 0.008]      | 0.002<br>[-0.002, 0.007]      | 0.011***<br>[0.005, 0.017]    | 0.000<br>[-0.001, 0.002]      |  | -0.003<br>[-0.008, 0.002]     | 0.001<br>[-0.005, 0.008]      | 0.002<br>[-0.002, 0.007]      | 0.011***<br>[0.005, 0.017]    | 0.001<br>[-0.001, 0.002]      |  | 0.000<br>[-0.005, 0.004]                          | 0.001<br>[-0.005, 0.007]      | 0.001<br>[-0.003, 0.005]      | 0.007***<br>[0.001, 0.012]    | 0.000<br>[-0.002, 0.001]      |  |
| HH_RUR                                                                            | 0.538***<br>[0.448, 0.628]    | -0.374***<br>[-0.484, -0.264] | -0.325***<br>[-0.408, -0.241] | -0.588***<br>[-0.816, -0.360] | -0.156***<br>[-0.206, -0.105] |  | 0.542***<br>[0.452, 0.632]    | -0.376***<br>[-0.486, -0.266] | -0.329***<br>[-0.412, -0.245] | -0.585***<br>[-0.812, -0.359] | -0.159***<br>[-0.209, -0.108] |  | 0.487***<br>[0.407, 0.567]                        | -0.341***<br>[-0.441, -0.241] | -0.300***<br>[-0.373, -0.226] | -0.579***<br>[-0.779, -0.380] | -0.160***<br>[-0.209, -0.112] |  |
| HH_REL (ref: Catholic): Other Christian                                           | 0.094<br>[-0.030, 0.217]      | -0.097<br>[-0.219, 0.026]     | 0.012<br>[-0.097, 0.121]      | -0.055<br>[-0.277, 0.167]     | -0.046*<br>[-0.099, 0.006]    |  | 0.092<br>[-0.031, 0.215]      | -0.097<br>[-0.219, 0.026]     | 0.013<br>[-0.096, 0.122]      | -0.060<br>[-0.283, 0.163]     | -0.047*<br>[-0.100, 0.006]    |  | 0.103<br>[-0.007, 0.213]                          | -0.150***<br>[-0.259, -0.040] | 0.055<br>[-0.042, 0.152]      | -0.108<br>[-0.310, 0.094]     | -0.040<br>[-0.087, 0.008]     |  |
| HH_REL (ref: Catholic): Islam                                                     | 0.225***<br>[0.076, 0.375]    | -0.242***<br>[-0.403, -0.081] | -0.025<br>[-0.159, 0.110]     | -0.168<br>[-0.467, 0.130]     | -0.101***<br>[-0.174, -0.028] |  | 0.225***<br>[0.075, 0.374]    | -0.242***<br>[-0.403, -0.081] | -0.026<br>[-0.161, 0.108]     | -0.170<br>[-0.469, 0.130]     | -0.100***<br>[-0.173, -0.027] |  | 0.231***<br>[0.098, 0.365]                        | -0.289***<br>[-0.435, -0.144] | 0.022<br>[-0.098, 0.142]      | -0.234*<br>[-0.501, 0.034]    | -0.104***<br>[-0.171, -0.036] |  |
| HH_REL (ref: Catholic): Traditionalist                                            | 1.004***<br>[0.646, 1.362]    | -0.911***<br>[-1.380, -0.442] | -0.475***<br>[-0.838, -0.111] | -0.653***<br>[-1.130, -0.176] | -0.350***<br>[-0.480, -0.219] |  | 1.004***<br>[0.646, 1.362]    | -0.913***<br>[-1.382, -0.444] | -0.474***<br>[-0.837, -0.111] | -0.665***<br>[-1.143, -0.187] | -0.354***<br>[-0.485, -0.223] |  | 0.900***<br>[0.569, 1.231]                        | -0.866***<br>[-1.301, -0.430] | -0.406***<br>[-0.741, -0.070] | -0.619***<br>[-1.087, -0.151] | -0.282***<br>[-0.407, -0.158] |  |
| HH_REL (ref: Catholic): Other                                                     | -0.257<br>[-1.016, 0.503]     | 0.019<br>[-1.254, 1.292]      | 0.387<br>[-0.373, 1.148]      | -0.084<br>[-1.535, 1.366]     | -0.142<br>[-0.681, 0.397]     |  | -0.265<br>[-1.024, 0.495]     | 0.028<br>[-1.246, 1.302]      | 0.388<br>[-0.373, 1.149]      | 0.020<br>[-1.431, 1.471]      | -0.115<br>[-0.655, 0.424]     |  | -0.189<br>[-0.779, 0.401]                         | 0.115<br>[-0.877, 1.107]      | 0.286<br>[-0.301, 0.874]      | -0.783<br>[-1.829, 0.262]     | -0.287<br>[-0.662, 0.087]     |  |
| HH_ETH (ref: Ekoi): Fulani                                                        | 0.672***<br>[0.239, 1.104]    | -0.084<br>[-0.988, 0.821]     | -0.765***<br>[-1.190, -0.340] | -0.741<br>[-2.013, 0.531]     | -0.349***<br>[-0.591, -0.107] |  | 0.639***<br>[0.206, 1.072]    | -0.080<br>[-0.985, 0.825]     | -0.731***<br>[-1.156, -0.306] | -0.813<br>[-2.103, 0.477]     | -0.324***<br>[-0.566, -0.081] |  | 0.710***<br>[0.314, 1.106]                        | -0.065<br>[-0.816, 0.687]     | -0.808***<br>[-1.192, -0.425] | -0.646<br>[-1.867, 0.576]     | -0.331***<br>[-0.565, -0.097] |  |
| HH_ETH (ref: Ekoi): Hausa                                                         | 0.941***<br>[0.521, 1.360]    | -0.596<br>[-1.459, 0.266]     | -0.820***<br>[-1.231, -0.408] | -0.436<br>[-1.703, 0.830]     | -0.254***<br>[-0.493, -0.015] |  | 0.908***<br>[0.488, 1.328]    | -0.591<br>[-1.453, 0.271]     | -0.787***<br>[-1.199, -0.374] | -0.506<br>[-1.790, 0.778]     | -0.228*<br>[-0.468, 0.012]    |  | 0.971***<br>[0.584, 1.358]                        | -0.811***<br>[-1.537, -0.086] | -0.843***<br>[-1.216, -0.469] | -0.319<br>[-1.535, 0.896]     | -0.228*<br>[-0.459, 0.003]    |  |
| HH_ETH (ref: Ekoi): Ibibio                                                        | 0.378<br>[-0.094, 0.850]      | 0.562<br>[-0.336, 1.459]      | -0.310<br>[-0.771, 0.151]     | -0.197<br>[-1.463, 1.070]     | -0.102<br>[-0.385, 0.182]     |  | 0.350<br>[-0.122, 0.823]      | 0.565<br>[-0.332, 1.463]      | -0.281<br>[-0.742, 0.180]     | -0.254<br>[-1.535, 1.027]     | -0.081<br>[-0.366, 0.204]     |  | 0.538**<br>[0.099, 0.977]                         | 0.290<br>[-0.478, 1.058]      | -0.449**<br>[-0.871, -0.027]  | -0.011<br>[-1.219, 1.196]     | -0.113<br>[-0.385, 0.160]     |  |
| HH_ETH (ref: Ekoi): Igala                                                         | -0.510***<br>[-1.034, 0.015]  | 1.297***<br>[0.404, 2.190]    | 0.034<br>[-0.454, 0.522]      | 0.013<br>[-1.304, 1.329]      | 0.277*<br>[-0.017, 0.571]     |  | 1.301***<br>[0.408, 2.195]    | 0.069<br>[-0.419, 0.557]      | 0.069<br>[-1.400, 1.268]      | -0.066<br>[0.006, 0.595]      | 0.301***<br>[-0.895, 0.061]   |  | 0.417**<br>[0.195, 1.707]                         | -0.417**<br>[-0.405, 0.478]   | 0.037<br>[-1.004, 1.535]      | 0.266<br>[0.002, 0.591]       | 0.297**<br>[0.002, 0.591]     |  |
| HH_ETH (ref: Ekoi): Igbo                                                          | -0.788***<br>[-1.203, -0.372] | 1.877***<br>[1.046, 2.708]    | -0.575***<br>[-0.979, -0.171] | 1.258*<br>[-0.025, 2.540]     | 0.120<br>[-0.113, 0.353]      |  | 1.881***<br>[1.050, 2.712]    | -0.547***<br>[-0.952, -0.143] | 1.201*<br>[-0.099, 2.501]     | 0.141<br>[-0.092, 0.374]      | -0.742***<br>[-1.129, -0.354] |  | 1.545***<br>[0.846, 2.244]                        | -0.556***<br>[-0.925, -0.186] | 1.273***<br>[0.037, 2.509]    | 0.122<br>[-0.104, 0.348]      |                               |  |
| HH_ETH (ref: Ekoi): Ijaw / Izon                                                   | 0.887***<br>[0.401, 1.372]    | 0.122<br>[-0.804, 1.047]      | -0.812***<br>[-1.287, -0.337] | -0.683<br>[-2.054, 0.688]     | -0.133<br>[-0.397, 0.131]     |  | 0.863***<br>[0.377, 1.348]    | -0.786***<br>[-0.803, 1.048]  | 0.122<br>[-1.261, -0.311]     | -0.749<br>[-2.134, 0.636]     | -0.120<br>[-0.383, 0.143]     |  | 0.841***<br>[0.395, 1.287]                        | -0.004<br>[-0.791, 0.783]     | -0.828***<br>[-1.258, -0.397] | -0.583<br>[-1.910, 0.743]     | -0.122<br>[-0.377, 0.133]     |  |
| HH_ETH (ref: Ekoi): Kanuri / Beriberi                                             | 0.996***<br>[0.506, 1.487]    | -0.539<br>[-1.680, 0.602]     | -0.949***<br>[-1.430, -0.469] | -0.503<br>[-1.794, 0.787]     | -0.239<br>[-0.504, 0.026]     |  | 0.961***<br>[0.469, 1.453]    | -0.533<br>[-1.674, 0.609]     | -0.912***<br>[-1.393, -0.430] | -0.591<br>[-1.896, 0.715]     | -0.211<br>[-0.477, 0.054]     |  | 0.869***<br>[0.427, 1.312]                        | -0.450<br>[-1.377, 0.477]     | -0.859***<br>[-1.288, -0.430] | -0.396<br>[-1.636, 0.843]     | -0.241*<br>[-0.492, 0.010]    |  |
| HH_ETH (ref: Ekoi): Tiv                                                           | -0.776***<br>[-1.248, -0.304] | 1.720***<br>[0.838, 2.601]    | 0.133<br>[-0.333, 0.600]      | -0.896<br>[-2.238, 0.445]     | -0.344**<br>[-0.612, -0.075]  |  | -0.809***<br>[-1.281, -0.337] | 1.722***<br>[0.841, 2.604]    | 0.164<br>[-0.303, 0.631]      | -0.968<br>[-2.326, 0.389]     | -0.321**<br>[-0.588, -0.054]  |  | 1.405***<br>[0.657, 2.152]                        | -0.651***<br>[-1.089, -0.213] | 0.111<br>[0.313, 0.535]       | -0.698<br>[-1.982, 0.586]     | -0.290***<br>[-0.541, -0.038] |  |
| HH_ETH (ref: Ekoi): Yoruba                                                        | -0.160<br>[-0.582, 0.261]     | 1.295***<br>[0.459, 2.132]    | -0.418***<br>[-0.827, -0.009] | 2.233***<br>[0.948, 3.518]    | 0.060<br>[-0.175, 0.295]      |  | -0.189<br>[-0.611, 0.233]     | 1.300***<br>[0.463, 2.136]    | -0.388***<br>[-0.797, 0.022]  | 2.177***<br>[0.874, 3.480]    | 0.078<br>[-0.157, 0.313]      |  | 0.960***<br>[0.256, 1.664]                        | -0.374***<br>[-0.748, -0.000] | 2.208***<br>[0.976, 3.439]    | 0.052<br>[-0.177, 0.281]      |                               |  |
| HH_ETH (ref: Ekoi): Other                                                         | 0.206<br>[-0.196, 0.607]      | 0.905**<br>[0.076, 1.734]     | -0.350*<br>[-0.744, 0.044]    | 0.035<br>[-1.215, 1.284]      | -0.018<br>[-0.251, 0.214]     |  | 0.174<br>[-0.229, 0.576]      | 0.909**<br>[0.080, 1.738]     | -0.318<br>[-0.713, 0.077]     | -0.035<br>[-1.303, 1.232]     | 0.005<br>[-0.228, 0.238]      |  | 0.263<br>[-0.110, 0.636]                          | 0.642*<br>[-0.054, 1.338]     | -0.371**<br>[-0.731, -0.011]  | 0.132<br>[-1.070, 1.333]      | -0.006<br>[-0.232, 0.219]     |  |
| HH_SIZ                                                                            | 0.032***<br>[0.023, 0.042]    | -0.017***<br>[-0.032, -0.003] | -0.020***<br>[-0.030, -0.011] | -0.043***<br>[-0.056, -0.030] | -0.006***<br>[-0.010, -0.002] |  | 0.033***<br>[0.023, 0.042]    | -0.017***<br>[-0.032, -0.002] | -0.020***<br>[-0.030, -0.011] | -0.043***<br>[-0.057, -0.030] | -0.006***<br>[-0.010, -0.002] |  | 0.035***<br>[0.027, 0.044]                        | -0.021***<br>[-0.034, -0.008] | -0.023***<br>[-0.031, -0.015] | -0.038***<br>[-0.049, -0.027] | -0.005***<br>[-0.009, -0.002] |  |
| HH_WEA                                                                            | -0.207***<br>[-0.223, -0.190] | 0.120***<br>[0.099, 0.141]    | 0.130***<br>[0.114, 0.145]    | 0.286***<br>[0.256, 0.317]    | 0.058***<br>[0.050, 0.067]    |  | -0.207***<br>[-0.224, -0.190] | 0.120***<br>[0.099, 0.141]    | 0.129***<br>[0.114, 0.145]    | 0.288***<br>[0.258, 0.319]    | 0.059***<br>[0.051, 0.067]    |  | -0.207***<br>[-0.222, -0.193]                     | 0.128***<br>[0.110, 0.147]    | 0.129***<br>[0.116, 0.142]    | 0.261***<br>[0.235, 0.288]    | 0.053***<br>[0.046, 0.060]    |  |
| YEAR (ref: 2003): 2008                                                            | 0.013<br>[-0.168, 0.193]      | -0.240**<br>[-0.450, -0.031]  | 0.079<br>[-0.094, 0.251]      | -0.634***<br>[-1.029, -0.238] | -0.100**<br>[-0.188, -0.013]  |  | 0.146<br>[-0.348, 0.640]      | -0.266<br>[-0.840, 0.309]     | 0.162<br>[-0.312, 0.636]      | -0.459<br>[-1.284, 0.366]     | -0.094<br>[-0.286, 0.098]     |  | 0.035<br>[-0.130, 0.200]                          | -0.236**<br>[-0.434, -0.038]  | 0.064<br>[-0.094, 0.223]      | -0.542***<br>[-0.912, -0.172] | -0.089<br>[-0.180, 0.001]     |  |
| YEAR (ref: 2003): 2013                                                            | -0.025<br>[-0.204, 0.155]     | -0.388***<br>[-0.594, -0.183] | 0.143<br>[-0.027, 0.314]      | -0.258<br>[-0.668, 0.153]     | -0.024<br>[-0.113, 0.065]     |  | 0.263<br>[-0.228, 0.755]      | -0.449<br>[-1.018, 0.121]     | 0.064<br>[-0.405, 0.534]      | 0.186<br>[-0.638, 1.011]      | -0.112<br>[-0.303, 0.078]     |  | -0.021<br>[-0.185, 0.142]                         | -0.355***<br>[-0.549, -0.161] | 0.116<br>[-0.039, 0.272]      | -0.141<br>[-0.528, 0.246]     | -0.001<br>[-0.092, 0.090]     |  |
| YEAR (ref: 2003): 2018                                                            | -0.247***<br>[-0.433, -0.061] | -0.401***<br>[-0.620, -0.182] | 0.354***<br>[0.178, 0.531]    | -1.242***<br>[-1.651, -0.834] | -0.046<br>[-0.139, 0.048]     |  | -0.011<br>[-0.505, 0.482]     | -0.498***<br>[-1.071, 0.074]  | 0.350<br>[-0.122, 0.821]      | -1.370***<br>[-2.184, -0.556] | -0.217***<br>[-0.408, -0.027] |  | -0.412***<br>[-0.443, -0.120]                     | -0.412***<br>[-0.608, -0.216] | 0.379***<br>[0.225, 0.534]    | -0.998***<br>[-1.377, -0.6    |                               |  |



**Table 4b: Robustness check (3-level models): Link between SIA exposure and maternal health service uptake**

| Dependent variables: various indicators of maternal care and child survival (see right) | Main results     |                     |                    |                              |                           |                         |                     |                    |                  |                     | Year-Interaction models |                     |                    |                              |                           | Robustness checks: reporting |  |  |  |  |
|-----------------------------------------------------------------------------------------|------------------|---------------------|--------------------|------------------------------|---------------------------|-------------------------|---------------------|--------------------|------------------|---------------------|-------------------------|---------------------|--------------------|------------------------------|---------------------------|------------------------------|--|--|--|--|
|                                                                                         | Delivery         |                     |                    | Antenatal care               |                           | Year-Interaction models |                     |                    |                  |                     | Delivery                |                     | Antenatal care     |                              |                           |                              |  |  |  |  |
|                                                                                         | At home          | At private facility | At public facility | No. of antenatal care visits | No. of tetanus injections | Delivery                |                     |                    | Antenatal care   |                     | At home                 | At private facility | At public facility | No. of antenatal care visits | No. of tetanus injections |                              |  |  |  |  |
|                                                                                         |                  |                     |                    |                              |                           | At home                 | At private facility | At public facility | At home          | At private facility |                         |                     |                    |                              |                           |                              |  |  |  |  |
| EXP_PREG                                                                                | -0.014           | 0.001               | 0.012              | 0.025                        | 0.012*                    | 0.056                   | 0.035               | 0.014              | 0.076            | -0.020              | -0.018**                | -0.002              | 0.017**            | 0.017                        | 0.008*                    |                              |  |  |  |  |
| EXPxYR<br>[yr = 2008]                                                                   | [-0.036, 0.007]  | [-0.029, 0.030]     | [-0.008, 0.031]    | [-0.012, 0.063]              | [0.003, 0.021]            | [-0.130, 0.243]         | [-0.207, 0.276]     | [-0.169, 0.197]    | [-0.178, 0.330]  | [-0.096, 0.055]     | [-0.035, -0.002]        | [-0.026, 0.023]     | [0.001, 0.032]     | [-0.013, 0.047]              | [-0.000, 0.016]           |                              |  |  |  |  |
| EXPxYR<br>[yr = 2013]                                                                   |                  |                     |                    |                              |                           | [-0.232, 0.145]         | [-0.278, 0.212]     | [-0.221, 0.149]    | [-0.337, 0.209]  | [-0.076, 0.076]     |                         |                     |                    |                              |                           |                              |  |  |  |  |
| EXPxYR<br>[yr = 2018]                                                                   |                  |                     |                    |                              |                           | [-0.087, -0.040]        | [-0.282, 0.203]     | [-0.165, 0.201]    | [-0.388, 0.133]  | [-0.047, 0.107]     |                         |                     |                    |                              |                           |                              |  |  |  |  |
| MOT_ANC                                                                                 | -0.133***        | 0.048***            | 0.063***           | 0.025                        | 0.012*                    | -0.133***               | 0.048***            | 0.063***           | 0.076            | -0.020              | -0.139***               | 0.052***            | 0.064***           | 0.017                        | 0.008*                    |                              |  |  |  |  |
| MOT_EDM                                                                                 | [-0.141, -0.124] | [0.040, 0.056]      | [0.056, 0.069]     |                              |                           | [-0.141, -0.125]        | [0.040, 0.056]      | [0.056, 0.069]     |                  |                     | [-0.147, -0.132]        | [0.045, 0.059]      | [0.058, 0.070]     |                              |                           |                              |  |  |  |  |
| MOT_EDF                                                                                 | -0.062***        | 0.041***            | 0.057***           | 0.091***                     | 0.029**                   | -0.062***               | 0.041***            | 0.057***           | 0.091***         | 0.029**             | -0.063***               | 0.040***            | 0.061***           | 0.090***                     | 0.029**                   |                              |  |  |  |  |
| MOT_AWE                                                                                 | [-0.077, -0.047] | [0.020, 0.061]      | [0.043, 0.071]     | [0.068, 0.113]               | [0.020, 0.038]            | [-0.077, -0.047]        | [0.020, 0.061]      | [0.043, 0.071]     | [0.069, 0.113]   | [0.020, 0.038]      | [-0.076, -0.051]        | [0.021, 0.058]      | [0.049, 0.073]     | [0.070, 0.109]               | [0.021, 0.038]            |                              |  |  |  |  |
| MOT_AGE                                                                                 | -0.029**         | 0.024**             | 0.034**            | 0.081**                      | 0.022**                   | -0.029**                | 0.024**             | 0.034**            | 0.081**          | 0.022**             | -0.026**                | 0.017*              | 0.037**            | 0.075**                      | 0.024**                   |                              |  |  |  |  |
| HH_RUR                                                                                  | [-0.044, -0.014] | [0.003, 0.046]      | [0.020, 0.048]     | [0.062, 0.100]               | [0.013, 0.030]            | [-0.044, -0.014]        | [0.003, 0.045]      | [0.020, 0.048]     | [0.062, 0.100]   | [0.013, 0.030]      | [-0.039, -0.014]        | [-0.003, 0.036]     | [0.025, 0.050]     | [0.054, 0.096]               | [0.017, 0.032]            |                              |  |  |  |  |
| HH_REL (ref. Catholic): Other Christian                                                 | -0.910***        | 0.232***            | 0.972***           | 1.927***                     | 0.633***                  | -0.909***               | 0.232***            | 0.971***           | 1.908***         | 0.628**             | -0.900***               | 0.236**             | 0.948***           | 1.894***                     | 0.637***                  |                              |  |  |  |  |
| HH_REL (ref. Catholic): Islam                                                           | [-0.986, -0.835] | [0.120, 0.344]      | [0.895, 1.049]     | [1.682, 2.172]               | [0.572, 0.694]            | [-0.985, -0.834]        | [0.120, 0.344]      | [0.894, 1.049]     | [1.662, 2.153]   | [0.565, 0.690]      | [-0.966, -0.834]        | [0.136, 0.337]      | [0.882, 1.015]     | [1.665, 2.123]               | [0.586, 0.688]            |                              |  |  |  |  |
| HH_REL (ref. Catholic): Traditionalist                                                  | -0.003           | 0.003               | 0.003              | 0.009**                      | 0.000                     | -0.003                  | 0.003               | 0.003              | 0.009**          | 0.000               | -0.001                  | 0.001               | 0.001              | 0.005*                       | 0.000                     |                              |  |  |  |  |
| HH_REL (ref. Catholic): Other                                                           | [-0.008, 0.002]  | [-0.008, 0.006]     | [-0.002, 0.008]    | [0.003, 0.015]               | [-0.002, 0.002]           | [-0.008, 0.002]         | [-0.008, 0.006]     | [-0.002, 0.008]    | [0.004, 0.015]   | [-0.002, 0.002]     | [-0.005, 0.004]         | [-0.007, 0.005]     | [-0.003, 0.005]    | [-0.000, 0.011]              | [-0.003, 0.002]           |                              |  |  |  |  |
| HH_ETH (ref. Eko): Fulani                                                               | 0.528**          | -0.345***           | -0.335***          | -0.514***                    | -0.142**                  | 0.532**                 | -0.345***           | -0.340**           | -0.510**         | -0.145**            | 0.474**                 | -0.309**            | -0.313**           | -0.511**                     | -0.149**                  |                              |  |  |  |  |
| HH_ETH (ref. Eko): Hausa                                                                | [-0.439, 0.618]  | [-0.453, -0.238]    | [-0.419, -0.251]   | [-0.778, -0.249]             | [-0.205, -0.080]          | [0.442, 0.622]          | [-0.453, -0.237]    | [-0.424, -0.256]   | [-0.776, -0.244] | [-0.209, -0.082]    | [0.395, 0.554]          | [-0.405, -0.213]    | [-0.387, -0.239]   | [-0.730, -0.293]             | [-0.207, -0.091]          |                              |  |  |  |  |
| HH_ETH (ref. Eko): Ibibio                                                               | 0.031            | -0.023              | 0.014              | -0.071                       | -0.031                    | 0.030                   | -0.023              | 0.015              | -0.076           | -0.031              | 0.053                   | -0.085              | 0.055              | -0.116                       | -0.028                    |                              |  |  |  |  |
| HH_ETH (ref. Eko): Igala                                                                | [-0.093, 0.156]  | [-0.145, 0.099]     | [-0.095, 0.124]    | [-0.288, 0.146]              | [-0.084, 0.022]           | [-0.095, 0.154]         | [-0.146, 0.099]     | [-0.094, 0.125]    | [-0.295, 0.143]  | [-0.084, 0.021]     | [-0.059, 0.164]         | [-0.194, 0.023]     | [-0.043, 0.153]    | [-0.336, 0.104]              | [-0.075, 0.019]           |                              |  |  |  |  |
| HH_ETH (ref. Eko): Igbo                                                                 | 0.148*           | -0.079              | -0.021             | -0.042                       | -0.040                    | 0.147*                  | -0.079              | -0.023             | -0.045           | -0.042              | 0.161**                 | -0.129*             | 0.021              | -0.134                       | -0.054                    |                              |  |  |  |  |
| HH_ETH (ref. Eko): Ijaw / Izon                                                          | [-0.006, 0.301]  | [-0.242, 0.084]     | [-0.158, 0.116]    | [-0.433, 0.349]              | [-0.107, 0.027]           | [-0.006, 0.301]         | [-0.242, 0.084]     | [-0.160, 0.114]    | [-0.439, 0.348]  | [-0.109, 0.025]     | [0.024, 0.297]          | [-0.275, 0.018]     | [-0.101, 0.143]    | [-0.491, 0.224]              | [-0.126, 0.019]           |                              |  |  |  |  |
| HH_ETH (ref. Eko): Kanuri / Beriberi                                                    | 0.951***         | -0.902***           | -0.456***          | -0.555***                    | -0.308***                 | 0.951***                | -0.904***           | -0.455***          | -0.567***        | -0.313***           | 0.855***                | -0.852***           | -0.394***          | -0.543***                    | -0.247***                 |                              |  |  |  |  |
| HH_ETH (ref. Eko): Yoruba                                                               | [0.590, 1.312]   | [-1.367, -0.437]    | [-0.819, -0.094]   | [-1.011, -0.098]             | [-0.423, -0.193]          | [0.590, 1.311]          | [-1.369, -0.438]    | [-0.817, -0.093]   | [-1.024, -0.109] | [-0.428, -0.197]    | [0.523, 1.187]          | [-1.284, -0.420]    | [-0.729, -0.059]   | [-1.031, -0.054]             | [-0.375, -0.119]          |                              |  |  |  |  |
| HH_ETH (ref. Eko): Other                                                                | -0.389           | 0.218               | 0.409              | 0.037                        | -0.087                    | 0.220                   | 0.407               | 0.149              | 0.220            | 0.149               | -0.306                  | 0.306               | 0.305              | -0.590                       | -0.231*                   |                              |  |  |  |  |
| HH_ETH (ref. Eko): Tiv                                                                  | [-1.143, 0.365]  | [-1.057, 1.493]     | [-0.350, 1.169]    | [-1.052, 1.125]              | [-0.512, 0.338]           | [-1.143, 0.365]         | [-1.056, 1.496]     | [-0.353, 1.166]    | [-0.923, 1.220]  | [-0.476, 0.350]     | [-0.894, 0.282]         | [-0.687, 1.299]     | [-0.284, 0.893]    | [-1.351, 0.171]              | [-0.486, 0.023]           |                              |  |  |  |  |
| HH_ETH (ref. Eko): Yoruba                                                               | 0.824**          | -0.200              | -0.744**           | -0.608**                     | -0.280**                  | 0.788**                 | -0.205              | -0.704**           | -0.687**         | -0.256**            | 0.841**                 | -0.160              | -0.785**           | -0.576**                     | -0.282**                  |                              |  |  |  |  |
| HH_ETH (ref. Eko): Yoruba                                                               | [0.369, 1.279]   | [-1.163, 0.764]     | [-1.189, -0.300]   | [-1.110, -0.106]             | [-0.405, -0.155]          | [0.332, 1.244]          | [-1.168, 0.759]     | [-1.149, -0.258]   | [-1.223, -0.151] | [-0.388, -0.125]    | [0.426, 1.256]          | [-0.962, 0.642]     | [-1.186, -0.384]   | [-1.075, -0.078]             | [-0.405, -0.158]          |                              |  |  |  |  |
| HH_ETH (ref. Eko): Yoruba                                                               | 0.979**          | -0.399              | -0.748**           | -0.134                       | -0.115**                  | 0.945**                 | -0.403              | -0.708**           | -0.211           | -0.092*             | 0.995**                 | -0.610              | -0.763**           | -0.124                       | -0.124**                  |                              |  |  |  |  |
| HH_ETH (ref. Eko): Yoruba                                                               | [0.532, 1.426]   | [-1.328, 0.531]     | [-1.183, -0.313]   | [-0.634, 0.366]              | [-0.217, -0.013]          | [0.497, 1.393]          | [-1.332, 0.526]     | [-1.144, -0.272]   | [-0.731, 0.310]  | [-0.198, 0.014]     | [0.586, 1.404]          | [-1.393, 0.172]     | [-1.157, -0.369]   | [-0.601, 0.354]              | [-0.231, -0.017]          |                              |  |  |  |  |
| HH_ETH (ref. Eko): Yoruba                                                               | 0.427*           | 0.030               | -0.243             | -0.170                       | -0.099                    | 0.397                   | 0.028               | -0.209             | -0.228           | -0.075              | 0.596**                 | -0.198              | -0.381*            | -0.025                       | -0.135                    |                              |  |  |  |  |
| HH_ETH (ref. Eko): Yoruba                                                               | [-0.063, 0.917]  | [-0.920, 0.980]     | [-0.721, 0.234]    | [-0.746, 0.405]              | [-0.352, 0.153]           | [-0.093, 0.888]         | [-0.922, 0.979]     | [-0.687, 0.269]    | [-0.835, 0.379]  | [-0.327, 0.176]     | [0.144, 1.047]          | [-1.009, 0.612]     | [-0.817, 0.055]    | [-0.417, 0.367]              | [-0.329, 0.058]           |                              |  |  |  |  |
| HH_ETH (ref. Eko): Yoruba                                                               | 0.105            | 0.377               | -0.091             | -0.114                       | 0.288**                   | 0.068                   | 0.373               | -0.048             | -0.199           | 0.312**             | 0.086                   | 0.108               | -0.018             | 0.101                        | 0.304**                   |                              |  |  |  |  |
| HH_ETH (ref. Eko): Yoruba                                                               | [-0.446, 0.657]  | [-0.572, 1.327]     | [-0.604, 0.423]    | [-0.505, 0.278]              | [0.044, 0.532]            | [-0.484, 0.621]         | [-0.577, 1.323]     | [-0.562, 0.465]    | [-0.610, 0.212]  | [0.071, 0.554]      | [-0.411, 0.582]         | [-0.694, 0.909]     | [-0.480, 0.444]    | [-0.276, 0.477]              | [0.033, 0.576]            |                              |  |  |  |  |
| HH_ETH (ref. Eko): Yoruba                                                               | -0.358           | 0.818*              | -0.431*            | 0.755**                      | 0.020                     | -0.388*                 | 0.816*              | -0.395*            | 0.694**          | 0.044               | -0.355*                 | 0.595               | -0.390*            | 0.772**                      | 0.016                     |                              |  |  |  |  |
| HH_ETH (ref. Eko): Yoruba                                                               | [-0.813, 0.097]  | [-0.078, 1.713]     | [-0.862, 0.001]    | [0.284, 1.225]               | [-0.080, 0.120]           | [-0.843, 0.068]         | [-0.080, 1.711]     | [-0.828, 0.037]    | [0.188, 1.199]   | [-0.052, 0.140]     | [-0.774, 0.065]         | [-0.159, 1.350]     | [-0.783, 0.003]    | [0.399, 1.145]               | [-0.077, 0.109]           |                              |  |  |  |  |
| HH_ETH (ref. Eko): Yoruba                                                               | 0.857**          | -0.265              | -0.705**           | -0.772**                     | -0.083                    | 0.829**                 | -0.266              | -0.673**           | -0.839**         | -0.066              | 0.802**                 | -0.416              | -0.684**           | -0.731*                      | -0.080                    |                              |  |  |  |  |
| HH_ETH (ref. Eko): Yoruba                                                               | [0.336, 1.378]   | [-1.253, 0.723]     | [-1.212, -0.199]   | [-1.550, 0.007]              | [-0.259, 0.093]           | [0.308, 1.351]          | [-1.254, 0.722]     | [-1.180, -0.167]   | [-1.640, -0.038] | [-0.248, 0.115]     | [0.329, 1.275]          | [-1.254, 0.422]     | [-1.141, -0.227]   | [-1.484, 0.023]              | [-0.247, 0.087]           |                              |  |  |  |  |
| HH_ETH (ref. Eko): Yoruba                                                               | 1.104**          | -0.411              | -0.925**           | -0.316                       | -0.153**                  | 1.068**                 | -0.413              | -0.882**           | -0.410           | -0.128*             | 0.944**                 | -0.240              | -0.813**           | -0.276                       | -0.169**                  |                              |  |  |  |  |
| HH_ETH (ref. Eko): Yoruba                                                               | [0.593, 1.616]   | [-1.629, 0.808]     | [-1.424, -0.426]   | [-0.771, 0.138]              | [-0.276, -0.030]          | [0.555, 1.581]          | [-1.632, 0.806]     | [-1.382, -0.382]   | [-0.915, 0.095]  | [-0.257, 0.002]     | [0.484, 1.404]          | [-1.230, 0.751]     | [-1.258, -0.367]   | [-0.708, 0.156]              | [-0.286, -0.052]          |                              |  |  |  |  |
| HH_ETH (ref. Eko): Yoruba                                                               | -0.140           | 0.642               | -0.010             | -0.676**                     | -0.421**                  | -0.173                  | 0.639               | 0.025              | -0.750**         | -0.399**            | -0.082                  | 0.460               | -0.040             | -0.570**                     | -0.358**                  |                              |  |  |  |  |
| HH_ETH (ref. Eko): Yoruba                                                               | [-0.647, 0.367]  | [-0.304, 1.588]     | [-0.511, 0.491]    | [-1.181, -0.171]             | [-0.581, -0.260]          | [-0.681, 0.334]         | [-0.307, 1.586]     | [-0.477, 0.526]    | [-1.281, -0.219] | [-0.564, -0.234]    | [-0.549, 0.384]         | [-0.343, 1.262]     | [-0.493, 0.413]    | [-1.059, -0.080]             | [-0.492, -0.224]          |                              |  |  |  |  |
| HH_ETH (ref. Eko): Yoruba                                                               | 0.331            | 0.348               | -0.448**           | 1.415**                      | 0.097*                    | 0.298                   | 0.346               | -0.411*            | 1.348**          | 0.120**             | 0.327                   | 0.103               | -0.394*            | 1.495**                      | 0.082                     |                              |  |  |  |  |
| HH_ETH (ref. Eko): Yoruba                                                               | [-0.123, 0.784]  | [-0.551, 1.247]     | [-0.883, -0.013]   | [0.906, 1.924]               | [-0.018, 0.212]           | [-0.157, 0.752]         | [-0.553, 1.245]     | [-0.847, 0.025]    | [0.827, 1.869]   | [0.007, 0.232]      | [-0.091, 0.745]         | [-0.654, 0.860]     | [-0.790, 0.003]    | [0.975, 2.014]               | [-0.029, 0.192]           |                              |  |  |  |  |
| HH_ETH (ref. Eko): Yoruba                                                               | 0.424*           | 0.273               | -0.350*            | 0.085                        | 0.029                     | 0.390*                  | 0.271               | -0.312             | 0.011            | 0.053               | 0.434**                 | 0.077               | -0.349*            | 0.138                        | 0.032                     |                              |  |  |  |  |
| HH_ETH (ref. Eko): Yoruba                                                               | [-0.000, 0.849]  | [-0.614, 1.161]     | [-0.765, 0.064]    | [-0.250, 0.421]              | [-0.053, 0.111]           | [-0.036, 0.816]         | [-0.617, 1.159]     | [-0.727, 0.103]    | [-0.370, 0.392]  | [-0.032, 0.138]     | [0.042, 0.826]          | [-0.670, 0.823]     | [-0.726, 0.028]    | [-0.170, 0.445]              | [-0.041, 0.105]           |                              |  |  |  |  |
| HH_SIZ                                                                                  | 0.033**          | -0.013*             | -0.022**           | -0.038**                     | -0.006**                  | 0.033**                 | -0.013*             | -0.022**           | -0.039**         | -0.006**            | 0.036**                 | -0.018**            | -0.024**           | -0.035**                     | -0.005**                  |                              |  |  |  |  |
| HH_SIZ                                                                                  | [0.023, 0.043]   | [-0.028, 0.001]     | [-0.031, -0.013]   | [-0.054, -0.023]             | [-0.010, -0.002]          | [0.023, 0.043]          | [-0.028, 0.001]     | [-0.031, -0.012]   | [-0.054, -0.023] | [-0.010, -0.002]    | [0.027, 0.044]          | [-0.031, -0.005]    | [-0.032, -0.016]   | [-0.046, -0.023]             | [-0.009, -0.001]          |                              |  |  |  |  |
| HH_SIZ                                                                                  | -0.210**         | 0.120**             | 0.133**            | 0.278**                      | 0.057**                   | -0.210**                | 0.120**             | 0.132**            | 0.280**          | 0.057**             | -0.211**                | 0.129**             | 0.132**            | 0.256**                      | 0.051**                   |                              |  |  |  |  |
| HH_SIZ                                                                                  | [-0.227, -0.193] | [0.099, 0.141]      | [0.117, 0.148]     | [0.241, 0.314]               | [0.047, 0.066]            | [-0.227, -0.193]        | [0.099, 0.141]      | [0.117, 0.148]     | [0.243, 0.317]   | [0.048, 0.067]      | [-0.225, -0.196]        | [0.110, 0.147]      | [0.119, 0.145]     | [0.220, 0.291]               | [0.044, 0.059]            |                              |  |  |  |  |
| YEAR (ref. 2003): 2008                                                                  | 0.064            | -0.308***           | 0.077              | -0.715***                    | -0.110**                  | 0.153                   | -0.2                |                    |                  |                     |                         |                     |                    |                              |                           |                              |  |  |  |  |

**Table 5a: Detailed results: Link between SIA exposure and child survival**

| Dependent variable: Child survival               | Main results                  |                               |                                 |
|--------------------------------------------------|-------------------------------|-------------------------------|---------------------------------|
|                                                  | Full model                    |                               | Year-Interaction                |
|                                                  | Exposure decomposition        | Total exposure                | Child survival (total exposure) |
| EXP_PREG_nod<br>(date approximation)             | -0.012<br>[-0.034, 0.010]     |                               |                                 |
| EXP_CHI_nod<br>(date approximation)              | -0.019***<br>[-0.029, -0.009] |                               |                                 |
| EXP_TOT_nod (total exposure, date approximation) |                               | -0.018***<br>[-0.027, -0.009] | -0.058<br>[-0.134, 0.019]       |
| EXPxYR<br>[yr = 2008]                            |                               |                               | 0.031<br>[-0.044, 0.107]        |
| EXPxYR<br>[yr = 2013]                            |                               |                               | 0.046<br>[-0.030, 0.121]        |
| EXPxYR<br>[yr = 2018]                            |                               |                               | 0.031<br>[-0.045, 0.106]        |
| CHI_AGE                                          | -0.005<br>[-0.014, 0.005]     | -0.005<br>[-0.014, 0.005]     | -0.002<br>[-0.012, 0.008]       |
| CHI_AGE2                                         | 0.000<br>[-0.000, 0.000]      | 0.000<br>[-0.000, 0.000]      | 0.000<br>[-0.000, 0.000]        |
| CHI_ORD                                          | -0.154***<br>[-0.176, -0.131] | -0.154***<br>[-0.176, -0.131] | -0.153***<br>[-0.176, -0.131]   |
| CHI_SEX                                          | 0.213***<br>[0.141, 0.285]    | 0.213***<br>[0.141, 0.285]    | 0.213***<br>[0.141, 0.285]      |
| MOT_ANC                                          | -0.001<br>[-0.011, 0.009]     | -0.001<br>[-0.011, 0.009]     | -0.001<br>[-0.011, 0.009]       |
| MOT_EDM                                          | 0.013<br>[-0.006, 0.032]      | 0.013<br>[-0.006, 0.032]      | 0.013<br>[-0.006, 0.032]        |
| MOT_EDF                                          | 0.028***<br>[0.011, 0.045]    | 0.028***<br>[0.011, 0.045]    | 0.028***<br>[0.010, 0.045]      |
| MOT_AGE                                          | 0.010**<br>[0.002, 0.018]     | 0.010**<br>[0.002, 0.018]     | 0.010**<br>[0.001, 0.018]       |
| HH_RUR                                           | -0.182***<br>[-0.284, -0.079] | -0.181***<br>[-0.284, -0.079] | -0.184***<br>[-0.286, -0.081]   |
| HH_REL (ref: Catholic): Other Christian          | -0.137<br>[-0.303, 0.028]     | -0.138<br>[-0.303, 0.028]     | -0.136<br>[-0.302, 0.029]       |
| HH_REL (ref: Catholic): Islam                    | -0.072<br>[-0.267, 0.123]     | -0.070<br>[-0.265, 0.124]     | -0.065<br>[-0.260, 0.130]       |
| HH_REL (ref: Catholic): Traditionalist           | -0.092<br>[-0.464, 0.280]     | -0.091<br>[-0.463, 0.281]     | -0.099<br>[-0.471, 0.273]       |
| HH_REL (ref: Catholic): Other                    | 0.584<br>[-0.590, 1.757]      | 0.581<br>[-0.592, 1.755]      | 0.558<br>[-0.616, 1.732]        |
| HH_ETH (ref: Ekoi): Fulani                       | -0.182<br>[-0.808, 0.444]     | -0.178<br>[-0.803, 0.448]     | -0.118<br>[-0.745, 0.510]       |
| HH_ETH (ref: Ekoi): Hausa                        | -0.502<br>[-1.120, 0.116]     | -0.497<br>[-1.114, 0.121]     | -0.436<br>[-1.056, 0.183]       |
| HH_ETH (ref: Ekoi): Ibibio                       | -0.457<br>[-1.138, 0.225]     | -0.458<br>[-1.140, 0.223]     | -0.422<br>[-1.104, 0.259]       |
| HH_ETH (ref: Ekoi): Igala                        | -0.390<br>[-1.102, 0.322]     | -0.389<br>[-1.101, 0.323]     | -0.357<br>[-1.070, 0.355]       |
| HH_ETH (ref: Ekoi): Igbo                         | -0.500<br>[-1.109, 0.109]     | -0.501<br>[-1.110, 0.108]     | -0.471<br>[-1.081, 0.139]       |
| HH_ETH (ref: Ekoi): Ijaw / Izon                  | -0.242<br>[-0.896, 0.413]     | -0.243<br>[-0.898, 0.412]     | -0.204<br>[-0.859, 0.451]       |
| HH_ETH (ref: Ekoi): Kanuri / Beriberi            | -0.269<br>[-0.928, 0.389]     | -0.264<br>[-0.922, 0.395]     | -0.189<br>[-0.850, 0.472]       |
| HH_ETH (ref: Ekoi): Tiv                          | -0.362<br>[-1.013, 0.290]     | -0.359<br>[-1.010, 0.293]     | -0.312<br>[-0.964, 0.341]       |
| HH_ETH (ref: Ekoi): Yoruba                       | -0.021<br>[-0.642, 0.601]     | -0.021<br>[-0.643, 0.600]     | 0.011<br>[-0.611, 0.633]        |
| HH_ETH (ref: Ekoi): Other                        | -0.354<br>[-0.959, 0.251]     | -0.351<br>[-0.956, 0.254]     | -0.298<br>[-0.905, 0.308]       |
| HH_SIZ                                           | 0.132***<br>[0.117, 0.146]    | 0.132***<br>[0.117, 0.146]    | 0.132***<br>[0.118, 0.146]      |
| HH_WEA                                           | 0.017*<br>[-0.003, 0.037]     | 0.017<br>[-0.003, 0.037]      | 0.016<br>[-0.004, 0.036]        |
| YEAR (ref: 2003): 2008                           | 0.330***<br>[0.136, 0.524]    | 0.334***<br>[0.141, 0.528]    | 0.208<br>[-0.263, 0.680]        |
| YEAR (ref: 2003): 2013                           | 0.489***<br>[0.290, 0.689]    | 0.493***<br>[0.295, 0.692]    | 0.161<br>[-0.308, 0.629]        |
| YEAR (ref: 2003): 2018                           | 0.302***<br>[0.110, 0.494]    | 0.309***<br>[0.119, 0.500]    | 0.164<br>[-0.304, 0.633]        |
| Constant                                         | 2.494***<br>[1.819, 3.169]    | 2.502***<br>[1.827, 3.177]    | 2.644***<br>[1.859, 3.428]      |
| Multilevel variance parameter: Level 1           | 0.041***<br>[0.014, 0.068]    | 0.041***<br>[0.014, 0.068]    | 0.040***<br>[0.013, 0.067]      |
| Level 1 Observations (child)                     | 52431                         | 52431                         | 52431                           |
| Level 2 Observations (LGA)                       | 689                           | 689                           | 689                             |
| Akaike Information Criterion                     | 23684.534                     | 23682.853                     | 23676.199                       |
| Prob. > $\chi^2$                                 | <0.001                        | <0.001                        | <0.001                          |

---

95% confidence intervals in brackets

\*  $p < 0.10$ , \*\*  $p < 0.05$ , \*\*\*  $p < 0.01$

**Table 5b: Robustness check (3-level models): Link between SIA exposure and child survival**

| Dependent variables: various indicators of maternal care and child survival (see right) | Main results                  |                               |                                 |
|-----------------------------------------------------------------------------------------|-------------------------------|-------------------------------|---------------------------------|
|                                                                                         | Full model                    |                               | Year-Interaction                |
|                                                                                         | Exposure decomposition        | Total exposure                | Child survival (total exposure) |
| EXP_PREG_nod (date approximation)                                                       | -0.013<br>[-0.035, 0.010]     |                               |                                 |
| EXP_CHI_nod (date approximation)                                                        | -0.020***<br>[-0.031, -0.010] |                               |                                 |
| EXP_TOT_nod (total exposure, date approximation)                                        |                               | -0.019***<br>[-0.029, -0.009] | -0.062<br>[-0.140, 0.015]       |
| EXPxYR [yr = 2008]                                                                      |                               |                               | 0.033<br>[-0.042, 0.109]        |
| EXPxYR [yr = 2013]                                                                      |                               |                               | 0.048<br>[-0.027, 0.124]        |
| EXPxYR [yr = 2018]                                                                      |                               |                               | 0.034<br>[-0.042, 0.110]        |
| CHI_AGE                                                                                 | -0.004<br>[-0.014, 0.006]     | -0.004<br>[-0.013, 0.006]     | -0.001<br>[-0.011, 0.009]       |
| CHI_AGE2                                                                                | 0.000<br>[-0.000, 0.000]      | 0.000<br>[-0.000, 0.000]      | 0.000<br>[-0.000, 0.000]        |
| CHI_ORD                                                                                 | -0.154***<br>[-0.177, -0.132] | -0.154***<br>[-0.177, -0.132] | -0.154***<br>[-0.176, -0.131]   |
| CHI_SEX                                                                                 | 0.212***<br>[0.140, 0.284]    | 0.212***<br>[0.140, 0.284]    | 0.212***<br>[0.140, 0.284]      |
| MOT_ANC                                                                                 | 0.000<br>[-0.010, 0.010]      | 0.000<br>[-0.010, 0.010]      | 0.000<br>[-0.010, 0.010]        |
| MOT_EDM                                                                                 | 0.014<br>[-0.005, 0.033]      | 0.014<br>[-0.005, 0.033]      | 0.014<br>[-0.005, 0.033]        |
| MOT_EDF                                                                                 | 0.029***<br>[0.012, 0.046]    | 0.029***<br>[0.012, 0.046]    | 0.029***<br>[0.012, 0.046]      |
| MOT_AGE                                                                                 | 0.010**<br>[0.002, 0.019]     | 0.010**<br>[0.002, 0.019]     | 0.010**<br>[0.002, 0.019]       |
| HH_RUR                                                                                  | -0.176***<br>[-0.279, -0.073] | -0.176***<br>[-0.279, -0.073] | -0.178***<br>[-0.281, -0.075]   |
| HH_REL (ref: Catholic): Other Christian                                                 | -0.128<br>[-0.296, 0.039]     | -0.129<br>[-0.296, 0.038]     | -0.127<br>[-0.295, 0.040]       |
| HH_REL (ref: Catholic): Islam                                                           | -0.089<br>[-0.288, 0.109]     | -0.088<br>[-0.286, 0.110]     | -0.083<br>[-0.282, 0.115]       |
| HH_REL (ref: Catholic): Traditionalist                                                  | -0.055<br>[-0.428, 0.319]     | -0.054<br>[-0.428, 0.320]     | -0.060<br>[-0.434, 0.314]       |
| HH_REL (ref: Catholic): Other                                                           | 0.639<br>[-0.535, 1.813]      | 0.636<br>[-0.538, 1.809]      | 0.613<br>[-0.561, 1.788]        |
| HH_ETH (ref: Ekoi): Fulani                                                              | -0.001<br>[-0.665, 0.663]     | 0.003<br>[-0.662, 0.667]      | 0.071<br>[-0.595, 0.737]        |
| HH_ETH (ref: Ekoi): Hausa                                                               | -0.349<br>[-1.006, 0.308]     | -0.345<br>[-1.002, 0.312]     | -0.276<br>[-0.935, 0.384]       |
| HH_ETH (ref: Ekoi): Ibibio                                                              | -0.347<br>[-1.064, 0.370]     | -0.349<br>[-1.066, 0.368]     | -0.304<br>[-1.022, 0.415]       |
| HH_ETH (ref: Ekoi): Igala                                                               | -0.203<br>[-0.969, 0.563]     | -0.202<br>[-0.968, 0.564]     | -0.153<br>[-0.921, 0.614]       |
| HH_ETH (ref: Ekoi): Igbo                                                                | -0.353<br>[-1.010, 0.305]     | -0.355<br>[-1.012, 0.303]     | -0.316<br>[-0.975, 0.342]       |
| HH_ETH (ref: Ekoi): Ijaw / Izon                                                         | -0.056<br>[-0.773, 0.660]     | -0.058<br>[-0.775, 0.658]     | -0.011<br>[-0.728, 0.707]       |
| HH_ETH (ref: Ekoi): Kanuri / Beriberi                                                   | -0.230<br>[-0.925, 0.464]     | -0.225<br>[-0.920, 0.469]     | -0.146<br>[-0.843, 0.551]       |
| HH_ETH (ref: Ekoi): Tiv                                                                 | -0.200<br>[-0.911, 0.511]     | -0.198<br>[-0.909, 0.513]     | -0.142<br>[-0.855, 0.571]       |
| HH_ETH (ref: Ekoi): Yoruba                                                              | 0.047<br>[-0.616, 0.709]      | 0.046<br>[-0.617, 0.709]      | 0.087<br>[-0.577, 0.751]        |
| HH_ETH (ref: Ekoi): Other                                                               | -0.217<br>[-0.861, 0.426]     | -0.215<br>[-0.859, 0.428]     | -0.153<br>[-0.798, 0.493]       |
| HH_SIZ                                                                                  | 0.132***<br>[0.118, 0.146]    | 0.132***<br>[0.118, 0.146]    | 0.133***<br>[0.118, 0.147]      |
| HH_WEA                                                                                  | 0.014<br>[-0.006, 0.035]      | 0.014<br>[-0.006, 0.034]      | 0.014<br>[-0.007, 0.034]        |
| YEAR (ref: 2003): 2008                                                                  | 0.326***<br>[0.133, 0.519]    | 0.331***<br>[0.139, 0.523]    | 0.204<br>[-0.266, 0.674]        |
| YEAR (ref: 2003): 2013                                                                  | 0.495***<br>[0.295, 0.694]    | 0.500***<br>[0.301, 0.699]    | 0.155<br>[-0.312, 0.623]        |
| YEAR (ref: 2003): 2018                                                                  | 0.297***<br>[0.106, 0.488]    | 0.305***<br>[0.115, 0.494]    | 0.142<br>[-0.326, 0.611]        |
| Constant                                                                                | 2.353***<br>[1.641, 3.065]    | 2.362***<br>[1.650, 3.074]    | 2.505***<br>[1.689, 3.322]      |
| Multilevel variance parameter: Level 1                                                  | 0.026**<br>[0.005, 0.047]     | 0.026**<br>[0.005, 0.047]     | 0.027**<br>[0.005, 0.048]       |
| Multilevel variance parameter: Level 2                                                  | 0.020*<br>[-0.004, 0.044]     | 0.020<br>[-0.004, 0.044]      | 0.019<br>[-0.005, 0.042]        |
| Level 1 Observations (child)                                                            | 52431                         | 52431                         | 52431                           |
| Level 2 Observations (LGA)                                                              | 761                           | 761                           | 761                             |
| Level 3 Observations (state)                                                            | 37                            | 37                            | 37                              |
| Akaike Information Criterion                                                            | 23665.091                     | 23663.461                     | 23656.424                       |
| Prob. > $\chi^2$                                                                        | <0.001                        | <0.001                        | <0.001                          |

95% confidence intervals in brackets

\* p &lt; 0.10, \*\* p &lt; 0.05, \*\*\* p &lt; 0.01

**Table 6a: Additional robustness checks: exclusion of 2018 survey round to compensate for mop-up variability**

| <i>Dependent variables: various indicators of routine immunisation, maternal care and child survival (see right)</i> | <b>Non-polio full immunisation status</b> |                              | <b>Delivery</b>              |                              |                              | <b>Antenatal care</b>        |                              | <b>Child survival</b>        |
|----------------------------------------------------------------------------------------------------------------------|-------------------------------------------|------------------------------|------------------------------|------------------------------|------------------------------|------------------------------|------------------------------|------------------------------|
|                                                                                                                      | Full model                                | Interaction model            | At home                      | At private facility          | At public facility           | No. of antenatal care        | No. of tetanus injections    | Total exposure               |
| EXP_CHI                                                                                                              | -0.030***<br>[-0.044,-0.016]              | 0.011<br>[-0.015,0.036]      |                              |                              |                              |                              |                              |                              |
| EXPxAGE                                                                                                              |                                           | -0.001***<br>[-0.001,-0.000] |                              |                              |                              |                              |                              |                              |
| EXP_PREG                                                                                                             |                                           |                              | 0.006<br>[-0.020,0.032]      | -0.057***<br>[-0.091,-0.024] | 0.004<br>[-0.020,0.029]      | -0.020<br>[-0.060,0.021]     | -0.003<br>[-0.014,0.007]     |                              |
| EXP_TOT_nod (total exposure, date approximation)                                                                     |                                           |                              |                              |                              |                              |                              |                              | -0.013**<br>[-0.024,-0.001]  |
| CHI_AGE                                                                                                              | 0.033***<br>[0.026,0.039]                 | 0.038***<br>[0.031,0.045]    |                              |                              |                              |                              |                              | -0.002<br>[-0.014,0.009]     |
| CHI_AGE2                                                                                                             |                                           |                              |                              |                              |                              |                              |                              | 0.000<br>[-0.000,0.000]      |
| CHI_ORD                                                                                                              | -0.060***<br>[-0.088,-0.033]              | -0.061***<br>[-0.088,-0.034] |                              |                              |                              |                              |                              | -0.143***<br>[-0.170,-0.116] |
| CHI_SEX                                                                                                              | -0.007<br>[-0.090,0.077]                  | -0.006<br>[-0.089,0.078]     |                              |                              |                              |                              |                              | 0.245***<br>[0.157,0.334]    |
| MOT_ANC                                                                                                              | 0.053***<br>[0.043,0.062]                 | 0.053***<br>[0.044,0.062]    | -0.133***<br>[-0.142,-0.125] | 0.056***<br>[0.047,0.064]    | 0.061***<br>[0.054,0.068]    |                              |                              | 0.002<br>[-0.010,0.013]      |
| MOT_EDM                                                                                                              | 0.069***<br>[0.049,0.089]                 | 0.069***<br>[0.049,0.089]    | -0.064***<br>[-0.081,-0.048] | 0.057***<br>[0.035,0.080]    | 0.053***<br>[0.038,0.069]    | 0.105***<br>[0.079,0.130]    | 0.031***<br>[0.024,0.038]    | 0.018<br>[-0.006,0.041]      |
| MOT_EDF                                                                                                              | 0.006<br>[-0.014,0.027]                   | 0.007<br>[-0.013,0.028]      | -0.028***<br>[-0.045,-0.012] | 0.036***<br>[0.012,0.059]    | 0.031***<br>[0.015,0.047]    | 0.090***<br>[0.068,0.112]    | 0.022***<br>[0.015,0.029]    | 0.024**<br>[0.002,0.045]     |
| MOT_AWE                                                                                                              | 2.955***<br>[2.821,3.089]                 | 2.964***<br>[2.829,3.098]    | -0.947***<br>[-1.029,-0.865] | 0.289***<br>[0.166,0.411]    | 1.021***<br>[0.936,1.106]    | 1.900***<br>[1.754,2.047]    | 0.631***<br>[0.584,0.677]    |                              |
| MOT_AGE                                                                                                              | 0.025***<br>[0.016,0.035]                 | 0.026***<br>[0.016,0.035]    | -0.002<br>[-0.007,0.004]     | 0.001<br>[-0.007,0.008]      | 0.002<br>[-0.003,0.007]      | 0.014***<br>[0.007,0.020]    | 0.002<br>[-0.000,0.004]      | 0.010**<br>[0.000,0.020]     |
| HH_RUR                                                                                                               | -0.074<br>[-0.191,0.044]                  | -0.076<br>[-0.194,0.042]     | 0.599***<br>[0.498,0.701]    | -0.402***<br>[-0.526,-0.278] | -0.364***<br>[-0.458,-0.270] | -0.568***<br>[-0.836,-0.301] | -0.168***<br>[-0.226,-0.111] | -0.266***<br>[-0.395,-0.137] |
| HH_REL (ref: Catholic): Other Christian                                                                              | -0.172**<br>[-0.329,-0.015]               | -0.172**<br>[-0.330,-0.015]  | 0.106<br>[-0.029,0.242]      | -0.042<br>[-0.180,0.096]     | -0.050<br>[-0.172,0.071]     | -0.102<br>[-0.348,0.144]     | -0.037<br>[-0.096,0.022]     | -0.050<br>[-0.245,0.144]     |
| HH_REL (ref: Catholic): Islam                                                                                        | -0.504***<br>[-0.695,-0.313]              | -0.522***<br>[-0.714,-0.330] | 0.205**<br>[0.040,0.369]     | -0.218**<br>[-0.397,-0.040]  | -0.035<br>[-0.184,0.113]     | -0.177<br>[-0.508,0.154]     | -0.109***<br>[-0.189,-0.029] | 0.025<br>[-0.204,0.254]      |
| HH_REL (ref: Catholic): Traditionalist                                                                               | -0.596***<br>[-1.025,-0.168]              | -0.600***<br>[-1.029,-0.171] | 1.053***<br>[0.680,1.426]    | -0.863***<br>[-1.347,-0.380] | -0.553***<br>[-0.936,-0.171] | -0.589**<br>[-1.087,-0.091]  | -0.360***<br>[-0.498,-0.221] | -0.069<br>[-0.457,0.318]     |
| HH_REL (ref: Catholic): Other                                                                                        | -0.733<br>[-2.533,1.067]                  | -0.725<br>[-2.524,1.075]     | -0.555<br>[-1.634,0.523]     | 0.570<br>[-0.794,1.933]      | 0.388<br>[-0.744,1.520]      | 0.096<br>[-2.104,2.295]      | 0.022<br>[-0.697,0.741]      | -0.324<br>[-1.551,0.903]     |
| HH_ETH (ref: Ekoi): Fulani                                                                                           | -1.040***<br>[-1.596,-0.484]              | -1.092***<br>[-1.650,-0.535] | 0.671***<br>[0.201,1.141]    | -0.058<br>[-1.098,0.981]     | -0.744***<br>[-1.207,-0.280] | -0.764<br>[-2.268,0.740]     | -0.383***<br>[-0.655,-0.110] | -0.447<br>[-1.256,0.362]     |
| HH_ETH (ref: Ekoi): Hausa                                                                                            | -0.926***<br>[-1.459,-0.393]              | -1.012***<br>[-1.547,-0.477] | 0.936***<br>[0.481,1.391]    | -0.569<br>[-1.557,0.419]     | -0.806***<br>[-1.254,-0.357] | -0.504<br>[-2.005,0.996]     | -0.293**<br>[-0.563,-0.023]  | -0.832**<br>[-1.632,-0.032]  |
| HH_ETH (ref: Ekoi): Ibibio                                                                                           | -0.639**<br>[-1.224,-0.054]               | -0.643**<br>[-1.229,-0.057]  | 0.296<br>[-0.220,0.811]      | 0.750<br>[-0.270,1.771]      | -0.263<br>[-0.767,0.242]     | -0.026<br>[-1.484,1.433]     | -0.163<br>[-0.483,0.156]     | -0.777*<br>[-1.650,0.095]    |
| HH_ETH (ref: Ekoi): Igala                                                                                            | -0.699**<br>[-1.337,-0.061]               | -0.704**<br>[-1.342,-0.065]  | -0.532*<br>[-1.106,0.043]    | 1.440***<br>[0.423,2.456]    | 0.023<br>[-0.509,0.556]      | -0.135<br>[-1.689,1.418]     | 0.284*<br>[-0.046,0.615]     | -0.670<br>[-1.584,0.243]     |
| HH_ETH (ref: Ekoi): Igbo                                                                                             | -0.542**<br>[-1.050,-0.035]               | -0.546**<br>[-1.054,-0.037]  | -0.852***<br>[-1.301,-0.403] | 2.114***<br>[1.165,3.064]    | -0.601***<br>[-1.039,-0.162] | 1.096<br>[-0.409,2.602]      | 0.078<br>[-0.184,0.340]      | -0.917**<br>[-1.704,-0.130]  |
| HH_ETH (ref: Ekoi): Ijaw / Izon                                                                                      | -0.654**<br>[-1.242,-0.066]               | -0.651**<br>[-1.240,-0.061]  | 0.819***<br>[0.289,1.350]    | 0.238<br>[-0.817,1.292]      | -0.751***<br>[-1.271,-0.231] | -0.915<br>[-2.502,0.672]     | -0.150<br>[-0.444,0.145]     | -0.766*<br>[-1.592,0.059]    |
| HH_ETH (ref: Ekoi): Kanuri / Beriberi                                                                                | -1.146***<br>[-1.819,-0.474]              | -1.232***<br>[-1.906,-0.557] | 1.027***<br>[0.493,1.560]    | -0.564<br>[-1.886,0.759]     | -0.954***<br>[-1.477,-0.431] | -0.626<br>[-2.148,0.897]     | -0.286*<br>[-0.579,0.007]    | -0.628<br>[-1.471,0.215]     |
|                                                                                                                      | -0.721**<br>[-1.819,-0.474]               | -0.734**<br>[-1.906,-0.557]  | -0.803***<br>[0.493,1.560]   | 1.933***<br>[-1.886,0.759]   | 0.111<br>[-1.477,-0.431]     | -1.066<br>[-2.148,0.897]     | -0.392**<br>[-0.579,0.007]   | -0.883**<br>[-1.471,0.215]   |

|                                            |                 |                 |                 |                 |                 |                           |                           |                 |
|--------------------------------------------|-----------------|-----------------|-----------------|-----------------|-----------------|---------------------------|---------------------------|-----------------|
| HH_ETH (ref: Ekoi): Tiv                    | [-1.334,-0.108] | [-1.347,-0.120] | [-1.314,-0.292] | [0.928,2.937]   | [-0.398,0.621]  | [-2.636,0.504]            | [-0.696,-0.088]           | [-1.710,-0.056] |
|                                            | -0.650**        | -0.660**        | -0.172          | 1.441***        | -0.422*         | 2.185***                  | 0.061                     | -0.429          |
| HH_ETH (ref: Ekoi): Yoruba                 | [-1.168,-0.132] | [-1.179,-0.141] | [-0.628,0.283]  | [0.485,2.397]   | [-0.866,0.022]  | [0.668,3.702]             | [-0.204,0.327]            | [-1.231,0.372]  |
|                                            | -0.727***       | -0.759***       | 0.196           | 1.015**         | -0.322          | -0.039                    | -0.054                    | -0.723*         |
| HH_ETH (ref: Ekoi): Other                  | [-1.226,-0.228] | [-1.260,-0.259] | [-0.238,0.630]  | [0.066,1.963]   | [-0.750,0.105]  | [-1.520,1.442]            | [-0.317,0.209]            | [-1.506,0.060]  |
|                                            | -0.015**        | -0.015**        | 0.030***        | -0.013          | -0.019***       | -0.049***                 | -0.008***                 | 0.135***        |
| HH_SIZ                                     | [-0.029,-0.001] | [-0.029,-0.001] | [0.019,0.041]   | [-0.029,0.003]  | [-0.030,-0.009] | [-0.064,-0.035]           | [-0.013,-0.004]           | [0.117,0.153]   |
|                                            | 0.155***        | 0.156***        | -0.213***       | 0.116***        | 0.138***        | 0.318***                  | 0.066***                  | 0.012           |
| HH_WEA                                     | [0.133,0.178]   | [0.133,0.179]   | [-0.232,-0.194] | [0.092,0.140]   | [0.120,0.155]   | [0.282,0.353]             | [0.057,0.076]             | [-0.013,0.038]  |
|                                            | 0.667***        | 0.601***        | 0.001           | -0.246**        | 0.081           | -0.658***                 | -0.098**                  | 0.320***        |
| YEAR (ref: 2003): 2008                     | [0.402,0.932]   | [0.333,0.869]   | [-0.185,0.188]  | [-0.462,-0.031] | [-0.097,0.259]  | [-1.073,-0.242]           | [-0.184,-0.013]           | [0.123,0.517]   |
|                                            | 0.801***        | 0.720***        | -0.030          | -0.406***       | 0.146           | -0.338                    | -0.036                    | 0.464***        |
| YEAR (ref: 2003): 2013                     | [0.539,1.064]   | [0.453,0.986]   | [-0.216,0.156]  | [-0.618,-0.194] | [-0.030,0.322]  | [-0.769,0.094]            | [-0.123,0.052]            | [0.258,0.670]   |
|                                            | -4.617***       | -4.787***       | 2.050***        | -3.869***       | -2.399***       | 3.518***                  | 1.007***                  | 2.723***        |
| Constant                                   | [-5.246,-3.989] | [-5.423,-4.151] | [1.540,2.561]   | [-4.878,-2.861] | [-2.900,-1.897] | [1.918,5.118]             | [0.716,1.299]             | [1.871,3.576]   |
|                                            | 0.349***        | 0.348***        | 0.478***        | 0.789***        | 0.499***        | 0.793***                  | -1.384***                 | 0.041**         |
| Multilevel variance parameter:<br>Level 1  | [0.265,0.434]   | [0.264,0.432]   | [0.381,0.576]   | [0.603,0.975]   | [0.407,0.590]   | [0.696,0.890]             | [-1.483,-1.285]           | [0.007,0.075]   |
| Multilevel variance parameter:<br>Residual |                 |                 |                 |                 |                 | 1.333***<br>[1.291,1.376] | 0.092***<br>[0.064,0.121] |                 |
| Level 1 Observations (child)               | 20752           | 20752           | 29480           | 29480           | 29480           | 29691                     | 31177                     | 34500           |
| Level 2 Observations (LGA)                 | 572             | 572             | 574             | 574             | 574             | 574                       | 575                       | 576             |
| Akaike Information Criterion               | 14663.935       | 14651.865       | 21880.73        | 14443.993       | 24935.19        | 164998.875                | 94979.021                 | 15648.893       |
| Prob. > $\chi^2$                           | <0.001          | <0.001          | <0.001          | <0.001          | <0.001          | <0.001                    | <0.001                    | <0.001          |

95% confidence intervals in brackets

\* p &lt; 0.10, \*\* p &lt; 0.05, \*\*\* p &lt; 0.01

**Table 6b-1: Additional robustness checks: year-wise stratification to detect time trends - Polio**

| Dependent variable: non-polio full immunisation status | Full model                   |                              |                              |                              | Interaction model (EXPxAGE)   |                              |                              |                              |
|--------------------------------------------------------|------------------------------|------------------------------|------------------------------|------------------------------|-------------------------------|------------------------------|------------------------------|------------------------------|
|                                                        | 2003                         | 2008                         | 2013                         | 2018                         | 2003                          | 2008                         | 2013                         | 2018                         |
| EXP_CHI                                                | -0.040<br>[-0.289,0.209]     | -0.051***<br>[-0.079,-0.023] | -0.026***<br>[-0.043,-0.010] | -0.027<br>[-0.065,0.010]     | -0.086<br>[-1.046,0.874]      | -0.042<br>[-0.093,0.009]     | 0.027*<br>[-0.003,0.058]     | 0.111*<br>[-0.012,0.233]     |
| EXPxAGE                                                |                              |                              |                              |                              | 0.003<br>[-0.051,0.057]       | 0.000<br>[-0.001,0.001]      | -0.001***<br>[-0.002,-0.001] | -0.005**<br>[-0.009,-0.001]  |
| CHI_AGE                                                | 0.117**<br>[0.017,0.218]     | 0.035***<br>[0.025,0.046]    | 0.035***<br>[0.026,0.043]    | 0.036***<br>[0.016,0.056]    | 0.109<br>[-0.087,0.305]       | 0.036***<br>[0.024,0.049]    | 0.043***<br>[0.033,0.052]    | 0.042***<br>[0.021,0.062]    |
| CHI_ORD                                                | 0.018<br>[-0.153,0.188]      | -0.037*<br>[-0.080,0.007]    | -0.076***<br>[-0.113,-0.039] | -0.069**<br>[-0.129,-0.008]  | 0.018<br>[-0.153,0.188]       | -0.037*<br>[-0.081,0.006]    | -0.076***<br>[-0.113,-0.039] | -0.070**<br>[-0.131,-0.009]  |
| CHI_SEX                                                | 0.031<br>[-0.464,0.526]      | 0.010<br>[-0.126,0.145]      | -0.027<br>[-0.137,0.083]     | 0.030<br>[-0.146,0.206]      | 0.031<br>[-0.464,0.526]       | 0.010<br>[-0.126,0.145]      | -0.025<br>[-0.135,0.085]     | 0.029<br>[-0.147,0.205]      |
| MOT_ANC                                                | 0.095***<br>[0.045,0.144]    | 0.061***<br>[0.045,0.077]    | 0.044***<br>[0.032,0.056]    | 0.074***<br>[0.049,0.100]    | 0.094***<br>[0.044,0.144]     | 0.061***<br>[0.045,0.077]    | 0.045***<br>[0.032,0.057]    | 0.075***<br>[0.050,0.101]    |
| MOT_EDM                                                | 0.074<br>[-0.036,0.185]      | 0.064***<br>[0.031,0.096]    | 0.075***<br>[0.048,0.101]    | 0.041*<br>[-0.003,0.085]     | 0.074<br>[-0.036,0.185]       | 0.064***<br>[0.031,0.096]    | 0.076***<br>[0.049,0.103]    | 0.044*<br>[-0.000,0.088]     |
| MOT_EDF                                                | -0.035<br>[-0.159,0.088]     | 0.026<br>[-0.007,0.059]      | -0.009<br>[-0.037,0.018]     | 0.028<br>[-0.015,0.071]      | -0.035<br>[-0.159,0.088]      | 0.026<br>[-0.007,0.059]      | -0.007<br>[-0.035,0.020]     | 0.029<br>[-0.014,0.072]      |
| MOT_AWE                                                | 2.968***<br>[1.880,4.056]    | 2.453***<br>[2.255,2.650]    | 3.411***<br>[3.217,3.605]    | 3.131***<br>[2.779,3.484]    | 2.971***<br>[1.881,4.061]     | 2.455***<br>[2.257,2.652]    | 3.422***<br>[3.228,3.615]    | 3.132***<br>[2.779,3.484]    |
| MOT_AGE                                                | 0.012<br>[-0.046,0.070]      | 0.021***<br>[0.006,0.037]    | 0.027***<br>[0.014,0.040]    | 0.033***<br>[0.012,0.054]    | 0.012<br>[-0.046,0.070]       | 0.021***<br>[0.006,0.037]    | 0.027***<br>[0.015,0.040]    | 0.034***<br>[0.013,0.055]    |
| HH_RUR                                                 | -0.056<br>[-0.680,0.569]     | -0.031<br>[-0.244,0.181]     | -0.168**<br>[-0.321,-0.015]  | -0.232*<br>[-0.467,0.002]    | -0.054<br>[-0.680,0.571]      | -0.030<br>[-0.243,0.182]     | -0.176**<br>[-0.329,-0.022]  | -0.235**<br>[-0.469,-0.001]  |
| HH_REL (ref: Catholic): Other Christian                | -0.189<br>[-0.895,0.517]     | -0.269**<br>[-0.532,-0.007]  | -0.099<br>[-0.310,0.112]     | 0.011<br>[-0.320,0.342]      | -0.188<br>[-0.894,0.518]      | -0.270**<br>[-0.532,-0.007]  | -0.099<br>[-0.311,0.112]     | 0.018<br>[-0.313,0.349]      |
| HH_REL (ref: Catholic): Islam                          | -0.258<br>[-1.035,0.519]     | -0.540***<br>[-0.864,-0.216] | -0.474***<br>[-0.729,-0.218] | -0.432**<br>[-0.848,-0.015]  | -0.257<br>[-1.034,0.520]      | -0.543***<br>[-0.868,-0.219] | -0.504***<br>[-0.760,-0.248] | -0.438**<br>[-0.854,-0.022]  |
| HH_REL (ref: Catholic): Traditionalist                 | -0.325<br>[-2.215,1.565]     | -0.481<br>[-1.089,0.126]     | -0.757**<br>[-1.411,-0.104]  | -0.168<br>[-1.807,1.470]     | -0.322<br>[-2.212,1.568]      | -0.481<br>[-1.089,0.127]     | -0.774**<br>[-1.428,-0.119]  | -0.105<br>[-1.755,1.545]     |
| HH_REL (ref: Catholic): Other                          | 0.000<br>[0.000,0.000]       | -0.531<br>[-2.432,1.370]     | 0.000<br>[0.000,0.000]       | 0.162<br>[-1.319,1.642]      | 0.000<br>[0.000,0.000]        | -0.526<br>[-2.428,1.377]     | 0.000<br>[0.000,0.000]       | 0.191<br>[-1.290,1.671]      |
| HH_ETH (ref: Ekoi): Fulani                             | 0.000<br>[0.000,0.000]       | -1.277***<br>[-2.032,-0.522] | 0.058<br>[-1.523,1.640]      | -0.712<br>[-2.074,0.650]     | 0.000<br>[0.000,0.000]        | -1.289***<br>[-2.046,-0.531] | 0.034<br>[-1.549,1.617]      | -0.771<br>[-2.133,0.591]     |
| HH_ETH (ref: Ekoi): Hausa                              | -0.297<br>[-2.094,1.500]     | -1.227***<br>[-1.956,-0.498] | 0.249<br>[-1.314,1.812]      | -0.635<br>[-1.952,0.682]     | -0.287<br>[-2.098,1.524]      | -1.245***<br>[-1.978,-0.511] | 0.170<br>[-1.395,1.734]      | -0.691<br>[-2.008,0.626]     |
| HH_ETH (ref: Ekoi): Ibibio                             | 0.000<br>[0.000,0.000]       | -0.898**<br>[-1.695,-0.101]  | 0.426<br>[-1.174,2.027]      | -0.712<br>[-2.124,0.700]     | 0.000<br>[0.000,0.000]        | -0.899**<br>[-1.697,-0.101]  | 0.469<br>[-1.134,2.071]      | -0.721<br>[-2.133,0.690]     |
| HH_ETH (ref: Ekoi): Igala                              | -0.403<br>[-2.844,2.038]     | -1.279***<br>[-2.159,-0.399] | 0.926<br>[-0.719,2.571]      | -1.062<br>[-2.652,0.528]     | -0.399<br>[-2.844,2.046]      | -1.284***<br>[-2.165,-0.404] | 0.987<br>[-0.660,2.633]      | -1.073<br>[-2.664,0.519]     |
| HH_ETH (ref: Ekoi): Igbo                               | 0.510<br>[-1.416,2.435]      | -0.827**<br>[-1.481,-0.173]  | 0.569<br>[-0.981,2.120]      | -0.415<br>[-1.695,0.865]     | 0.512<br>[-1.418,2.442]       | -0.828**<br>[-1.482,-0.174]  | 0.611<br>[-0.941,2.164]      | -0.433<br>[-1.712,0.847]     |
| HH_ETH (ref: Ekoi): Ijaw / Izon                        | 0.219<br>[-2.879,3.317]      | -1.426***<br>[-2.240,-0.611] | 0.894<br>[-0.696,2.484]      | 0.126<br>[-1.326,1.578]      | 0.212<br>[-2.892,3.316]       | -1.425***<br>[-2.239,-0.610] | 0.943<br>[-0.649,2.535]      | 0.110<br>[-1.342,1.562]      |
| HH_ETH (ref: Ekoi): Kanuri / Beriberi                  | 0.000<br>[0.000,0.000]       | -1.606***<br>[-2.589,-0.624] | 0.072<br>[-1.584,1.727]      | -0.521<br>[-2.060,1.018]     | 0.000<br>[0.000,0.000]        | -1.622***<br>[-2.607,-0.636] | -0.019<br>[-1.677,1.640]     | -0.615<br>[-2.154,0.925]     |
| HH_ETH (ref: Ekoi): Tiv                                | 0.636<br>[-1.631,2.903]      | -0.966**<br>[-1.777,-0.155]  | 0.299<br>[-1.325,1.924]      | -0.453<br>[-1.861,0.955]     | 0.640<br>[-1.632,2.912]       | -0.972**<br>[-1.784,-0.161]  | 0.347<br>[-1.280,1.973]      | -0.511<br>[-1.920,0.897]     |
| HH_ETH (ref: Ekoi): Yoruba                             | 1.185<br>[-0.686,3.055]      | -0.572*<br>[-1.252,0.108]    | 0.193<br>[-1.360,1.746]      | -0.550<br>[-1.852,0.753]     | 1.185<br>[-0.689,3.060]       | -0.576*<br>[-1.256,0.105]    | 0.228<br>[-1.327,1.783]      | -0.566<br>[-1.868,0.736]     |
| HH_ETH (ref: Ekoi): Other                              | 0.094<br>[-1.703,1.892]      | -0.999***<br>[-1.651,-0.347] | 0.430<br>[-1.113,1.973]      | -0.390<br>[-1.670,0.890]     | 0.098<br>[-1.705,1.902]       | -1.008***<br>[-1.661,-0.354] | 0.438<br>[-1.107,1.982]      | -0.448<br>[-1.728,0.832]     |
| HH_SIZ                                                 | 0.005<br>[-0.080,0.090]      | -0.026**<br>[-0.049,-0.004]  | -0.009<br>[-0.027,0.010]     | -0.012<br>[-0.043,0.019]     | 0.005<br>[-0.080,0.090]       | -0.026**<br>[-0.049,-0.004]  | -0.008<br>[-0.027,0.011]     | -0.012<br>[-0.043,0.018]     |
| HH_WEA                                                 | 0.083<br>[-0.035,0.201]      | 0.170***<br>[0.130,0.209]    | 0.156***<br>[0.127,0.185]    | 0.099***<br>[0.056,0.142]    | 0.083<br>[-0.035,0.201]       | 0.170***<br>[0.131,0.209]    | 0.157***<br>[0.127,0.186]    | 0.101***<br>[0.058,0.145]    |
| Constant                                               | -7.031***<br>[-9.848,-4.214] | -3.237***<br>[-4.034,-2.439] | -5.320***<br>[-6.931,-3.709] | -4.308***<br>[-5.802,-2.814] | -6.896***<br>[-10.781,-3.011] | -3.286***<br>[-4.117,-2.454] | -5.704***<br>[-7.327,-4.081] | -4.474***<br>[-5.974,-2.973] |
| Multilevel variance parameter: Level 1                 | 0.000<br>[-0.000,0.000]      | 0.520***<br>[0.347,0.692]    | 0.295***<br>[0.198,0.392]    | 0.398***<br>[0.200,0.596]    | 0.000<br>[-0.000,0.000]       | 0.520***<br>[0.347,0.692]    | 0.292***<br>[0.196,0.389]    | 0.396***<br>[0.198,0.593]    |
| Level 1 Observations (child)                           | 648                          | 8163                         | 11924                        | 3629                         | 648                           | 8163                         | 11924                        | 3629                         |
| Level 2 Observations (LGA)                             | 138                          | 369                          | 370                          | 504                          | 138                           | 369                          | 370                          | 504                          |
| Akaike Information Criterion                           | 450.792                      | 5772.355                     | 8366.43                      | 3393.899                     | 452.782                       | 5774.188                     | 8351.201                     | 3390.504                     |
| Prob. > $\chi^2$                                       | <0.001                       | <0.001                       | <0.001                       | <0.001                       | <0.001                        | <0.001                       | <0.001                       | <0.001                       |

95% confidence intervals in brackets

\* p &lt; 0.10, \*\* p &lt; 0.05, \*\*\* p &lt; 0.01

**Table 6b-2: Additional robustness checks: year-wise stratification to detect time trends - delivery**

| <i>Dependent variables: various indicators of delivery (see right)</i> | At home   |           |           |           | At private facility |           |           |           | At public facility |           |           |           |
|------------------------------------------------------------------------|-----------|-----------|-----------|-----------|---------------------|-----------|-----------|-----------|--------------------|-----------|-----------|-----------|
|                                                                        | 2003      | 2008      | 2013      | 2018      | 2003                | 2008      | 2013      | 2018      | 2003               | 2008      | 2013      | 2018      |
| EXP_PREG                                                               | 0.104     | 0.004     | 0.019     | 0.023     | -0.138              | -0.065**  | -0.060*** | -0.108*** | 0.038              | 0.005     | -0.005    | 0.014     |
| MOT_ANC                                                                | -0.112*** | -0.155*** | -0.124*** | -0.179*** | 0.029*              | 0.083***  | 0.049***  | 0.069***  | 0.071***           | 0.070***  | 0.054***  | 0.071***  |
| MOT_EDM                                                                | -0.129*** | -0.056*** | -0.061*** | -0.085*** | 0.076*              | 0.057***  | 0.056***  | 0.047*    | 0.102***           | 0.041***  | 0.055***  | 0.088***  |
| MOT_EDF                                                                | -0.012    | -0.039*** | -0.023**  | -0.041**  | 0.029               | 0.027     | 0.046***  | 0.028     | 0.009              | 0.043***  | 0.024**   | 0.051***  |
| MOT_AWE                                                                | -0.746*** | -0.934*** | -0.982*** | -0.765*** | 0.229               | 0.327***  | 0.259**   | 0.238     | 0.848***           | 0.990***  | 1.075***  | 0.809***  |
| MOT_AGE                                                                | -0.013    | -0.001    | -0.001    | -0.006    | -0.005              | 0.002     | -0.001    | 0.002     | 0.018              | 0.000     | 0.003     | 0.005     |
| HH_RUR                                                                 | 0.476**   | 0.641***  | 0.709***  | 0.450***  | -0.086              | -0.329*** | -0.592*** | -0.431*** | -0.526**           | -0.436*** | -0.356*** | -0.241**  |
| HH_REL (ref: Catholic): Other Christian                                | -0.228    | 0.055     | 0.199**   | 0.176     | 0.514**             | 0.266**   | -0.283*** | -0.391*** | -0.370             | -0.278**  | 0.090     | 0.203     |
| HH_REL (ref: Catholic): Islam                                          | 0.347     | -0.047    | 0.411***  | 0.416**   | 0.171               | 0.270*    | -0.558*** | -0.348*   | -0.467*            | -0.191    | 0.066     | -0.052    |
| HH_REL (ref: Catholic): Traditionalist                                 | 2.659**   | 1.275**   | 0.673**   | 0.535     | 0.000               | -0.624*   | -0.779**  | -1.217    | -1.795             | -1.044*** | -0.099    | 0.332     |
| HH_REL (ref: Catholic): Other                                          | 0.000     | -1.175    | 0.003     | -0.456    | 0.000               | 1.580**   | 0.000     | 0.000     | 0.000              | 0.330     | 0.489     | 1.074*    |
| HH_ETH (ref: Ekoi): Fulani                                             | 0.000     | 1.075**   | 0.369     | 0.357     | 0.000               | -0.040    | -0.898    | -0.153    | 0.000              | -1.106*** | -0.403    | -0.625    |
| HH_ETH (ref: Ekoi): Hausa                                              | 0.924**   | 1.371***  | 0.590     | 0.759     | -1.297              | -1.110*   | -0.953    | -0.675    | -0.617             | -1.075*** | -0.514    | -0.770    |
| HH_ETH (ref: Ekoi): Ibibio                                             | -0.948    | 0.178     | 0.484     | 0.610     | 0.744               | 0.846     | -0.114    | -0.010    | 1.351              | -0.198    | -0.248    | -0.492    |
| HH_ETH (ref: Ekoi): Igala                                              | -1.208    | -0.841*   | -0.481    | -0.705    | 1.997**             | 1.364**   | 0.878     | 1.585*    | 0.324              | 0.288     | -0.001    | -0.234    |
| HH_ETH (ref: Ekoi): Igbo                                               | -0.910*   | -1.046*** | -0.853    | -0.730    | 2.503***            | 2.415***  | 1.396     | 1.515*    | -0.728             | -0.660**  | -0.459    | -0.554    |
| HH_ETH (ref: Ekoi): Ijaw / Izon                                        | 0.012     | 0.996**   | 0.881     | 1.401**   | 0.257               | 0.102     | -0.448    | -0.270    | 0.377              | -0.640    | -0.825    | -1.319**  |
| HH_ETH (ref: Ekoi): Kanuri / Beriberi                                  | 0.656     | 1.330***  | 0.663     | 0.511     | 0.000               | -0.880    | -0.741    | -0.448    | 0.131              | -1.285*** | -0.555    | -0.644    |
| HH_ETH (ref: Ekoi): Tiv                                                | -1.588**  | -0.853**  | -0.951    | -1.013*   | 2.493**             | 2.198**   | 1.302     | 1.892**   | -0.041             | -0.025    | 0.358     | 0.062     |
| HH_ETH (ref: Ekoi): Yoruba                                             | -0.659    | -0.370    | -0.137    | -0.332    | 1.967***            | 1.501**   | 0.855     | 1.004     | -0.462             | -0.288    | -0.408    | -0.334    |
| HH_ETH (ref: Ekoi): Other                                              | -0.001    | 0.307     | 0.015     | -0.015    | 1.369**             | 0.946     | 0.373     | 0.781     | -0.441             | -0.414    | -0.089    | -0.337    |
| HH_SIZ                                                                 | 0.030     | 0.022**   | 0.038**   | 0.044**   | -0.043              | -0.006    | -0.021*   | -0.035*   | 0.003              | -0.014    | -0.026**  | -0.021*   |
| HH_WEA                                                                 | -0.247*** | -0.264*** | -0.186*** | -0.183*** | 0.177***            | 0.143***  | 0.106***  | 0.150***  | 0.082**            | 0.174***  | 0.118***  | 0.086***  |
| Constant                                                               | 2.344***  | 2.386***  | 1.702**   | 1.973***  | -3.864***           | -4.914*** | -3.104*** | -3.415*** | -2.637***          | -2.205*** | -2.397*** | -2.225*** |
| Multilevel variance parameter: Level 1                                 | 0.733***  | 0.652***  | 0.490***  | 0.619***  | 0.439*              | 1.004***  | 0.814***  | 0.606***  | 0.846***           | 0.761***  | 0.473***  | 0.639***  |
| Level 1 Observations (child)                                           | 1395      | 11609     | 16475     | 5233      | 1346                | 11609     | 16467     | 5211      | 1395               | 11609     | 16475     | 5233      |
| Level 2 Observations (LGA)                                             | 153       | 370       | 370       | 510       | 153                 | 370       | 370       | 510       | 153                | 370       | 370       | 510       |
| Akaike Information Criterion                                           | 1147.831  | 7880.9    | 12731.565 | 4519.37   | 901.306             | 5217.905  | 8321.506  | 3169.365  | 1222.345           | 8804.345  | 14843.344 | 5370.273  |
| Prob. > $\chi^2$                                                       | <0.001    | <0.001    | <0.001    | <0.001    | <0.001              | <0.001    | <0.001    | <0.001    | <0.001             | <0.001    | <0.001    | <0.001    |

95% confidence intervals in brackets

\* p &lt; 0.10, \*\* p &lt; 0.05, \*\*\* p &lt; 0.01



**Table 6b-3: Additional robustness checks: year-wise stratification to detect time trends: antenatal care and child survival**

| Dependent variables: various indicators of maternal care and child survival (see right) | Antenatal care               |           |           |           |                           |           |           |           | Child survival |           |           |           |
|-----------------------------------------------------------------------------------------|------------------------------|-----------|-----------|-----------|---------------------------|-----------|-----------|-----------|----------------|-----------|-----------|-----------|
|                                                                                         | No. of antenatal care visits |           |           |           | No. of tetanus injections |           |           |           | Total exposure |           |           |           |
|                                                                                         | 2003                         | 2008      | 2013      | 2018      | 2003                      | 2008      | 2013      | 2018      | 2003           | 2008      | 2013      | 2018      |
| EXP_PREG                                                                                | 0.015                        | -0.051    | -0.024    | -0.054*** | 0.014                     | -0.012    | -0.005    | 0.006     |                |           |           |           |
| EXP_TOT_nod (total exposure, date approximation)                                        |                              |           |           |           |                           |           |           |           | -0.087         | -0.038*** | -0.006    | -0.037*** |
| CHI_AGE                                                                                 |                              |           |           |           |                           |           |           |           | -0.122*        | 0.007     | 0.001     | -0.003    |
| CHI_AGE2                                                                                |                              |           |           |           |                           |           |           |           | 0.005*         | 0.000     | 0.000     | 0.000*    |
| CHI_ORD                                                                                 |                              |           |           |           |                           |           |           |           | -0.159***      | -0.142*** | -0.138*** | -0.171*** |
| CHI_SEX                                                                                 |                              |           |           |           |                           |           |           |           | 0.182          | 0.283***  | 0.224***  | 0.151**   |
| MOT_ANC                                                                                 |                              |           |           |           |                           |           |           |           | 0.043*         | -0.009    | 0.006     | -0.005    |
| MOT_EDM                                                                                 | 0.122**                      | 0.123***  | 0.088***  | 0.074***  | 0.047***                  | 0.033***  | 0.028***  | 0.035***  | 0.066          | 0.007     | 0.023     | 0.003     |
| MOT_EDF                                                                                 | 0.094                        | 0.075***  | 0.093***  | 0.025     | 0.010                     | 0.020***  | 0.026***  | 0.023***  | 0.092**        | 0.035**   | 0.003     | 0.035**   |
| MOT_AWE                                                                                 | 2.141***                     | 1.721***  | 1.955***  | 1.553***  | 0.750***                  | 0.582***  | 0.640***  | 0.576***  |                |           |           |           |
| MOT_AGE                                                                                 | 0.035**                      | 0.005     | 0.016***  | 0.006     | 0.007                     | 0.002     | 0.001     | -0.005**  | 0.041*         | 0.013*    | 0.003     | 0.007     |
| HH_RUR                                                                                  | -0.486                       | -0.456*   | -0.726*** | -0.717*** | -0.115                    | -0.199*** | -0.171*** | -0.117*** | -0.067         | -0.236**  | -0.365*** | -0.049    |
| HH_REL (ref: Catholic): Other Christian                                                 | 0.320                        | -0.156    | -0.057    | 0.309     | 0.197                     | -0.051    | -0.049    | -0.085    | 0.083          | 0.041     | -0.247    | -0.412**  |
| HH_REL (ref: Catholic): Islam                                                           | 0.058                        | -0.153    | -0.203    | -0.025    | 0.004                     | -0.135**  | -0.125**  | -0.083    | 0.682**        | 0.195     | -0.303*   | -0.369*   |
| HH_REL (ref: Catholic): Traditionalist                                                  | -1.539***                    | -0.418    | -0.582    | -1.368**  | 0.075                     | -0.440*** | -0.357*** | -0.213    | -0.160         | -0.059    | -0.187    | 1.121     |
| HH_REL (ref: Catholic): Other                                                           | -4.444***                    | 1.812     | -1.774*** | 0.433     | -0.814***                 | 0.288     | -0.541    | -0.017    | 0.000          | -0.835    | 0.000     | 0.000     |
| HH_ETH (ref: Ekoi): Fulani                                                              | 0.000                        | -0.658    | 0.567     | -0.490    | 0.000                     | -0.541*** | -0.336**  | -0.281**  | 0.000          | -0.356    | 0.302*    | 0.472     |
| HH_ETH (ref: Ekoi): Hausa                                                               | 0.074                        | -0.617    | 1.027     | 0.037     | 0.062                     | -0.539*** | -0.179**  | -0.164    | -0.577         | -0.598    | -0.163    | 0.263     |
| HH_ETH (ref: Ekoi): Ibibio                                                              | 1.244                        | 1.024     | 0.716     | 0.064     | 0.364                     | -0.255    | -0.199    | 0.119     | -2.494***      | -0.137    | -0.204    | 0.185     |
| HH_ETH (ref: Ekoi): Igala                                                               | 3.934***                     | 0.215     | 0.941     | 0.854     | 2.076***                  | 0.024     | 0.189     | 0.193     | -1.161         | -0.713    | 0.528     | 0.114     |
| HH_ETH (ref: Ekoi): Igbo                                                                | 2.564***                     | 1.493**   | 2.530*    | 2.459***  | 0.657***                  | -0.077    | 0.103     | 0.301***  | -0.783         | -0.654    | -0.409*** | 0.289     |
| HH_ETH (ref: Ekoi): Ijaw / Izon                                                         | 1.149                        | -0.127    | 0.263     | -0.052    | 0.201                     | -0.184    | -0.198*   | -0.183    | -1.101         | -0.575    | -0.179    | 1.357**   |
| HH_ETH (ref: Ekoi): Kanuri / Beriberi                                                   | 1.003**                      | -0.914    | 1.163     | -0.290    | 0.223                     | -0.534*** | -0.157    | -0.234    | -0.102         | -0.529    | 0.231     | 0.571     |
| HH_ETH (ref: Ekoi): Tiv                                                                 | -0.068                       | -0.978    | 0.077     | 0.280     | 0.326                     | -0.565*** | -0.375**  | -0.197    | -0.327         | -0.847*   | -0.142    | 0.856     |
| HH_ETH (ref: Ekoi): Yoruba                                                              | 5.942***                     | 2.849***  | 3.553**   | 3.056***  | 0.767***                  | -0.071    | 0.049     | -0.027    | -1.234*        | -0.103    | 0.168     | 0.808     |
| HH_ETH (ref: Ekoi): Other                                                               | 1.491***                     | 0.149     | 1.326     | 0.679     | 0.556***                  | -0.211    | -0.040    | 0.059     | -0.829*        | -0.570    | 0.000     | 0.466     |
| HH_SIZ                                                                                  | -0.070**                     | -0.031*** | -0.066*** | -0.036**  | -0.009                    | -0.003    | -0.014*** | -0.001    | 0.059*         | 0.134***  | 0.153***  | 0.133***  |
| HH_WEA                                                                                  | 0.348**                      | 0.356**   | 0.297**   | 0.221**   | 0.076**                   | 0.073**   | 0.063**   | 0.037**   | 0.109**        | -0.018    | 0.018     | 0.015     |
| Constant                                                                                | 0.814                        | 2.695***  | 2.145     | 2.444***  | 0.054                     | 1.125***  | 1.010***  | 1.074***  | 2.191***       | 2.852***  | 2.839***  | 2.454***  |
| Multilevel variance parameter: Level 1                                                  | 0.446**                      | 0.674**   | 0.881**   | 0.382**   | -1.847***                 | -1.260*** | -1.339*** | -1.244*** | 0.269          | 0.035     | 0.079**   | 0.066**   |
| Multilevel variance parameter: Residual                                                 | 1.395***                     | 1.270***  | 1.350***  | 1.173***  | 0.126**                   | 0.041*    | 0.114**   | 0.036*    |                |           |           |           |
| Level 1 Observations (child)                                                            | 1400                         | 11781     | 16510     | 5328      | 1437                      | 12654     | 17086     | 5408      | 1921           | 14275     | 18276     | 17857     |
| Level 2 Observations (LGA)                                                              | 153                          | 370       | 370       | 511       | 154                       | 370       | 370       | 512       | 158            | 370       | 370       | 515       |
| Akaike Information Criterion                                                            | 8042.517                     | 64196.451 | 92468.14  | 28199.742 | 4511.606                  | 37408.855 | 52854.597 | 16072.681 | 1014.205       | 6786.461  | 7863.049  | 8003.619  |
| Prob. > $\chi^2$                                                                        | <0.001                       | <0.001    | <0.001    | <0.001    | <0.001                    | <0.001    | <0.001    | <0.001    | <0.001         | <0.001    | <0.001    | <0.001    |

95% confidence intervals in brackets

\* p &lt; 0.10, \*\* p &lt; 0.05, \*\*\* p &lt; 0.01

Table 6c: Additional robustness checks: exclusion of measles vaccine from full immunisation outcome

| Dependent variable: non-polio-measles full immunisation status | Full model (by region) |                             |               |            |            |            |             |            | Interaction model (EXPxAGE) (by region) |            |            |            |             |            |
|----------------------------------------------------------------|------------------------|-----------------------------|---------------|------------|------------|------------|-------------|------------|-----------------------------------------|------------|------------|------------|-------------|------------|
|                                                                | Full model             | Interaction model (EXPxAGE) | North Central | North East | North West | South East | South South | South West | North Central                           | North East | North West | South East | South South | South West |
| EXP_CHI                                                        | -0.020***              | -0.032***                   | 0.028         | -0.061***  | -0.045     | 0.051      | -0.019      | -0.064     | 0.025                                   | -0.065***  | -0.041     | 0.057      | -0.063      | -0.085     |
| EXPxAGE                                                        |                        | 0.000                       |               |            |            |            |             |            | 0.000                                   | 0.000      | 0.000      | -0.001     | 0.001       | 0.000      |
| CHI_AGE                                                        | 0.026***               | 0.016***                    | 0.009         | 0.049**    | 0.051      | 0.022      | 0.008       | 0.041**    | -0.003                                  | 0.034***   | 0.033      | 0.007      | 0.011       | 0.032***   |
| CHI_AGE2                                                       | 0.000                  |                             | 0.000         | 0.000      | 0.000      | 0.000      | 0.000       | 0.000      |                                         |            |            |            |             |            |
| CHI_ORD                                                        | -0.046***              | -0.046***                   | -0.018        | -0.081***  | -0.038     | 0.003      | -0.071**    | -0.056     | -0.018                                  | -0.082***  | -0.038     | 0.004      | -0.071**    | -0.056     |
| CHI_SEX                                                        | -0.006                 | -0.006                      | -0.050        | -0.038     | 0.048      | -0.026     | 0.158       | -0.073     | -0.048                                  | -0.039     | 0.045      | -0.026     | 0.158       | -0.072     |
| MOT_ANC                                                        | 0.061***               | 0.061***                    | 0.100***      | 0.135***   | 0.070***   | 0.027*     | 0.044***    | 0.041***   | 0.100***                                | 0.135***   | 0.071***   | 0.027*     | 0.044***    | 0.041***   |
| MOT_EDM                                                        | 0.056***               | 0.056***                    | 0.054***      | 0.049***   | 0.073***   | 0.073***   | 0.046**     | 0.044**    | 0.054***                                | 0.049***   | 0.073***   | 0.046**    | 0.044**     | 0.044**    |
| MOT_EDF                                                        | 0.024***               | 0.024***                    | 0.035***      | 0.014      | 0.044**    | 0.014      | 0.024       | -0.033     | 0.035***                                | 0.014      | 0.044**    | 0.013      | 0.024       | -0.034     |
| MOT_AWE                                                        | 3.124***               | 3.121***                    | 2.731***      | 2.920***   | 3.684***   | 3.059***   | 2.965***    | 3.248***   | 2.730***                                | 2.920***   | 3.683***   | 3.053***   | 2.964***    | 3.240***   |
| MOT_AGE                                                        | 0.021***               | 0.021***                    | 0.011         | 0.031***   | 0.033***   | 0.016      | 0.023**     | 0.015      | 0.011                                   | 0.031***   | 0.033***   | 0.015      | 0.023**     | 0.015      |
| HH_RUR                                                         | -0.150***              | -0.150***                   | -0.045        | -0.214     | -0.172     | -0.073     | -0.037      | -0.377***  | -0.044                                  | -0.214     | -0.173     | -0.072     | -0.036      | -0.376***  |
| HH_REL (ref: Catholic): Other Christian                        | -0.187***              | -0.188***                   | -0.111        | -0.611**   | 0.389      | -0.263*    | -0.345**    | -0.132     | -0.112                                  | -0.616**   | 0.387      | -0.261*    | -0.350*     | -0.132     |
| HH_REL (ref: Catholic): Islam                                  | -0.575***              | -0.571***                   | -0.448***     | -1.070***  | -0.348     | -0.342     | -0.101      | -0.464     | -0.446***                               | -1.080***  | -0.348     | -0.336     | -0.103      | -0.463     |
| HH_REL (ref: Catholic): Traditionalist                         | -0.757***              | -0.756***                   | -0.964***     | -1.116**   | -0.812     | -0.562     | -0.866**    | -0.025     | -0.953**                                | -1.136**   | -0.789     | -0.557     | -0.872**    | -0.044     |
| HH_REL (ref: Catholic): Other                                  | -0.098                 | -0.106                      | -0.138        | 0.000      | 0.000      | 0.000      | -0.301      | 0.447      | -0.137                                  | 0.000      | 0.000      | 0.000      | -0.306      | 0.436      |
| HH_ETH (ref: Ekoi): Fulani                                     | -0.847***              | -0.833***                   | -0.261        | -0.138     | 0.316      | 0.000      | 0.000       | -0.881     | -0.252                                  | -0.142     | 0.319      | 0.000      | 0.000       | -0.863     |
| HH_ETH (ref: Ekoi): Hausa                                      | -0.804***              | -0.784***                   | -0.461**      | -0.137     | 0.410      | -0.677     | -0.163      | -0.110     | -0.459**                                | -0.137     | 0.412      | -0.660     | -0.164      | -0.113     |
| HH_ETH (ref: Ekoi): Ibibio                                     | -0.582***              | -0.582**                    | -1.077        | 0.000      | 0.000      | -0.764     | -0.963**    | 0.727      | -1.082                                  | 0.000      | 0.000      | -0.748     | -0.960**    | 0.734      |
| HH_ETH (ref: Ekoi): Igala                                      | -0.733***              | -0.731**                    | -0.423*       | 0.000      | 0.000      | -1.131     | -1.242      | 1.297      | -0.428**                                | 0.000      | 0.000      | -1.134     | -1.257      | 1.306      |
| HH_ETH (ref: Ekoi): Igbo                                       | -0.031                 | -0.031                      | -0.312        | 0.195      | 0.011      | -0.421     | -0.199      | 0.848***   | -0.305                                  | 0.206      | 0.013      | -0.411     | -0.198      | 0.850***   |
| HH_ETH (ref: Ekoi): Ijaw / Izon                                | -0.418                 | -0.419                      | 0.000         | 0.000      | 0.000      | -0.772***  | -1.020      | 0.000      | 0.000                                   | 0.000      | 0.000      | 0.000      | -0.767***   | -1.030     |
| HH_ETH (ref: Ekoi): Kanuri / Beriberi                          | -0.940***              | -0.915***                   | -0.903        | -0.278     | 0.270      | 0.000      | 2.526*      | -0.891     | -0.272                                  | 0.279      | 0.000      | 0.000      | 2.558*      | 0.000      |
| HH_ETH (ref: Ekoi): Tiv                                        | -0.529*                | -0.525*                     | -0.187        | -0.336     | 0.000      | 0.000      | 0.000       | -0.189     | -0.360                                  | 0.000      | 0.000      | 0.000      | 1.493       | 0.000      |
| HH_ETH (ref: Ekoi): Yoruba                                     | -0.398                 | -0.395                      | 0.162         | -0.053     | 0.949      | 0.000      | -2.229***   | 0.313*     | 0.163                                   | -0.042     | 0.945      | 0.000      | -2.222***   | 0.313*     |
| HH_ETH (ref: Ekoi): Other                                      | -0.499*                | -0.490*                     | 0.000         | 0.000      | 0.000      | 0.000      | -0.852***   | 0.000      | 0.000                                   | 0.000      | 0.000      | 0.000      | -0.850**    | 0.000      |
| HH_SIZ                                                         | -0.014**               | -0.014**                    | -0.012        | -0.021*    | -0.010     | -0.037     | -0.013      | 0.004      | -0.013                                  | -0.021*    | -0.009     | -0.037     | -0.013      | 0.004      |
| HH_WEA                                                         | 0.132***               | 0.132***                    | 0.140***      | 0.112***   | 0.120***   | 0.152***   | 0.107***    | 0.121***   | 0.139***                                | 0.112***   | 0.120***   | 0.152***   | 0.107***    | 0.122***   |
| YEAR (ref: 2003): 2008                                         | 0.784***               | 0.812***                    | 1.026***      | 0.798**    | 1.350***   | 1.354***   | 0.961**     | -0.273     | 1.044***                                | 0.826**    | 1.352***   | 1.355***   | 0.952**     | -0.237     |
| YEAR (ref: 2003): 2013                                         | 1.032***               | 1.064***                    | 0.870**       | 1.389***   | 1.696***   | 1.767***   | 1.833***    | -0.659*    | 0.894***                                | 1.419***   | 1.673***   | 1.787***   | 1.859***    | -0.617*    |
| YEAR (ref: 2003): 2018                                         | 1.237***               | 1.252***                    | 1.389***      | 1.753***   | 1.447***   | 2.088***   | 1.779***    | -0.572     | 1.410***                                | 1.789***   | 1.490***   | 2.084***   | 1.711***    | -0.585     |
| Constant                                                       | -4.445***              | -4.303***                   | -4.563***     | -5.058***  | -7.592***  | -4.376***  | -3.903***   | -3.203***  | -4.425***                               | -4.860***  | -7.380***  | -4.239***  | -3.851***   | -3.074***  |
| Multilevel variance parameter: Level 1                         | 0.354***               | 0.353***                    | 0.213***      | 0.250***   | 0.695***   | 0.305***   | 0.045       | 0.296***   | 0.214***                                | 0.252***   | 0.692***   | 0.304***   | 0.043       | 0.293***   |
| Level 1 Observations (child)                                   | 24367                  | 24367                       | 4346          | 5015       | 7248       | 2034       | 2511        | 3195       | 4346                                    | 5015       | 7248       | 2034       | 2511        | 3195       |
| Level 2 Observations (LGA)                                     | 684                    | 684                         | 113           | 100        | 166        | 85         | 111         | 121        | 113                                     | 100        | 166        | 85         | 111         | 121        |
| Akaike Information Criterion                                   | 17045.336              | 17044.81                    | 4014.257      | 3048.336   | 2966.083   | 1700.836   | 2421.769    | 2826.662   | 4014.885                                | 3048.749   | 2966.498   | 1701.332   | 2421.402    | 2826.912   |
| Prob. > X²                                                     | <0.001                 | <0.001                      | <0.001        | <0.001     | <0.001     | <0.001     | <0.001      | <0.001     | <0.001                                  | <0.001     | <0.001     | <0.001     | <0.001      | <0.001     |

95% confidence intervals in brackets

\* p < 0.10, \*\* p < 0.05, \*\*\* p < 0.01

**Table 6d: Additional robustness checks: decomposition of SIA exposure into different campaign types**

| Dependent variables: various indicators of routine immunisation, maternal care and child survival (see right) | Non-polio full immunisation (full model) |                     | Delivery           |                              | Antenatal care            |               | Child survival (total exposure) | Non-polio full immunisation status (by region) |            |            |             |            |          |
|---------------------------------------------------------------------------------------------------------------|------------------------------------------|---------------------|--------------------|------------------------------|---------------------------|---------------|---------------------------------|------------------------------------------------|------------|------------|-------------|------------|----------|
|                                                                                                               | At home                                  | At private facility | At public facility | No. of antenatal care visits | No. of tetanus injections | Full model    |                                 |                                                |            |            |             |            |          |
|                                                                                                               |                                          |                     |                    |                              |                           | North Central |                                 | North East                                     | North West | South East | South South | South West |          |
| EXP_CHI (NIDs and sNIDs)                                                                                      | -0.037                                   |                     |                    |                              |                           |               | 0.008                           | -0.151                                         | -0.056     | 0.038      | 0.118       | -0.103     |          |
| EXP_CHI (IPDs and sIPDs)                                                                                      | -0.025                                   |                     |                    |                              |                           |               | 0.043                           | -0.093                                         | -0.078     | 0.119      | 0.189       | -0.072     |          |
| EXP_CHI (mop-up campaigns)                                                                                    | -0.007                                   |                     |                    |                              |                           |               | -0.011                          | 0.027                                          | -0.139     | 0.000      | 0.000       | 0.303      |          |
| EXP_CHI (MNCHW)                                                                                               | -0.047                                   |                     |                    |                              |                           |               | -0.175                          | -0.102                                         | 0.117      | -0.034     | -0.348      | -0.030     |          |
| EXP_PREG (NIDs and sNIDs)                                                                                     | 0.014                                    | -0.063              | 0.003              | -0.043                       | 0.002                     |               |                                 |                                                |            |            |             |            |          |
| EXP_PREG (IPDs and sIPDs)                                                                                     | 0.004                                    | -0.093              | 0.020              | -0.059                       | -0.007                    |               |                                 |                                                |            |            |             |            |          |
| EXP_PREG (mop-up campaigns)                                                                                   | -0.012                                   | -0.021              | 0.017              | 0.022                        | 0.013                     |               |                                 |                                                |            |            |             |            |          |
| EXP_PREG (MNCHW)                                                                                              | 0.088                                    | 0.024               | -0.075             | 0.111                        | 0.027                     |               |                                 |                                                |            |            |             |            |          |
| EXP_TOT_nod (NIDs and sNIDs)                                                                                  |                                          |                     |                    |                              |                           |               | -0.035                          |                                                |            |            |             |            |          |
| EXP_TOT_nod (IPDs and sIPDs)                                                                                  |                                          |                     |                    |                              |                           |               | -0.014                          |                                                |            |            |             |            |          |
| EXP_TOT_nod (mop-up campaigns)                                                                                |                                          |                     |                    |                              |                           |               | -0.018                          |                                                |            |            |             |            |          |
| EXP_TOT_nod (MNCHW)                                                                                           |                                          |                     |                    |                              |                           |               | 0.040                           |                                                |            |            |             |            |          |
| CHI_AGE                                                                                                       | 0.079                                    |                     |                    |                              |                           |               | -0.004                          | 0.072                                          | 0.082      | 0.109      | 0.121       | 0.100      | 0.081    |
| CHI_AGE2                                                                                                      | -0.001                                   |                     |                    |                              |                           |               | 0.000                           | -0.001                                         | 0.000      | -0.001     | -0.002      | -0.002     | -0.001   |
| CHI_ORD                                                                                                       | -0.060                                   |                     |                    |                              |                           |               | -0.154                          | -0.034                                         | -0.071     | -0.063     | -0.036      | -0.074     | -0.087   |
| CHI_SEX                                                                                                       | -0.004                                   |                     |                    |                              |                           |               | 0.212                           | -0.075                                         | 0.022      | 0.045      | -0.147      | 0.196      | -0.006   |
| MOT_ANC                                                                                                       | 0.055                                    | -0.138              | 0.057              | 0.062                        |                           |               | -0.001                          | 0.094                                          | 0.145      | 0.064      | 0.031       | 0.041      | 0.039    |
| MOT_EDM                                                                                                       | 0.061                                    | -0.065              | 0.052              | 0.057                        | 0.097                     | 0.031         | 0.013                           | 0.070                                          | 0.072      | 0.067      | 0.054       | 0.053      | 0.043    |
| MOT_EDF                                                                                                       | 0.010                                    | -0.030              | 0.033              | 0.035                        | 0.083                     | 0.023         | 0.028                           | 0.006                                          | 0.006      | 0.029      | 0.016       | 0.007      | -0.030   |
| MOT_AWE                                                                                                       | 2.972                                    | -0.916              | 0.275              | 0.984                        | 1.937                     | 0.640         |                                 | 2.561                                          | 2.882      | 3.549      | 2.629       | 2.927      | 2.959    |
| MOT_AGE                                                                                                       | 0.026                                    | -0.002              | 0.001              | 0.002                        | 0.011                     | 0.000         | 0.010                           | 0.017                                          | 0.031      | 0.037      | 0.013       | 0.027      | 0.031    |
| HH_RUR                                                                                                        | -0.087                                   | 0.538               | -0.375             | -0.325                       | -0.591                    | -0.156        | -0.179                          | -0.038                                         | -0.155     | -0.093     | -0.092      | -0.038     | -0.239   |
| HH_REL (ref: Catholic): Other Christian                                                                       | -0.126                                   | 0.095               | -0.095             | 0.011                        | -0.055                    | -0.047        | -0.137                          | -0.105                                         | -0.562     | 0.465      | -0.109      | -0.409     | -0.093   |
| HH_REL (ref: Catholic): Islam                                                                                 | -0.472                                   | 0.229               | -0.238             | -0.028                       | -0.167                    | -0.100        | -0.069                          | -0.379                                         | -1.077     | -0.301     | -0.073      | 0.020      | -0.403   |
| HH_REL (ref: Catholic): Traditionalist                                                                        | -0.548                                   | 1.008               | -0.914             | -0.478                       | -0.650                    | -0.349        | -0.091                          | -0.697                                         | -1.628     | -0.649     | -0.246      | -0.724     | -0.190   |
| HH_REL (ref: Catholic): Other                                                                                 | -0.224                                   | -0.259              | 0.021              | 0.383                        | -0.057                    | -0.135        | 0.573                           | 0.000                                          | 0.000      | 0.000      | 0.000       | -0.301     | 0.946    |
| HH_ETH (ref: Ekoi): Fulani                                                                                    | -0.926                                   | 0.673               | -0.070             | -0.768                       | -0.745                    | -0.347        | -0.186                          | -0.085                                         | -0.060     | 0.110      | 0.000       |            | -0.692   |
| HH_ETH (ref: Ekoi): Hausa                                                                                     | -0.847                                   | 0.945               | -0.572             | -0.828                       | -0.437                    | -0.250        | -0.504                          | -0.483                                         | -0.073     | 0.361      | -1.194      | -1.657     | -0.229   |
| HH_ETH (ref: Ekoi): Ibibio                                                                                    | -0.633                                   | 0.372               | 0.555              | -0.301                       | -0.212                    | -0.103        | -0.477                          | -0.665                                         | 0.000      | 0.000      | -0.358      | -0.902     | 1.125    |
| HH_ETH (ref: Ekoi): Igala                                                                                     | -0.657                                   | -0.513              | 1.298              | 0.040                        | 0.004                     | 0.276         | -0.400                          | -0.132                                         | 0.000      | 0.000      | -0.644      | -0.762     | 0.698    |
| HH_ETH (ref: Ekoi): Igbo                                                                                      | -0.450                                   | -0.795              | 1.881              | -0.568                       | 1.248                     | 0.120         | -0.528                          | -0.163                                         | 0.534      | 0.274      | -0.896      | -0.502     | 0.524    |
| HH_ETH (ref: Ekoi): Ijaw / Izon                                                                               | -0.486                                   | 0.883               | 0.118              | -0.806                       | -0.696                    | -0.134        | -0.080                          | 0.000                                          | 0.000      | 0.000      | 0.000       | 0.000      | -0.636   |
| HH_ETH (ref: Ekoi): Kanuri / Beriberi                                                                         | -0.987                                   | 1.001               | -0.518             | -0.956                       | -0.512                    | -0.237        | -0.271                          | -0.661                                         | -0.178     | 0.639      | 0.000       | 0.000      | 2.778    |
| HH_ETH (ref: Ekoi): Tiv                                                                                       | -0.601                                   | -0.775              | 1.727              | 0.134                        | -0.904                    | -0.343        | -0.365                          | -0.104                                         | -0.251     | 0.000      | 0.000       | 0.000      | 1.786    |
| HH_ETH (ref: Ekoi): Yoruba                                                                                    | -0.570                                   | -0.165              | 1.300              | -0.413                       | 2.235                     | 0.059         | -0.048                          | 0.187                                          | 0.329      | 0.649      | 0.000       | 0.000      | 0.292    |
| HH_ETH (ref: Ekoi): Other                                                                                     | -0.616                                   | 0.206               | 0.912              | -0.349                       | 0.030                     | -0.017        | -0.361                          | 0.000                                          | 0.000      | 0.000      | 0.000       | -0.887     | 0.000    |
| HH_SIZ                                                                                                        | -0.013                                   | 0.033               | -0.017             | -0.020                       | -0.043                    | -0.006        | 0.132                           | -0.011                                         | -0.021     | -0.008     | -0.011      | -0.019     | -0.011   |
| HH_WEA                                                                                                        | 0.142                                    | -0.206              | 0.120              | 0.129                        | 0.287                     | 0.059         | 0.016                           | 0.149                                          | 0.102      | 0.132      | 0.165       | 0.121      | 0.142    |
| YEAR (ref: 2003): 2008                                                                                        | 0.578                                    | 0.021               | -0.203             | 0.056                        | -0.569                    | -0.080        | 0.268                           | 0.808                                          | 0.797      | 1.411      | 0.666       | 0.675      | -0.271   |
| YEAR (ref: 2003): 2013                                                                                        | 0.726                                    | -0.033              | -0.354             | 0.131                        | -0.217                    | -0.005        | 0.330                           | 0.760                                          | 1.279      | 1.883      | 0.724       | 1.410      | -0.820   |
| YEAR (ref: 2003): 2018                                                                                        | 0.808                                    | -0.228              | -0.412             | 0.342                        | -1.275                    | -0.051        | 0.282                           | 1.141                                          | 1.521      | 1.159      | 1.034       | 1.843      | -0.801   |
| Constant                                                                                                      | -5.234                                   | 2.038               | -3.645             | -2.427                       | 3.586                     | 0.980         | 2.596                           | -5.701                                         | -5.778     | -8.231     | -4.939      | -5.672     | -4.425   |
| Multilevel variance parameter: Level 1                                                                        | 0.285                                    | 0.451               | 0.710              | 0.463                        | 0.672                     | -1.437        | 0.041                           | 0.171                                          | 0.146      | 0.705      | 0.168       | 0.029      | 0.243    |
| Multilevel variance parameter: Residual                                                                       |                                          |                     |                    |                              |                           |               | 1.322                           | 0.090                                          |            |            |             |            |          |
| Level 1 Observations (child)                                                                                  | 24381                                    | 34713               | 34713              | 34713                        | 35019                     | 36585         | 52431                           | 4342                                           | 5017       | 7249       | 2036        | 2514       | 3196     |
| Level 2 Observations (LGA)                                                                                    | 684                                      | 686                 | 686                | 686                          | 686                       | 687           | 689                             | 113                                            | 100        | 166        | 85          | 111        | 121      |
| Akaike Information Criterion                                                                                  | 18035.652                                | 26423.512           | 17597.951          | 30317.164                    | 193631.04                 | 111221.63     | 23679.445                       | 4154.682                                       | 2852.628   | 2871.344   | 2200.745    | 2604.453   | 3247.815 |
| Prob. > X <sup>2</sup>                                                                                        | <0.001                                   | <0.001              | <0.001             | <0.001                       | <0.001                    | <0.001        | <0.001                          | <0.001                                         | <0.001     | <0.001     | <0.001      | <0.001     | <0.001   |

95% confidence intervals in brackets. NID = National Immunisation Day; sNID = sub-National Immunisation Day; IPD = Immunisation-Plus Day; sIPD = sub-national Immunisation-Plus Day; MNCHW = Maternal, Neonatal, and Child Health Week; SIA = Supplementary Immunisation Activity.  
\* p < 0.10, \*\* p < 0.05, \*\*\* p < 0.01

**Table 6e: Additional robustness checks: fixed effects models**

| <i>Dependent variables: various indicators of routine immunisation, maternal care and child survival (see right)</i> | <b>Non-polio full immunisation</b> |                             | <b>Delivery</b> |                     |                    | <b>Antenatal care</b>        |                           | <b>Child</b>    |
|----------------------------------------------------------------------------------------------------------------------|------------------------------------|-----------------------------|-----------------|---------------------|--------------------|------------------------------|---------------------------|-----------------|
|                                                                                                                      | Full model                         | Interaction model (EXPxAGE) | At home         | At private facility | At public facility | No. of antenatal care visits | No. of tetanus injections | Total exposure  |
| EXP_CHI                                                                                                              | -0.020**                           | 0.034**                     |                 |                     |                    |                              |                           |                 |
|                                                                                                                      | [-0.036,-0.004]                    | [0.006,0.062]               |                 |                     |                    |                              |                           |                 |
| EXPxAGE                                                                                                              |                                    | -0.001***                   |                 |                     |                    |                              |                           |                 |
|                                                                                                                      |                                    | [-0.002,-0.001]             |                 |                     |                    |                              |                           |                 |
| EXP_PREG                                                                                                             |                                    |                             | -0.016          | 0.007               | 0.011              | 0.023                        | 0.012***                  |                 |
|                                                                                                                      |                                    |                             | [-0.038,0.006]  | [-0.023,0.037]      | [-0.009,0.032]     | [-0.005,0.052]               | [0.004,0.021]             |                 |
| EXP_TOT_nod (total exposure, date approximation)                                                                     |                                    |                             |                 |                     |                    |                              |                           | -0.029***       |
|                                                                                                                      |                                    |                             |                 |                     |                    |                              |                           | [-0.041,-0.017] |
| CHI_AGE                                                                                                              | 0.080***                           | 0.036***                    |                 |                     |                    |                              |                           | 0.001           |
|                                                                                                                      | [0.064,0.095]                      | [0.028,0.043]               |                 |                     |                    |                              |                           | [-0.010,0.011]  |
| CHI_AGE2                                                                                                             | -0.001***                          |                             |                 |                     |                    |                              |                           | 0.000           |
|                                                                                                                      | [-0.001,-0.001]                    |                             |                 |                     |                    |                              |                           | [-0.000,0.000]  |
| CHI_ORD                                                                                                              | -0.059***                          | -0.060***                   |                 |                     |                    |                              |                           | -0.148***       |
|                                                                                                                      | [-0.085,-0.034]                    | [-0.085,-0.034]             |                 |                     |                    |                              |                           | [-0.171,-0.125] |
| CHI_SEX                                                                                                              | -0.001                             | -0.003                      |                 |                     |                    |                              |                           | 0.212***        |
|                                                                                                                      | [-0.078,0.076]                     | [-0.080,0.074]              |                 |                     |                    |                              |                           | [0.139,0.285]   |
| MOT_ANC                                                                                                              | 0.059***                           | 0.059***                    | -0.133***       | 0.047***            | 0.063***           |                              |                           | 0.003           |
|                                                                                                                      | [0.049,0.068]                      | [0.049,0.068]               | [-0.142,-0.125] | [0.039,0.055]       | [0.056,0.070]      |                              |                           | [-0.008,0.013]  |
| MOT_EDM                                                                                                              | 0.060***                           | 0.060***                    | -0.059***       | 0.040***            | 0.053***           | 0.091***                     | 0.027***                  | 0.015           |
|                                                                                                                      | [0.042,0.079]                      | [0.042,0.079]               | [-0.074,-0.044] | [0.019,0.061]       | [0.038,0.067]      | [0.070,0.112]                | [0.021,0.033]             | [-0.005,0.035]  |
| MOT_EDF                                                                                                              | 0.002                              | 0.002                       | -0.028***       | 0.018               | 0.033***           | 0.078***                     | 0.019***                  | 0.033***        |
|                                                                                                                      | [-0.017,0.021]                     | [-0.017,0.021]              | [-0.043,-0.013] | [-0.004,0.040]      | [0.019,0.048]      | [0.059,0.097]                | [0.014,0.025]             | [0.015,0.051]   |
| MOT_AWE                                                                                                              | 2.988***                           | 2.984***                    | -0.904***       | 0.237***            | 0.951***           | 1.899***                     | 0.615***                  |                 |
|                                                                                                                      | [2.858,3.117]                      | [2.854,3.113]               | [-0.982,-0.827] | [0.123,0.352]       | [0.873,1.030]      | [1.796,2.002]                | [0.586,0.645]             |                 |
| MOT_AGE                                                                                                              | 0.026***                           | 0.027***                    | -0.002          | -0.002              | 0.002              | 0.010***                     | 0.000                     | 0.008*          |
|                                                                                                                      | [0.018,0.035]                      | [0.018,0.036]               | [-0.007,0.004]  | [-0.009,0.005]      | [-0.002,0.007]     | [0.003,0.016]                | [-0.002,0.002]            | [-0.000,0.017]  |
| HH_RUR                                                                                                               | -0.088                             | -0.091                      | 0.531***        | -0.261***           | -0.368***          | -0.527***                    | -0.169***                 | -0.174**        |
|                                                                                                                      | [-0.211,0.035]                     | [-0.214,0.033]              | [0.430,0.632]   | [-0.381,-0.141]     | [-0.459,-0.276]    | [-0.662,-0.391]              | [-0.207,-0.131]           | [-0.308,-0.041] |
| HH_REL (ref: Catholic): Other Christian                                                                              | -0.117                             | -0.119                      | 0.036           | -0.034              | 0.001              | -0.063                       | -0.029                    | -0.113          |
|                                                                                                                      | [-0.267,0.032]                     | [-0.268,0.031]              | [-0.093,0.164]  | [-0.159,0.091]      | [-0.112,0.113]     | [-0.240,0.113]               | [-0.079,0.021]            | [-0.292,0.066]  |
| HH_REL (ref: Catholic): Islam                                                                                        | -0.407***                          | -0.406***                   | 0.150*          | -0.073              | -0.041             | -0.041                       | -0.033                    | -0.054          |
|                                                                                                                      | [-0.594,-0.219]                    | [-0.593,-0.218]             | [-0.009,0.309]  | [-0.240,0.094]      | [-0.182,0.100]     | [-0.258,0.175]               | [-0.094,0.029]            | [-0.273,0.165]  |
| HH_REL (ref: Catholic): Traditionalist                                                                               | -0.530**                           | -0.528**                    | 0.952***        | -0.899***           | -0.492***          | -0.577***                    | -0.305***                 | -0.101          |
|                                                                                                                      | [-0.953,-0.107]                    | [-0.951,-0.105]             | [0.582,1.322]   | [-1.369,-0.428]     | [-0.864,-0.121]    | [-0.985,-0.169]              | [-0.421,-0.188]           | [-0.492,0.290]  |
| HH_REL (ref: Catholic): Other                                                                                        | -0.430                             | -0.433                      | -0.411          | 0.109               | 0.395              | -0.065                       | -0.093                    | 0.670           |
|                                                                                                                      | [-1.507,0.648]                     | [-1.508,0.641]              | [-1.197,0.375]  | [-1.200,1.418]      | [-0.393,1.182]     | [-1.222,1.093]               | [-0.417,0.231]            | [-0.529,1.868]  |
| HH_ETH (ref: Ekoi): Fulani                                                                                           | -0.669**                           | -0.681**                    | 0.762***        | 0.142               | -0.693***          | -0.693*                      | -0.300***                 | 0.219           |
|                                                                                                                      | [-1.279,-0.059]                    | [-1.292,-0.071]             | [0.276,1.248]   | [-0.903,1.187]      | [-1.167,-0.219]    | [-1.442,0.057]               | [-0.516,-0.085]           | [-0.607,1.046]  |
| HH_ETH (ref: Ekoi): Hausa                                                                                            | -0.527*                            | -0.537*                     | 0.919***        | -0.152              | -0.675***          | -0.249                       | -0.149                    | -0.066          |
|                                                                                                                      | [-1.124,0.069]                     | [-1.134,0.061]              | [0.440,1.397]   | [-1.158,0.854]      | [-1.140,-0.210]    | [-0.995,0.496]               | [-0.363,0.065]            | [-0.888,0.757]  |
| HH_ETH (ref: Ekoi): Ibibio                                                                                           | -0.385                             | -0.388                      | 0.236           | 0.322               | -0.106             | -0.354                       | -0.180                    | -0.203          |
|                                                                                                                      | [-1.021,0.251]                     | [-1.025,0.248]              | [-0.298,0.770]  | [-0.712,1.356]      | [-0.620,0.407]     | [-1.185,0.477]               | [-0.418,0.057]            | [-1.114,0.707]  |
| HH_ETH (ref: Ekoi): Igala                                                                                            | -0.482                             | -0.492                      | 0.020           | 0.699               | -0.098             | -0.410                       | 0.190                     | 0.130           |
|                                                                                                                      | [-1.206,0.241]                     | [-1.215,0.232]              | [-0.569,0.609]  | [-0.330,1.729]      | [-0.643,0.448]     | [-1.317,0.498]               | [-0.070,0.451]            | [-0.847,1.108]  |
| HH_ETH (ref: Ekoi): Igbo                                                                                             | -0.167                             | -0.167                      | -0.526**        | 1.189**             | -0.333             | 0.831**                      | -0.034                    | 0.017           |
|                                                                                                                      | [-0.751,0.417]                     | [-0.752,0.418]              | [-1.007,-0.045] | [0.223,2.156]       | [-0.792,0.125]     | [0.082,1.581]                | [-0.249,0.181]            | [-0.821,0.855]  |
| HH_ETH (ref: Ekoi): Ijaw / Izon                                                                                      | -0.302                             | -0.306                      | 0.708**         | -0.017              | -0.599**           | -0.842*                      | -0.163                    | 0.490           |
|                                                                                                                      | [-0.987,0.384]                     | [-0.992,0.380]              | [0.147,1.269]   | [-1.095,1.060]      | [-1.143,-0.056]    | [-1.688,0.005]               | [-0.404,0.078]            | [-0.445,1.425]  |
| HH_ETH (ref: Ekoi): Kanuri / Beriberi                                                                                | -0.488                             | -0.497                      | 1.038***        | -0.045              | -0.887***          | -0.382                       | -0.149                    | -0.082          |
|                                                                                                                      | [-1.194,0.218]                     | [-1.203,0.209]              | [0.495,1.581]   | [-1.336,1.246]      | [-1.415,-0.359]    | [-1.176,0.412]               | [-0.378,0.079]            | [-0.945,0.780]  |
| HH_ETH (ref: Ekoi): Tiv                                                                                              | -0.357                             | -0.373                      | -0.297          | 0.992*              | 0.087              | -0.814*                      | -0.362***                 | 0.209           |
|                                                                                                                      | [-1.084,0.369]                     | [-1.100,0.354]              | [-0.841,0.248]  | [-0.036,2.020]      | [-0.447,0.621]     | [-1.670,0.042]               | [-0.608,-0.116]           | [-0.722,1.139]  |
| HH_ETH (ref: Ekoi): Yoruba                                                                                           | -0.230                             | -0.238                      | 0.291           | 0.702               | -0.428*            | 1.347***                     | 0.048                     | 0.139           |
|                                                                                                                      | [-0.826,0.365]                     | [-0.834,0.358]              | [-0.194,0.776]  | [-0.273,1.677]      | [-0.894,0.038]     | [0.589,2.104]                | [-0.169,0.266]            | [-0.710,0.988]  |
| HH_ETH (ref: Ekoi): Other                                                                                            | -0.393                             | -0.395                      | 0.372           | 0.595               | -0.317             | -0.007                       | -0.006                    | -0.023          |
|                                                                                                                      | [-0.958,0.171]                     | [-0.960,0.170]              | [-0.083,0.828]  | [-0.372,1.561]      | [-0.761,0.126]     | [-0.731,0.717]               | [-0.214,0.202]            | [-0.831,0.786]  |

|                              |                 |                 |                 |                 |                 |                 |                 |                |
|------------------------------|-----------------|-----------------|-----------------|-----------------|-----------------|-----------------|-----------------|----------------|
| HH_SIZ                       | -0.016**        | -0.016**        | 0.033***        | -0.014*         | -0.022***       | -0.039***       | -0.007***       | 0.137***       |
|                              | [-0.030,-0.003] | [-0.030,-0.003] | [0.023,0.043]   | [-0.029,0.001]  | [-0.032,-0.013] | [-0.052,-0.027] | [-0.011,-0.004] | [0.123,0.152]  |
| HH_WEA                       | 0.141***        | 0.140***        | -0.204***       | 0.108***        | 0.131***        | 0.276***        | 0.058***        | 0.008          |
|                              | [0.120,0.163]   | [0.118,0.161]   | [-0.221,-0.186] | [0.086,0.130]   | [0.115,0.147]   | [0.253,0.299]   | [0.051,0.064]   | [-0.014,0.030] |
| YEAR (ref. 2003): 2008       | 0.517***        | 0.495***        | 0.040           | -0.251**        | 0.087           | -0.670***       | -0.108***       | 0.323***       |
|                              | [0.235,0.799]   | [0.211,0.778]   | [-0.156,0.236]  | [-0.472,-0.030] | [-0.097,0.270]  | [-0.921,-0.420] | [-0.180,-0.037] | [0.097,0.549]  |
| YEAR (ref. 2003): 2013       | 0.673***        | 0.635***        | -0.042          | -0.388***       | 0.170*          | -0.314**        | -0.029          | 0.547***       |
|                              | [0.394,0.952]   | [0.353,0.916]   | [-0.237,0.153]  | [-0.607,-0.169] | [-0.011,0.351]  | [-0.563,-0.065] | [-0.100,0.043]  | [0.313,0.780]  |
| YEAR (ref. 2003): 2018       | 0.800***        | 0.890***        | -0.267***       | -0.385***       | 0.391***        | -1.272***       | -0.059          | 0.314***       |
|                              | [0.512,1.087]   | [0.603,1.177]   | [-0.468,-0.066] | [-0.617,-0.153] | [0.203,0.578]   | [-1.530,-1.013] | [-0.133,0.016]  | [0.094,0.535]  |
| Observations                 | 24381           | 24381           | 34713           | 34713           | 34713           | 35019           | 36585           | 52431          |
| Akaike Information Criterion | 18032.806       | 18053.939       | 26153.968       | 17075.688       | 29973.334       | 192578.24       | 111031.373      | 24062.176      |
| Prob. > $\chi^2$             | <0.001          | <0.001          | <0.001          | <0.001          | <0.001          | <0.001          | <0.001          | <0.001         |
| Hausman test                 | 0.068           | 0.023           | <0.001          | <0.001          | <0.001          | <0.001          | <0.001          | <0.001         |

95% confidence intervals in brackets. 774 LGA-level fixed effects estimators omitted from reporting.

\* p < 0.10, \*\* p < 0.05, \*\*\* p < 0.01
